# Supplementary material for: Unraveling the effects of crystallization parameters on affordable semi-industrial scale synthesis of high-performance H-[B]-ZSM-5 for conversion of methanol to propylene (MTP)
Source: Royal Society of Chemistry journal article supplement (doi:10.1039/d5re00403a), 2025-10-27
Supplement: d5re00403a1.xlsx [file d5re00403a1.xlsx]

## Sheet: Phase 1
CHZ (x)	CHZ (y)	SBZ-T150-D18 (x)	SBZ-T150-D18 (y)	SBZ-T150-D36 (x)	SBZ-T150-D36 (y)	SBZ-T150-D42 (x)	SBZ-T150-D42 (y)	SBZ-T160-D18 (x)	SBZ-T160-D18 (y)	SBZ-T160-D36 (x)	SBZ-T160-D36 (y)	SBZ-T160-D42 (x)	SBZ-T160-D42 (y)	SBZ-T170-D18 (x)	SBZ-T170-D18 (y)	SBZ-T170-D36 (x)	SBZ-T170-D36 (y)	SBZ-T170-D42 (x)	SBZ-T170-D42 (y)
2teta	Intensity	2teta	Intensity	2teta	Intensity	2teta	Intensity	2teta	Intensity	2teta	Intensity	2teta	Intensity	2teta	Intensity	2teta	Intensity	2teta	Intensity
4	168	4	36	4	31	4	44	4	31	4	31	4	26	4	33	4	31	4	23
4.02	171.75	4.02	43	4.02	24	4.02	26	4.02	36	4.02	28	4.02	32	4.02	35	4.02	24	4.02	35
4.04	168.75	4.04	29	4.04	26	4.04	28	4.04	35	4.04	37	4.04	27	4.04	42	4.04	26	4.04	24
4.06	166.5	4.06	36	4.06	34	4.06	28	4.06	42	4.06	38	4.06	29	4.06	28	4.06	34	4.06	27
4.08	173.25	4.08	34	4.08	32	4.08	34	4.08	34	4.08	34	4.08	27	4.08	26	4.08	32	4.08	21
4.1	174.75	4.1	37	4.1	33	4.1	33	4.1	26	4.1	28	4.1	30	4.1	24	4.1	33	4.1	30
4.12	171.75	4.12	33	4.12	33	4.12	37	4.12	44	4.12	24	4.12	33	4.12	32	4.12	33	4.12	24
4.14	181.5	4.14	44	4.14	31	4.14	40	4.14	26	4.14	34	4.14	25	4.14	33	4.14	31	4.14	24
4.16	175.5	4.16	33	4.16	38	4.16	43	4.16	27	4.16	32	4.16	22	4.16	22	4.16	38	4.16	29
4.18	177	4.18	25	4.18	35	4.18	41	4.18	35	4.18	24	4.18	19	4.18	32	4.18	35	4.18	18
4.2	175.5	4.2	30	4.2	36	4.2	32	4.2	37	4.2	30	4.2	30	4.2	31	4.2	36	4.2	40
4.22	169.5	4.22	27	4.22	37	4.22	32	4.22	31	4.22	21	4.22	31	4.22	34	4.22	37	4.22	22
4.24	178.5	4.24	29	4.24	26	4.24	30	4.24	27	4.24	36	4.24	21	4.24	30	4.24	26	4.24	17
4.26	175.5	4.26	42	4.26	33	4.26	33	4.26	25	4.26	37	4.26	21	4.26	29	4.26	33	4.26	24
4.28	175.5	4.28	38	4.28	34	4.28	37	4.28	24	4.28	26	4.28	26	4.28	29	4.28	34	4.28	23
4.3	174.75	4.3	29	4.3	24	4.3	31	4.3	23	4.3	31	4.3	32	4.3	38	4.3	24	4.3	25
4.32	175.5	4.32	33	4.32	24	4.32	36	4.32	27	4.32	29	4.32	25	4.32	39	4.32	24	4.32	28
4.34	173.25	4.34	15	4.34	31	4.34	36	4.34	35	4.34	35	4.34	21	4.34	26	4.34	31	4.34	24
4.36	181.5	4.36	31	4.36	29	4.36	25	4.36	24	4.36	40	4.36	22	4.36	39	4.36	29	4.36	29
4.38	179.25	4.38	32	4.38	32	4.38	29	4.38	31	4.38	31	4.38	36	4.38	31	4.38	32	4.38	28
4.4	182.25	4.4	18	4.4	31	4.4	25	4.4	28	4.4	32	4.4	37	4.4	28	4.4	31	4.4	22
4.42	177.75	4.42	29	4.42	23	4.42	39	4.42	29	4.42	26	4.42	23	4.42	44	4.42	23	4.42	24
4.44	170.25	4.44	29	4.44	29	4.44	36	4.44	41	4.44	19	4.44	27	4.44	32	4.44	29	4.44	23
4.46	165	4.46	33	4.46	33	4.46	24	4.46	22	4.46	19	4.46	26	4.46	27	4.46	33	4.46	19
4.48	179.25	4.48	29	4.48	27	4.48	32	4.48	24	4.48	29	4.48	36	4.48	32	4.48	27	4.48	30
4.5	170.25	4.5	40	4.5	37	4.5	31	4.5	29	4.5	34	4.5	18	4.5	27	4.5	37	4.5	24
4.52	179.25	4.52	29	4.52	30	4.52	28	4.52	24	4.52	27	4.52	27	4.52	27	4.52	30	4.52	25
4.54	169.5	4.54	36	4.54	28	4.54	33	4.54	29	4.54	38	4.54	21	4.54	24	4.54	28	4.54	27
4.56	177.75	4.56	17	4.56	27	4.56	40	4.56	31	4.56	34	4.56	29	4.56	30	4.56	27	4.56	24
4.58	167.25	4.58	33	4.58	22	4.58	34	4.58	31	4.58	36	4.58	22	4.58	26	4.58	22	4.58	24
4.6	177	4.6	35	4.6	33	4.6	28	4.6	30	4.6	19	4.6	13	4.6	34	4.6	33	4.6	27
4.62	172.5	4.62	30	4.62	35	4.62	37	4.62	30	4.62	28	4.62	16	4.62	27	4.62	35	4.62	21
4.64	182.25	4.64	33	4.64	36	4.64	36	4.64	21	4.64	33	4.64	25	4.64	29	4.64	36	4.64	19
4.66	184.5	4.66	28	4.66	31	4.66	32	4.66	47	4.66	40	4.66	20	4.66	29	4.66	31	4.66	30
4.68	177.75	4.68	33	4.68	29	4.68	28	4.68	34	4.68	27	4.68	28	4.68	27	4.68	29	4.68	30
4.7	172.5	4.7	33	4.7	25	4.7	31	4.7	21	4.7	30	4.7	20	4.7	34	4.7	25	4.7	22
4.72	180.75	4.72	36	4.72	28	4.72	23	4.72	27	4.72	20	4.72	27	4.72	21	4.72	28	4.72	32
4.74	172.5	4.74	30	4.74	29	4.74	24	4.74	30	4.74	31	4.74	18	4.74	25	4.74	29	4.74	22
4.76	174.75	4.76	29	4.76	19	4.76	21	4.76	24	4.76	31	4.76	28	4.76	27	4.76	19	4.76	28
4.78	175.5	4.78	27	4.78	39	4.78	22	4.78	25	4.78	32	4.78	28	4.78	29	4.78	39	4.78	28
4.8	174.75	4.8	29	4.8	25	4.8	34	4.8	31	4.8	32	4.8	24	4.8	41	4.8	25	4.8	18
4.82	177	4.82	26	4.82	25	4.82	26	4.82	38	4.82	22	4.82	21	4.82	32	4.82	25	4.82	20
4.84	174.75	4.84	35	4.84	33	4.84	36	4.84	31	4.84	30	4.84	17	4.84	35	4.84	33	4.84	27
4.86	180	4.86	18	4.86	32	4.86	33	4.86	25	4.86	22	4.86	29	4.86	27	4.86	32	4.86	20
4.88	173.25	4.88	27	4.88	25	4.88	33	4.88	28	4.88	25	4.88	26	4.88	27	4.88	25	4.88	20
4.9	182.25	4.9	30	4.9	20	4.9	22	4.9	32	4.9	47	4.9	23	4.9	37	4.9	20	4.9	22
4.92	170.25	4.92	33	4.92	27	4.92	25	4.92	25	4.92	25	4.92	20	4.92	25	4.92	27	4.92	29
4.94	171	4.94	35	4.94	31	4.94	27	4.94	29	4.94	25	4.94	27	4.94	25	4.94	31	4.94	21
4.96	174	4.96	29	4.96	29	4.96	31	4.96	24	4.96	25	4.96	18	4.96	33	4.96	29	4.96	32
4.98	177	4.98	37	4.98	18	4.98	21	4.98	22	4.98	31	4.98	18	4.98	29	4.98	18	4.98	30
5	178.5	5	26	5	16	5	26	5	32	5	21	5	35	5	24	5	16	5	18
5.02	178.5	5.02	34	5.02	35	5.02	31	5.02	26	5.02	47	5.02	21	5.02	35	5.02	35	5.02	21
5.04	171	5.04	27	5.04	34	5.04	29	5.04	41	5.04	28	5.04	23	5.04	19	5.04	34	5.04	22
5.06	168.75	5.06	26	5.06	27	5.06	30	5.06	23	5.06	29	5.06	26	5.06	23	5.06	27	5.06	20
5.08	177.75	5.08	40	5.08	25	5.08	19	5.08	30	5.08	27	5.08	14	5.08	24	5.08	25	5.08	11
5.1	171	5.1	30	5.1	26	5.1	37	5.1	23	5.1	35	5.1	17	5.1	22	5.1	26	5.1	18
5.12	183.75	5.12	28	5.12	30	5.12	27	5.12	27	5.12	23	5.12	20	5.12	35	5.12	30	5.12	19
5.14	174.75	5.14	23	5.14	32	5.14	25	5.14	23	5.14	30	5.14	18	5.14	35	5.14	32	5.14	19
5.16	173.25	5.16	31	5.16	25	5.16	27	5.16	26	5.16	30	5.16	21	5.16	25	5.16	25	5.16	23
5.18	169.5	5.18	25	5.18	29	5.18	32	5.18	27	5.18	24	5.18	15	5.18	18	5.18	29	5.18	20
5.2	169.5	5.2	24	5.2	30	5.2	42	5.2	23	5.2	25	5.2	18	5.2	14	5.2	30	5.2	22
5.22	174	5.22	33	5.22	38	5.22	34	5.22	21	5.22	22	5.22	21	5.22	32	5.22	38	5.22	31
5.24	168.75	5.24	41	5.24	27	5.24	43	5.24	27	5.24	31	5.24	21	5.24	30	5.24	27	5.24	20
5.26	171.75	5.26	20	5.26	28	5.26	33	5.26	30	5.26	21	5.26	22	5.26	24	5.26	28	5.26	23
5.28	174	5.28	19	5.28	25	5.28	31	5.28	33	5.28	29	5.28	23	5.28	22	5.28	25	5.28	14
5.3	170.25	5.3	24	5.3	29	5.3	30	5.3	32	5.3	26	5.3	26	5.3	35	5.3	29	5.3	15
5.32	171.75	5.32	28	5.32	16	5.32	24	5.32	30	5.32	35	5.32	14	5.32	19	5.32	16	5.32	19
5.34	176.25	5.34	38	5.34	20	5.34	22	5.34	34	5.34	23	5.34	14	5.34	27	5.34	20	5.34	26
5.36	168.75	5.36	33	5.36	27	5.36	31	5.36	23	5.36	28	5.36	25	5.36	21	5.36	27	5.36	23
5.38	181.5	5.38	27	5.38	21	5.38	25	5.38	35	5.38	33	5.38	15	5.38	19	5.38	21	5.38	17
5.4	179.25	5.4	30	5.4	20	5.4	28	5.4	35	5.4	30	5.4	20	5.4	29	5.4	20	5.4	22
5.42	171.75	5.42	33	5.42	28	5.42	31	5.42	29	5.42	30	5.42	22	5.42	37	5.42	28	5.42	21
5.44	170.25	5.44	32	5.44	30	5.44	35	5.44	34	5.44	29	5.44	17	5.44	35	5.44	30	5.44	16
5.46	174	5.46	31	5.46	27	5.46	29	5.46	23	5.46	22	5.46	20	5.46	36	5.46	27	5.46	19
5.48	168	5.48	27	5.48	26	5.48	26	5.48	16	5.48	24	5.48	21	5.48	19	5.48	26	5.48	16
5.5	178.5	5.5	22	5.5	23	5.5	38	5.5	35	5.5	27	5.5	23	5.5	19	5.5	23	5.5	18
5.52	169.5	5.52	21	5.52	27	5.52	38	5.52	33	5.52	26	5.52	18	5.52	23	5.52	27	5.52	26
5.54	167.25	5.54	34	5.54	24	5.54	31	5.54	29	5.54	30	5.54	17	5.54	20	5.54	24	5.54	27
5.56	166.5	5.56	27	5.56	29	5.56	37	5.56	32	5.56	36	5.56	21	5.56	23	5.56	29	5.56	19
5.58	164.25	5.58	34	5.58	27	5.58	30	5.58	22	5.58	30	5.58	17	5.58	39	5.58	27	5.58	15
5.6	166.5	5.6	26	5.6	25	5.6	34	5.6	22	5.6	32	5.6	26	5.6	30	5.6	25	5.6	18
5.62	174	5.62	21	5.62	33	5.62	27	5.62	35	5.62	36	5.62	23	5.62	31	5.62	33	5.62	15
5.64	171.75	5.64	26	5.64	27	5.64	19	5.64	25	5.64	30	5.64	24	5.64	36	5.64	27	5.64	17
5.66	170.25	5.66	26	5.66	25	5.66	29	5.66	22	5.66	27	5.66	17	5.66	22	5.66	25	5.66	12
5.68	162	5.68	25	5.68	36	5.68	39	5.68	34	5.68	22	5.68	15	5.68	35	5.68	36	5.68	13
5.7	163.5	5.7	29	5.7	22	5.7	20	5.7	22	5.7	28	5.7	15	5.7	31	5.7	22	5.7	17
5.72	169.5	5.72	15	5.72	28	5.72	30	5.72	44	5.72	32	5.72	16	5.72	24	5.72	28	5.72	18
5.74	165	5.74	29	5.74	29	5.74	29	5.74	30	5.74	23	5.74	19	5.74	32	5.74	29	5.74	17
5.76	168	5.76	27	5.76	22	5.76	29	5.76	25	5.76	23	5.76	16	5.76	31	5.76	22	5.76	23
5.78	171	5.78	29	5.78	33	5.78	32	5.78	33	5.78	24	5.78	16	5.78	29	5.78	33	5.78	18
5.8	161.25	5.8	36	5.8	34	5.8	22	5.8	20	5.8	28	5.8	13	5.8	37	5.8	34	5.8	23
5.82	166.5	5.82	28	5.82	24	5.82	33	5.82	33	5.82	30	5.82	26	5.82	32	5.82	24	5.82	16
5.84	168.75	5.84	32	5.84	32	5.84	24	5.84	36	5.84	21	5.84	18	5.84	32	5.84	32	5.84	13
5.86	163.5	5.86	24	5.86	32	5.86	34	5.86	33	5.86	29	5.86	15	5.86	24	5.86	32	5.86	17
5.88	170.25	5.88	38	5.88	29	5.88	26	5.88	33	5.88	28	5.88	14	5.88	26	5.88	29	5.88	19
5.9	168	5.9	29	5.9	35	5.9	30	5.9	35	5.9	36	5.9	12	5.9	25	5.9	35	5.9	28
5.92	172.5	5.92	30	5.92	41	5.92	33	5.92	28	5.92	31	5.92	34	5.92	27	5.92	41	5.92	18
5.94	171.75	5.94	27	5.94	34	5.94	34	5.94	26	5.94	33	5.94	16	5.94	39	5.94	34	5.94	31
5.96	171.75	5.96	26	5.96	25	5.96	30	5.96	34	5.96	37	5.96	21	5.96	40	5.96	25	5.96	18
5.98	164.25	5.98	24	5.98	33	5.98	43	5.98	33	5.98	27	5.98	19	5.98	28	5.98	33	5.98	25
6	171	6	25	6	24	6	35	6	24	6	34	6	20	6	28	6	24	6	21
6.02	166.5	6.02	24	6.02	35	6.02	35	6.02	23	6.02	24	6.02	17	6.02	34	6.02	35	6.02	16
6.04	165	6.04	33	6.04	34	6.04	29	6.04	27	6.04	29	6.04	32	6.04	34	6.04	34	6.04	23
6.06	163.5	6.06	33	6.06	31	6.06	32	6.06	25	6.06	34	6.06	24	6.06	25	6.06	31	6.06	16
6.08	159.75	6.08	30	6.08	34	6.08	33	6.08	26	6.08	38	6.08	17	6.08	29	6.08	34	6.08	18
6.1	170.25	6.1	21	6.1	28	6.1	33	6.1	31	6.1	22	6.1	20	6.1	29	6.1	28	6.1	21
6.12	171.75	6.12	37	6.12	32	6.12	32	6.12	38	6.12	35	6.12	17	6.12	25	6.12	32	6.12	13
6.14	165	6.14	35	6.14	31	6.14	35	6.14	28	6.14	38	6.14	18	6.14	27	6.14	31	6.14	22
6.16	166.5	6.16	26	6.16	30	6.16	32	6.16	37	6.16	35	6.16	25	6.16	36	6.16	30	6.16	13
6.18	174	6.18	17	6.18	36	6.18	36	6.18	35	6.18	39	6.18	19	6.18	38	6.18	36	6.18	15
6.2	172.5	6.2	19	6.2	27	6.2	34	6.2	28	6.2	38	6.2	25	6.2	38	6.2	27	6.2	26
6.22	162.75	6.22	23	6.22	28	6.22	32	6.22	27	6.22	26	6.22	14	6.22	22	6.22	28	6.22	9
6.24	174	6.24	29	6.24	40	6.24	32	6.24	31	6.24	29	6.24	16	6.24	30	6.24	40	6.24	14
6.26	167.25	6.26	26	6.26	21	6.26	28	6.26	36	6.26	23	6.26	16	6.26	38	6.26	21	6.26	12
6.28	165	6.28	31	6.28	33	6.28	27	6.28	35	6.28	22	6.28	15	6.28	19	6.28	33	6.28	15
6.3	174	6.3	27	6.3	28	6.3	37	6.3	28	6.3	29	6.3	13	6.3	26	6.3	28	6.3	11
6.32	172.5	6.32	28	6.32	31	6.32	28	6.32	34	6.32	29	6.32	16	6.32	33	6.32	31	6.32	19
6.34	162.75	6.34	37	6.34	33	6.34	33	6.34	26	6.34	33	6.34	17	6.34	27	6.34	33	6.34	10
6.36	161.25	6.36	27	6.36	23	6.36	31	6.36	31	6.36	27	6.36	23	6.36	45	6.36	23	6.36	14
6.38	166.5	6.38	36	6.38	25	6.38	35	6.38	33	6.38	30	6.38	14	6.38	26	6.38	25	6.38	25
6.4	171.75	6.4	35	6.4	23	6.4	32	6.4	26	6.4	31	6.4	10	6.4	36	6.4	23	6.4	18
6.42	170.25	6.42	33	6.42	30	6.42	26	6.42	24	6.42	24	6.42	16	6.42	27	6.42	30	6.42	22
6.44	170.25	6.44	29	6.44	26	6.44	26	6.44	47	6.44	35	6.44	14	6.44	30	6.44	26	6.44	17
6.46	171	6.46	34	6.46	34	6.46	25	6.46	29	6.46	43	6.46	14	6.46	30	6.46	34	6.46	11
6.48	173.25	6.48	27	6.48	40	6.48	29	6.48	29	6.48	30	6.48	16	6.48	23	6.48	40	6.48	17
6.5	166.5	6.5	28	6.5	29	6.5	22	6.5	31	6.5	33	6.5	22	6.5	36	6.5	29	6.5	15
6.52	167.25	6.52	32	6.52	30	6.52	35	6.52	32	6.52	33	6.52	17	6.52	32	6.52	30	6.52	21
6.54	162	6.54	24	6.54	35	6.54	30	6.54	39	6.54	29	6.54	20	6.54	38	6.54	35	6.54	20
6.56	174.75	6.56	39	6.56	31	6.56	30	6.56	33	6.56	37	6.56	9	6.56	34	6.56	31	6.56	26
6.58	171	6.58	39	6.58	31	6.58	36	6.58	35	6.58	24	6.58	18	6.58	21	6.58	31	6.58	14
6.6	174	6.6	27	6.6	30	6.6	28	6.6	27	6.6	33	6.6	13	6.6	27	6.6	30	6.6	17
6.62	178.5	6.62	31	6.62	35	6.62	33	6.62	27	6.62	29	6.62	15	6.62	27	6.62	35	6.62	13
6.64	167.25	6.64	44	6.64	31	6.64	45	6.64	35	6.64	31	6.64	15	6.64	31	6.64	31	6.64	11
6.66	169.5	6.66	36	6.66	18	6.66	28	6.66	36	6.66	29	6.66	20	6.66	26	6.66	18	6.66	21
6.68	167.25	6.68	33	6.68	35	6.68	25	6.68	22	6.68	30	6.68	11	6.68	28	6.68	35	6.68	15
6.7	175.5	6.7	31	6.7	33	6.7	28	6.7	32	6.7	24	6.7	17	6.7	23	6.7	33	6.7	17
6.72	169.5	6.72	32	6.72	24	6.72	38	6.72	26	6.72	28	6.72	17	6.72	41	6.72	24	6.72	19
6.74	165	6.74	27	6.74	30	6.74	28	6.74	32	6.74	32	6.74	12	6.74	20	6.74	30	6.74	13
6.76	175.5	6.76	36	6.76	27	6.76	30	6.76	39	6.76	24	6.76	17	6.76	26	6.76	27	6.76	8
6.78	169.5	6.78	33	6.78	13	6.78	38	6.78	29	6.78	22	6.78	13	6.78	22	6.78	13	6.78	18
6.8	170.25	6.8	33	6.8	34	6.8	37	6.8	35	6.8	37	6.8	18	6.8	35	6.8	34	6.8	15
6.82	168	6.82	35	6.82	19	6.82	35	6.82	21	6.82	25	6.82	23	6.82	31	6.82	19	6.82	26
6.84	168	6.84	30	6.84	36	6.84	35	6.84	33	6.84	29	6.84	20	6.84	32	6.84	36	6.84	11
6.86	170.25	6.86	30	6.86	31	6.86	37	6.86	33	6.86	33	6.86	15	6.86	35	6.86	31	6.86	22
6.88	171.75	6.88	35	6.88	26	6.88	24	6.88	24	6.88	27	6.88	23	6.88	39	6.88	26	6.88	26
6.9	176.25	6.9	24	6.9	30	6.9	42	6.9	29	6.9	33	6.9	18	6.9	28	6.9	30	6.9	19
6.92	174.75	6.92	34	6.92	27	6.92	36	6.92	31	6.92	30	6.92	22	6.92	24	6.92	27	6.92	20
6.94	172.5	6.94	28	6.94	32	6.94	26	6.94	25	6.94	25	6.94	13	6.94	31	6.94	32	6.94	15
6.96	177.75	6.96	24	6.96	30	6.96	28	6.96	32	6.96	27	6.96	11	6.96	27	6.96	30	6.96	12
6.98	183	6.98	36	6.98	28	6.98	31	6.98	33	6.98	39	6.98	13	6.98	28	6.98	28	6.98	15
7	173.25	7	33	7	34	7	31	7	20	7	31	7	11	7	22	7	34	7	16
7.02	180.75	7.02	21	7.02	27	7.02	26	7.02	29	7.02	28	7.02	13	7.02	30	7.02	27	7.02	18
7.04	174.75	7.04	37	7.04	34	7.04	39	7.04	41	7.04	25	7.04	10	7.04	32	7.04	34	7.04	18
7.06	182.25	7.06	26	7.06	34	7.06	40	7.06	32	7.06	32	7.06	15	7.06	38	7.06	34	7.06	13
7.08	186	7.08	37	7.08	27	7.08	25	7.08	27	7.08	36	7.08	14	7.08	38	7.08	27	7.08	17
7.1	192.75	7.1	31	7.1	27	7.1	31	7.1	26	7.1	34	7.1	27	7.1	33	7.1	27	7.1	13
7.12	183	7.12	36	7.12	25	7.12	28	7.12	29	7.12	24	7.12	13	7.12	21	7.12	25	7.12	12
7.14	189.75	7.14	39	7.14	33	7.14	31	7.14	34	7.14	39	7.14	8	7.14	37	7.14	33	7.14	16
7.16	186	7.16	31	7.16	21	7.16	39	7.16	31	7.16	32	7.16	14	7.16	32	7.16	21	7.16	17
7.18	190.5	7.18	29	7.18	26	7.18	37	7.18	31	7.18	39	7.18	28	7.18	32	7.18	26	7.18	15
7.2	202.5	7.2	30	7.2	31	7.2	31	7.2	32	7.2	40	7.2	22	7.2	32	7.2	31	7.2	10
7.22	174	7.22	41	7.22	32	7.22	35	7.22	25	7.22	34	7.22	25	7.22	39	7.22	32	7.22	11
7.24	187.5	7.24	29	7.24	29	7.24	23	7.24	37	7.24	26	7.24	16	7.24	34	7.24	29	7.24	20
7.26	188.25	7.26	27	7.26	20	7.26	31	7.26	36	7.26	32	7.26	13	7.26	29	7.26	20	7.26	20
7.28	195	7.28	21	7.28	29	7.28	33	7.28	27	7.28	29	7.28	19	7.28	31	7.28	29	7.28	18
7.3	186.75	7.3	30	7.3	30	7.3	30	7.3	31	7.3	26	7.3	27	7.3	41	7.3	30	7.3	18
7.32	189	7.32	32	7.32	24	7.32	35	7.32	24	7.32	39	7.32	14	7.32	35	7.32	24	7.32	16
7.34	192	7.34	35	7.34	34	7.34	31	7.34	30	7.34	33	7.34	13	7.34	26	7.34	34	7.34	18
7.36	201.75	7.36	31	7.36	25	7.36	40	7.36	28	7.36	35	7.36	21	7.36	41	7.36	25	7.36	22
7.38	203.25	7.38	22	7.38	37	7.38	31	7.38	34	7.38	33	7.38	17	7.38	31	7.38	37	7.38	14
7.4	203.25	7.4	27	7.4	30	7.4	38	7.4	28	7.4	30	7.4	17	7.4	26	7.4	30	7.4	11
7.42	218.25	7.42	33	7.42	33	7.42	39	7.42	22	7.42	32	7.42	13	7.42	30	7.42	33	7.42	23
7.44	200.25	7.44	24	7.44	30	7.44	42	7.44	33	7.44	37	7.44	23	7.44	29	7.44	30	7.44	15
7.46	209.25	7.46	35	7.46	35	7.46	35	7.46	30	7.46	27	7.46	27	7.46	42	7.46	35	7.46	21
7.48	222	7.48	40	7.48	37	7.48	44	7.48	40	7.48	33	7.48	19	7.48	42	7.48	37	7.48	22
7.5	224.25	7.5	36	7.5	37	7.5	43	7.5	34	7.5	36	7.5	26	7.5	24	7.5	37	7.5	28
7.52	219.75	7.52	40	7.52	34	7.52	39	7.52	33	7.52	43	7.52	25	7.52	41	7.52	34	7.52	31
7.54	231	7.54	29	7.54	38	7.54	55	7.54	32	7.54	26	7.54	20	7.54	48	7.54	38	7.54	22
7.56	237.75	7.56	38	7.56	36	7.56	46	7.56	42	7.56	34	7.56	27	7.56	41	7.56	36	7.56	41
7.58	249	7.58	51	7.58	49	7.58	68	7.58	43	7.58	39	7.58	34	7.58	52	7.58	49	7.58	42
7.6	234.75	7.6	47	7.6	54	7.6	58	7.6	58	7.6	44	7.6	37	7.6	56	7.6	54	7.6	35
7.62	261.75	7.62	59	7.62	48	7.62	69	7.62	55	7.62	54	7.62	40	7.62	44	7.62	48	7.62	43
7.64	268.5	7.64	60	7.64	61	7.64	93	7.64	63	7.64	41	7.64	44	7.64	63	7.64	61	7.64	59
7.66	273	7.66	62	7.66	66	7.66	99	7.66	52	7.66	56	7.66	47	7.66	72	7.66	66	7.66	63
7.68	277.5	7.68	75	7.68	75	7.68	89	7.68	75	7.68	68	7.68	47	7.68	80	7.68	75	7.68	66
7.7	302.25	7.7	73	7.7	60	7.7	105	7.7	61	7.7	51	7.7	57	7.7	91	7.7	60	7.7	75
7.72	310.5	7.72	88	7.72	96	7.72	147	7.72	67	7.72	55	7.72	99	7.72	110	7.72	96	7.72	98
7.74	315.75	7.74	84	7.74	95	7.74	168	7.74	62	7.74	75	7.74	97	7.74	106	7.74	95	7.74	121
7.76	330.75	7.76	91	7.76	96	7.76	176	7.76	100	7.76	85	7.76	117	7.76	124	7.76	96	7.76	133
7.78	374.25	7.78	144	7.78	104	7.78	202	7.78	120	7.78	104	7.78	148	7.78	176	7.78	104	7.78	167
7.8	369	7.8	189	7.8	152	7.8	193	7.8	98	7.8	89	7.8	161	7.8	175	7.8	152	7.8	174
7.82	402	7.82	177	7.82	164	7.82	287	7.82	164	7.82	140	7.82	194	7.82	212	7.82	164	7.82	208
7.84	403.5	7.84	210	7.84	188	7.84	308	7.84	161	7.84	151	7.84	236	7.84	220	7.84	188	7.84	221
7.86	475.5	7.86	215	7.86	217	7.86	317	7.86	209	7.86	169	7.86	240	7.86	254	7.86	217	7.86	237
7.88	471.75	7.88	255	7.88	232	7.88	317	7.88	218	7.88	180	7.88	266	7.88	303	7.88	232	7.88	287
7.9	485.25	7.9	295	7.9	246	7.9	292	7.9	267	7.9	208	7.9	266	7.9	284	7.9	246	7.9	241
7.92	459	7.92	307	7.92	291	7.92	283	7.92	292	7.92	227	7.92	279	7.92	328	7.92	291	7.92	310
7.94	362.25	7.94	306	7.94	314	7.94	291	7.94	328	7.94	284	7.94	273	7.94	304	7.94	314	7.94	314
7.96	315	7.96	305	7.96	375	7.96	239	7.96	323	7.96	286	7.96	235	7.96	282	7.96	375	7.96	270
7.98	274.5	7.98	326	7.98	294	7.98	199	7.98	372	7.98	298	7.98	238	7.98	297	7.98	294	7.98	206
8	258.75	8	284	8	321	8	164	8	318	8	280	8	198	8	255	8	321	8	201
8.02	220.5	8.02	249	8.02	266	8.02	123	8.02	310	8.02	303	8.02	143	8.02	190	8.02	266	8.02	135
8.04	215.25	8.04	211	8.04	219	8.04	107	8.04	259	8.04	282	8.04	130	8.04	145	8.04	219	8.04	126
8.06	213	8.06	183	8.06	203	8.06	85	8.06	221	8.06	261	8.06	85	8.06	139	8.06	203	8.06	97
8.08	203.25	8.08	141	8.08	160	8.08	82	8.08	162	8.08	196	8.08	80	8.08	127	8.08	160	8.08	72
8.1	200.25	8.1	112	8.1	122	8.1	81	8.1	137	8.1	154	8.1	74	8.1	82	8.1	122	8.1	52
8.12	187.5	8.12	75	8.12	108	8.12	58	8.12	116	8.12	118	8.12	65	8.12	73	8.12	108	8.12	67
8.14	203.25	8.14	82	8.14	104	8.14	54	8.14	85	8.14	79	8.14	54	8.14	71	8.14	104	8.14	47
8.16	200.25	8.16	65	8.16	87	8.16	59	8.16	77	8.16	61	8.16	41	8.16	67	8.16	87	8.16	48
8.18	203.25	8.18	62	8.18	58	8.18	47	8.18	86	8.18	54	8.18	37	8.18	56	8.18	58	8.18	35
8.2	207	8.2	79	8.2	66	8.2	51	8.2	61	8.2	70	8.2	40	8.2	55	8.2	66	8.2	36
8.22	196.5	8.22	69	8.22	52	8.22	55	8.22	75	8.22	54	8.22	32	8.22	47	8.22	52	8.22	27
8.24	205.5	8.24	53	8.24	37	8.24	57	8.24	63	8.24	46	8.24	33	8.24	45	8.24	37	8.24	22
8.26	201	8.26	55	8.26	46	8.26	48	8.26	48	8.26	61	8.26	24	8.26	48	8.26	46	8.26	26
8.28	198.75	8.28	55	8.28	44	8.28	46	8.28	51	8.28	42	8.28	35	8.28	40	8.28	44	8.28	32
8.3	206.25	8.3	65	8.3	42	8.3	33	8.3	46	8.3	46	8.3	36	8.3	53	8.3	42	8.3	18
8.32	207	8.32	40	8.32	35	8.32	39	8.32	35	8.32	51	8.32	26	8.32	39	8.32	35	8.32	20
8.34	211.5	8.34	40	8.34	40	8.34	46	8.34	39	8.34	44	8.34	26	8.34	38	8.34	40	8.34	28
8.36	211.5	8.36	33	8.36	38	8.36	42	8.36	44	8.36	33	8.36	35	8.36	44	8.36	38	8.36	27
8.38	215.25	8.38	28	8.38	36	8.38	34	8.38	48	8.38	40	8.38	26	8.38	36	8.38	36	8.38	20
8.4	224.25	8.4	46	8.4	37	8.4	58	8.4	45	8.4	39	8.4	22	8.4	36	8.4	37	8.4	20
8.42	228.75	8.42	47	8.42	45	8.42	49	8.42	30	8.42	45	8.42	22	8.42	39	8.42	45	8.42	19
8.44	224.25	8.44	44	8.44	39	8.44	42	8.44	37	8.44	34	8.44	32	8.44	26	8.44	39	8.44	22
8.46	249	8.46	52	8.46	47	8.46	36	8.46	26	8.46	46	8.46	36	8.46	40	8.46	47	8.46	36
8.48	227.25	8.48	47	8.48	34	8.48	46	8.48	36	8.48	43	8.48	22	8.48	42	8.48	34	8.48	43
8.5	246	8.5	52	8.5	45	8.5	44	8.5	27	8.5	39	8.5	39	8.5	43	8.5	45	8.5	25
8.52	230.25	8.52	40	8.52	51	8.52	46	8.52	42	8.52	49	8.52	25	8.52	47	8.52	51	8.52	33
8.54	240	8.54	62	8.54	32	8.54	59	8.54	54	8.54	50	8.54	29	8.54	54	8.54	32	8.54	31
8.56	249.75	8.56	51	8.56	53	8.56	73	8.56	48	8.56	49	8.56	38	8.56	48	8.56	53	8.56	43
8.58	261	8.58	55	8.58	48	8.58	71	8.58	46	8.58	55	8.58	36	8.58	57	8.58	48	8.58	61
8.6	255.75	8.6	67	8.6	50	8.6	87	8.6	51	8.6	41	8.6	58	8.6	75	8.6	50	8.6	58
8.62	283.5	8.62	72	8.62	59	8.62	97	8.62	56	8.62	60	8.62	66	8.62	87	8.62	59	8.62	78
8.64	280.5	8.64	92	8.64	64	8.64	104	8.64	62	8.64	59	8.64	77	8.64	96	8.64	64	8.64	85
8.66	318	8.66	103	8.66	77	8.66	129	8.66	78	8.66	69	8.66	75	8.66	94	8.66	77	8.66	98
8.68	339	8.68	105	8.68	89	8.68	124	8.68	84	8.68	57	8.68	101	8.68	105	8.68	89	8.68	108
8.7	328.5	8.7	153	8.7	107	8.7	171	8.7	94	8.7	73	8.7	115	8.7	141	8.7	107	8.7	130
8.72	375.75	8.72	116	8.72	109	8.72	180	8.72	105	8.72	81	8.72	140	8.72	127	8.72	109	8.72	145
8.74	384	8.74	154	8.74	154	8.74	188	8.74	114	8.74	88	8.74	151	8.74	176	8.74	154	8.74	143
8.76	375	8.76	177	8.76	162	8.76	204	8.76	132	8.76	122	8.76	157	8.76	195	8.76	162	8.76	168
8.78	353.25	8.78	195	8.78	168	8.78	188	8.78	156	8.78	137	8.78	172	8.78	203	8.78	168	8.78	198
8.8	345	8.8	188	8.8	196	8.8	205	8.8	172	8.8	147	8.8	177	8.8	215	8.8	196	8.8	167
8.82	327	8.82	168	8.82	211	8.82	189	8.82	195	8.82	176	8.82	178	8.82	213	8.82	211	8.82	187
8.84	322.5	8.84	227	8.84	191	8.84	183	8.84	206	8.84	157	8.84	156	8.84	223	8.84	191	8.84	184
8.86	302.25	8.86	203	8.86	227	8.86	182	8.86	203	8.86	196	8.86	195	8.86	213	8.86	227	8.86	183
8.88	294.75	8.88	194	8.88	216	8.88	173	8.88	179	8.88	217	8.88	179	8.88	216	8.88	216	8.88	152
8.9	264	8.9	203	8.9	183	8.9	140	8.9	199	8.9	195	8.9	166	8.9	164	8.9	183	8.9	133
8.92	261	8.92	173	8.92	151	8.92	121	8.92	190	8.92	214	8.92	141	8.92	138	8.92	151	8.92	131
8.94	250.5	8.94	172	8.94	179	8.94	130	8.94	193	8.94	171	8.94	127	8.94	156	8.94	179	8.94	111
8.96	241.5	8.96	154	8.96	153	8.96	105	8.96	165	8.96	149	8.96	104	8.96	130	8.96	153	8.96	90
8.98	225.75	8.98	140	8.98	137	8.98	114	8.98	147	8.98	137	8.98	86	8.98	126	8.98	137	8.98	89
9	244.5	9	141	9	114	9	98	9	130	9	131	9	86	9	104	9	114	9	82
9.02	234	9.02	125	9.02	104	9.02	89	9.02	106	9.02	95	9.02	95	9.02	109	9.02	104	9.02	87
9.04	249.75	9.04	100	9.04	118	9.04	102	9.04	108	9.04	91	9.04	74	9.04	93	9.04	118	9.04	71
9.06	245.25	9.06	102	9.06	87	9.06	94	9.06	109	9.06	98	9.06	88	9.06	118	9.06	87	9.06	81
9.08	228	9.08	91	9.08	129	9.08	99	9.08	91	9.08	87	9.08	63	9.08	105	9.08	129	9.08	78
9.1	229.5	9.1	91	9.1	119	9.1	70	9.1	89	9.1	100	9.1	65	9.1	94	9.1	119	9.1	73
9.12	220.5	9.12	75	9.12	91	9.12	83	9.12	100	9.12	75	9.12	70	9.12	76	9.12	91	9.12	70
9.14	212.25	9.14	102	9.14	106	9.14	49	9.14	92	9.14	70	9.14	61	9.14	64	9.14	106	9.14	51
9.16	198.75	9.16	80	9.16	72	9.16	66	9.16	82	9.16	81	9.16	51	9.16	79	9.16	72	9.16	49
9.18	198	9.18	86	9.18	82	9.18	66	9.18	73	9.18	78	9.18	60	9.18	52	9.18	82	9.18	38
9.2	201.75	9.2	63	9.2	64	9.2	45	9.2	64	9.2	94	9.2	28	9.2	51	9.2	64	9.2	35
9.22	189.75	9.22	55	9.22	52	9.22	50	9.22	72	9.22	74	9.22	36	9.22	61	9.22	52	9.22	28
9.24	195.75	9.24	48	9.24	53	9.24	38	9.24	45	9.24	58	9.24	31	9.24	55	9.24	53	9.24	23
9.26	198	9.26	54	9.26	54	9.26	47	9.26	43	9.26	46	9.26	26	9.26	37	9.26	54	9.26	30
9.28	195	9.28	50	9.28	43	9.28	40	9.28	36	9.28	51	9.28	23	9.28	55	9.28	43	9.28	24
9.3	188.25	9.3	40	9.3	49	9.3	28	9.3	37	9.3	43	9.3	24	9.3	31	9.3	49	9.3	23
9.32	186	9.32	38	9.32	44	9.32	34	9.32	40	9.32	37	9.32	20	9.32	32	9.32	44	9.32	18
9.34	189.75	9.34	40	9.34	34	9.34	33	9.34	35	9.34	40	9.34	23	9.34	49	9.34	34	9.34	23
9.36	185.25	9.36	28	9.36	31	9.36	29	9.36	34	9.36	38	9.36	20	9.36	40	9.36	31	9.36	17
9.38	193.5	9.38	28	9.38	34	9.38	33	9.38	40	9.38	33	9.38	14	9.38	39	9.38	34	9.38	27
9.4	183	9.4	36	9.4	36	9.4	27	9.4	32	9.4	34	9.4	18	9.4	32	9.4	36	9.4	10
9.42	194.25	9.42	28	9.42	24	9.42	32	9.42	29	9.42	33	9.42	25	9.42	44	9.42	24	9.42	24
9.44	189.75	9.44	20	9.44	28	9.44	30	9.44	20	9.44	33	9.44	16	9.44	35	9.44	28	9.44	19
9.46	185.25	9.46	22	9.46	25	9.46	27	9.46	33	9.46	28	9.46	22	9.46	32	9.46	25	9.46	14
9.48	190.5	9.48	22	9.48	22	9.48	25	9.48	24	9.48	37	9.48	17	9.48	28	9.48	22	9.48	19
9.5	193.5	9.5	38	9.5	37	9.5	30	9.5	26	9.5	35	9.5	23	9.5	29	9.5	37	9.5	13
9.52	186.75	9.52	26	9.52	23	9.52	33	9.52	26	9.52	29	9.52	10	9.52	30	9.52	23	9.52	12
9.54	182.25	9.54	36	9.54	37	9.54	23	9.54	37	9.54	33	9.54	17	9.54	24	9.54	37	9.54	12
9.56	183.75	9.56	20	9.56	27	9.56	31	9.56	27	9.56	36	9.56	18	9.56	27	9.56	27	9.56	14
9.58	181.5	9.58	28	9.58	28	9.58	30	9.58	32	9.58	31	9.58	12	9.58	27	9.58	28	9.58	19
9.6	183.75	9.6	20	9.6	21	9.6	29	9.6	27	9.6	35	9.6	18	9.6	28	9.6	21	9.6	13
9.62	183.75	9.62	28	9.62	22	9.62	21	9.62	25	9.62	39	9.62	16	9.62	30	9.62	22	9.62	25
9.64	182.25	9.64	32	9.64	31	9.64	21	9.64	21	9.64	32	9.64	15	9.64	21	9.64	31	9.64	20
9.66	186	9.66	23	9.66	19	9.66	22	9.66	17	9.66	35	9.66	18	9.66	28	9.66	19	9.66	13
9.68	198.75	9.68	29	9.68	25	9.68	39	9.68	20	9.68	28	9.68	17	9.68	25	9.68	25	9.68	20
9.7	184.5	9.7	25	9.7	30	9.7	23	9.7	29	9.7	24	9.7	14	9.7	36	9.7	30	9.7	11
9.72	177.75	9.72	26	9.72	20	9.72	29	9.72	30	9.72	27	9.72	12	9.72	27	9.72	20	9.72	14
9.74	190.5	9.74	19	9.74	28	9.74	27	9.74	28	9.74	30	9.74	15	9.74	29	9.74	28	9.74	16
9.76	186	9.76	40	9.76	17	9.76	25	9.76	22	9.76	33	9.76	16	9.76	28	9.76	17	9.76	12
9.78	187.5	9.78	30	9.78	19	9.78	31	9.78	28	9.78	29	9.78	10	9.78	36	9.78	19	9.78	14
9.8	182.25	9.8	24	9.8	30	9.8	29	9.8	34	9.8	29	9.8	20	9.8	33	9.8	30	9.8	16
9.82	183	9.82	30	9.82	20	9.82	39	9.82	29	9.82	31	9.82	16	9.82	25	9.82	20	9.82	18
9.84	184.5	9.84	30	9.84	25	9.84	36	9.84	22	9.84	27	9.84	13	9.84	31	9.84	25	9.84	14
9.86	184.5	9.86	31	9.86	23	9.86	27	9.86	26	9.86	24	9.86	11	9.86	21	9.86	23	9.86	9
9.88	168.75	9.88	18	9.88	14	9.88	33	9.88	30	9.88	32	9.88	14	9.88	20	9.88	14	9.88	17
9.9	170.25	9.9	25	9.9	18	9.9	25	9.9	31	9.9	29	9.9	17	9.9	24	9.9	18	9.9	9
9.92	178.5	9.92	27	9.92	27	9.92	33	9.92	23	9.92	44	9.92	10	9.92	29	9.92	27	9.92	12
9.94	171.75	9.94	21	9.94	19	9.94	21	9.94	28	9.94	31	9.94	13	9.94	23	9.94	19	9.94	8
9.96	173.25	9.96	32	9.96	20	9.96	22	9.96	18	9.96	31	9.96	8	9.96	23	9.96	20	9.96	12
9.98	165.75	9.98	36	9.98	32	9.98	22	9.98	16	9.98	36	9.98	12	9.98	36	9.98	32	9.98	11
10	171	10	19	10	16	10	25	10	19	10	37	10	17	10	28	10	16	10	13
10.02	176.25	10.02	22	10.02	23	10.02	17	10.02	19	10.02	20	10.02	14	10.02	33	10.02	23	10.02	21
10.04	167.25	10.04	23	10.04	27	10.04	26	10.04	22	10.04	30	10.04	12	10.04	26	10.04	27	10.04	12
10.06	169.5	10.06	27	10.06	14	10.06	24	10.06	17	10.06	21	10.06	18	10.06	35	10.06	14	10.06	20
10.08	176.25	10.08	24	10.08	18	10.08	25	10.08	29	10.08	15	10.08	8	10.08	23	10.08	18	10.08	12
10.1	174.75	10.1	27	10.1	23	10.1	26	10.1	20	10.1	29	10.1	12	10.1	26	10.1	23	10.1	14
10.12	172.5	10.12	23	10.12	28	10.12	21	10.12	17	10.12	27	10.12	10	10.12	26	10.12	28	10.12	17
10.14	168.75	10.14	20	10.14	17	10.14	28	10.14	20	10.14	21	10.14	13	10.14	24	10.14	17	10.14	15
10.16	169.5	10.16	24	10.16	26	10.16	26	10.16	20	10.16	35	10.16	8	10.16	24	10.16	26	10.16	15
10.18	166.5	10.18	22	10.18	22	10.18	18	10.18	22	10.18	34	10.18	9	10.18	30	10.18	22	10.18	14
10.2	171.75	10.2	24	10.2	24	10.2	20	10.2	23	10.2	31	10.2	21	10.2	36	10.2	24	10.2	11
10.22	170.25	10.22	17	10.22	31	10.22	25	10.22	23	10.22	20	10.22	10	10.22	30	10.22	31	10.22	5
10.24	170.25	10.24	24	10.24	20	10.24	28	10.24	19	10.24	28	10.24	8	10.24	26	10.24	20	10.24	10
10.26	165.75	10.26	20	10.26	18	10.26	21	10.26	22	10.26	16	10.26	15	10.26	28	10.26	18	10.26	12
10.28	177.75	10.28	17	10.28	27	10.28	21	10.28	10	10.28	21	10.28	8	10.28	33	10.28	27	10.28	12
10.3	160.5	10.3	17	10.3	25	10.3	8	10.3	16	10.3	29	10.3	13	10.3	14	10.3	25	10.3	7
10.32	166.5	10.32	25	10.32	24	10.32	32	10.32	15	10.32	28	10.32	9	10.32	18	10.32	24	10.32	13
10.34	165	10.34	33	10.34	24	10.34	18	10.34	25	10.34	17	10.34	5	10.34	16	10.34	24	10.34	13
10.36	165	10.36	24	10.36	23	10.36	29	10.36	18	10.36	23	10.36	14	10.36	23	10.36	23	10.36	13
10.38	167.25	10.38	28	10.38	20	10.38	20	10.38	26	10.38	23	10.38	14	10.38	25	10.38	20	10.38	10
10.4	166.5	10.4	19	10.4	23	10.4	26	10.4	17	10.4	19	10.4	14	10.4	34	10.4	23	10.4	13
10.42	159.75	10.42	19	10.42	17	10.42	24	10.42	21	10.42	26	10.42	14	10.42	23	10.42	17	10.42	9
10.44	163.5	10.44	19	10.44	24	10.44	30	10.44	24	10.44	16	10.44	7	10.44	31	10.44	24	10.44	7
10.46	164.25	10.46	22	10.46	22	10.46	18	10.46	27	10.46	21	10.46	8	10.46	29	10.46	22	10.46	3
10.48	165.75	10.48	16	10.48	14	10.48	22	10.48	19	10.48	12	10.48	11	10.48	24	10.48	14	10.48	16
10.5	162.75	10.5	24	10.5	20	10.5	16	10.5	23	10.5	28	10.5	5	10.5	22	10.5	20	10.5	10
10.52	165.75	10.52	31	10.52	13	10.52	23	10.52	27	10.52	29	10.52	7	10.52	24	10.52	13	10.52	11
10.54	161.25	10.54	25	10.54	17	10.54	16	10.54	30	10.54	30	10.54	11	10.54	22	10.54	17	10.54	11
10.56	159	10.56	19	10.56	22	10.56	24	10.56	22	10.56	24	10.56	14	10.56	37	10.56	22	10.56	8
10.58	166.5	10.58	17	10.58	22	10.58	22	10.58	22	10.58	23	10.58	8	10.58	26	10.58	22	10.58	13
10.6	164.25	10.6	21	10.6	17	10.6	17	10.6	24	10.6	19	10.6	7	10.6	26	10.6	17	10.6	4
10.62	165.75	10.62	24	10.62	14	10.62	21	10.62	15	10.62	16	10.62	10	10.62	21	10.62	14	10.62	20
10.64	163.5	10.64	23	10.64	12	10.64	19	10.64	16	10.64	22	10.64	11	10.64	17	10.64	12	10.64	7
10.66	160.5	10.66	12	10.66	12	10.66	23	10.66	19	10.66	21	10.66	7	10.66	20	10.66	12	10.66	9
10.68	162	10.68	24	10.68	19	10.68	19	10.68	20	10.68	25	10.68	12	10.68	23	10.68	19	10.68	8
10.7	165.75	10.7	25	10.7	18	10.7	14	10.7	22	10.7	19	10.7	11	10.7	21	10.7	18	10.7	8
10.72	165	10.72	14	10.72	14	10.72	21	10.72	20	10.72	23	10.72	12	10.72	25	10.72	14	10.72	8
10.74	159	10.74	20	10.74	20	10.74	17	10.74	20	10.74	21	10.74	11	10.74	35	10.74	20	10.74	10
10.76	165	10.76	22	10.76	16	10.76	24	10.76	15	10.76	20	10.76	10	10.76	25	10.76	16	10.76	12
10.78	160.5	10.78	18	10.78	18	10.78	32	10.78	17	10.78	16	10.78	10	10.78	16	10.78	18	10.78	13
10.8	168	10.8	17	10.8	21	10.8	16	10.8	14	10.8	21	10.8	11	10.8	28	10.8	21	10.8	13
10.82	163.5	10.82	15	10.82	21	10.82	23	10.82	23	10.82	19	10.82	4	10.82	18	10.82	21	10.82	18
10.84	164.25	10.84	15	10.84	14	10.84	30	10.84	21	10.84	21	10.84	9	10.84	24	10.84	14	10.84	16
10.86	157.5	10.86	25	10.86	15	10.86	30	10.86	14	10.86	16	10.86	5	10.86	26	10.86	15	10.86	8
10.88	166.5	10.88	19	10.88	17	10.88	25	10.88	22	10.88	30	10.88	8	10.88	26	10.88	17	10.88	13
10.9	167.25	10.9	17	10.9	27	10.9	22	10.9	18	10.9	19	10.9	11	10.9	23	10.9	27	10.9	16
10.92	167.25	10.92	21	10.92	20	10.92	18	10.92	22	10.92	27	10.92	11	10.92	27	10.92	20	10.92	10
10.94	166.5	10.94	13	10.94	25	10.94	20	10.94	17	10.94	22	10.94	8	10.94	20	10.94	25	10.94	14
10.96	165.75	10.96	26	10.96	14	10.96	26	10.96	11	10.96	27	10.96	13	10.96	25	10.96	14	10.96	18
10.98	166.5	10.98	16	10.98	17	10.98	32	10.98	27	10.98	18	10.98	10	10.98	25	10.98	17	10.98	12
11	165.75	11	21	11	17	11	22	11	19	11	15	11	12	11	29	11	17	11	10
11.02	166.5	11.02	19	11.02	16	11.02	23	11.02	15	11.02	21	11.02	8	11.02	15	11.02	16	11.02	4
11.04	171.75	11.04	20	11.04	20	11.04	16	11.04	14	11.04	24	11.04	15	11.04	22	11.04	20	11.04	7
11.06	161.25	11.06	16	11.06	18	11.06	21	11.06	16	11.06	30	11.06	15	11.06	25	11.06	18	11.06	13
11.08	164.25	11.08	13	11.08	24	11.08	16	11.08	11	11.08	18	11.08	6	11.08	29	11.08	24	11.08	13
11.1	163.5	11.1	9	11.1	22	11.1	28	11.1	17	11.1	26	11.1	7	11.1	27	11.1	22	11.1	10
11.12	165.75	11.12	11	11.12	18	11.12	21	11.12	28	11.12	23	11.12	9	11.12	19	11.12	18	11.12	10
11.14	163.5	11.14	23	11.14	16	11.14	21	11.14	14	11.14	18	11.14	11	11.14	22	11.14	16	11.14	11
11.16	163.5	11.16	10	11.16	21	11.16	19	11.16	22	11.16	19	11.16	11	11.16	21	11.16	21	11.16	10
11.18	161.25	11.18	17	11.18	13	11.18	18	11.18	25	11.18	27	11.18	7	11.18	16	11.18	13	11.18	9
11.2	163.5	11.2	29	11.2	12	11.2	25	11.2	11	11.2	18	11.2	10	11.2	40	11.2	12	11.2	8
11.22	162	11.22	15	11.22	16	11.22	22	11.22	16	11.22	18	11.22	11	11.22	21	11.22	16	11.22	10
11.24	168	11.24	12	11.24	16	11.24	11	11.24	18	11.24	11	11.24	12	11.24	26	11.24	16	11.24	9
11.26	164.25	11.26	11	11.26	18	11.26	25	11.26	17	11.26	13	11.26	9	11.26	16	11.26	18	11.26	9
11.28	164.25	11.28	11	11.28	18	11.28	18	11.28	13	11.28	18	11.28	6	11.28	25	11.28	18	11.28	9
11.3	166.5	11.3	9	11.3	19	11.3	15	11.3	15	11.3	20	11.3	3	11.3	20	11.3	19	11.3	9
11.32	164.25	11.32	15	11.32	26	11.32	27	11.32	14	11.32	18	11.32	8	11.32	28	11.32	26	11.32	11
11.34	166.5	11.34	18	11.34	19	11.34	18	11.34	6	11.34	22	11.34	9	11.34	20	11.34	19	11.34	9
11.36	162	11.36	19	11.36	15	11.36	18	11.36	12	11.36	16	11.36	3	11.36	19	11.36	15	11.36	10
11.38	159.75	11.38	18	11.38	18	11.38	16	11.38	9	11.38	14	11.38	11	11.38	15	11.38	18	11.38	7
11.4	160.5	11.4	15	11.4	13	11.4	18	11.4	21	11.4	21	11.4	7	11.4	14	11.4	13	11.4	15
11.42	163.5	11.42	14	11.42	13	11.42	23	11.42	23	11.42	14	11.42	11	11.42	19	11.42	13	11.42	10
11.44	164.25	11.44	21	11.44	7	11.44	18	11.44	16	11.44	11	11.44	15	11.44	24	11.44	7	11.44	12
11.46	165	11.46	17	11.46	14	11.46	16	11.46	12	11.46	10	11.46	7	11.46	16	11.46	14	11.46	14
11.48	165	11.48	12	11.48	20	11.48	15	11.48	11	11.48	23	11.48	9	11.48	23	11.48	20	11.48	7
11.5	168.75	11.5	16	11.5	15	11.5	18	11.5	20	11.5	22	11.5	8	11.5	11	11.5	15	11.5	12
11.52	169.5	11.52	12	11.52	20	11.52	12	11.52	14	11.52	22	11.52	14	11.52	13	11.52	20	11.52	11
11.54	164.25	11.54	20	11.54	18	11.54	16	11.54	23	11.54	16	11.54	8	11.54	17	11.54	18	11.54	8
11.56	164.25	11.56	10	11.56	25	11.56	16	11.56	11	11.56	16	11.56	13	11.56	12	11.56	25	11.56	10
11.58	159	11.58	20	11.58	13	11.58	26	11.58	15	11.58	18	11.58	7	11.58	17	11.58	13	11.58	14
11.6	160.5	11.6	16	11.6	18	11.6	18	11.6	13	11.6	21	11.6	10	11.6	28	11.6	18	11.6	12
11.62	161.25	11.62	19	11.62	18	11.62	14	11.62	21	11.62	14	11.62	10	11.62	20	11.62	18	11.62	12
11.64	168	11.64	10	11.64	17	11.64	21	11.64	13	11.64	19	11.64	8	11.64	29	11.64	17	11.64	14
11.66	159.75	11.66	12	11.66	14	11.66	22	11.66	25	11.66	13	11.66	7	11.66	22	11.66	14	11.66	14
11.68	168.75	11.68	20	11.68	15	11.68	18	11.68	17	11.68	21	11.68	12	11.68	23	11.68	15	11.68	10
11.7	168.75	11.7	19	11.7	20	11.7	22	11.7	22	11.7	12	11.7	7	11.7	18	11.7	20	11.7	10
11.72	171.75	11.72	15	11.72	19	11.72	23	11.72	12	11.72	14	11.72	12	11.72	18	11.72	19	11.72	10
11.74	166.5	11.74	18	11.74	16	11.74	32	11.74	15	11.74	23	11.74	7	11.74	21	11.74	16	11.74	7
11.76	175.5	11.76	21	11.76	26	11.76	23	11.76	13	11.76	12	11.76	11	11.76	30	11.76	26	11.76	11
11.78	167.25	11.78	17	11.78	13	11.78	15	11.78	14	11.78	24	11.78	8	11.78	28	11.78	13	11.78	12
11.8	168	11.8	17	11.8	23	11.8	18	11.8	15	11.8	16	11.8	17	11.8	33	11.8	23	11.8	12
11.82	172.5	11.82	17	11.82	16	11.82	21	11.82	16	11.82	13	11.82	14	11.82	25	11.82	16	11.82	19
11.84	168	11.84	14	11.84	11	11.84	16	11.84	23	11.84	22	11.84	10	11.84	27	11.84	11	11.84	15
11.86	178.5	11.86	24	11.86	18	11.86	21	11.86	17	11.86	15	11.86	9	11.86	17	11.86	18	11.86	13
11.88	173.25	11.88	19	11.88	13	11.88	23	11.88	32	11.88	17	11.88	17	11.88	21	11.88	13	11.88	11
11.9	174	11.9	15	11.9	16	11.9	20	11.9	15	11.9	18	11.9	21	11.9	20	11.9	16	11.9	13
11.92	170.25	11.92	19	11.92	19	11.92	15	11.92	27	11.92	21	11.92	16	11.92	22	11.92	19	11.92	17
11.94	168.75	11.94	27	11.94	19	11.94	27	11.94	29	11.94	21	11.94	15	11.94	31	11.94	19	11.94	12
11.96	161.25	11.96	13	11.96	15	11.96	18	11.96	13	11.96	29	11.96	12	11.96	26	11.96	15	11.96	9
11.98	165	11.98	24	11.98	21	11.98	21	11.98	20	11.98	26	11.98	13	11.98	24	11.98	21	11.98	15
12	168	12	19	12	24	12	15	12	12	12	17	12	16	12	20	12	24	12	11
12.02	172.5	12.02	24	12.02	16	12.02	20	12.02	18	12.02	18	12.02	10	12.02	19	12.02	16	12.02	9
12.04	168.75	12.04	13	12.04	15	12.04	19	12.04	7	12.04	15	12.04	9	12.04	20	12.04	15	12.04	9
12.06	165.75	12.06	17	12.06	17	12.06	20	12.06	17	12.06	18	12.06	12	12.06	27	12.06	17	12.06	9
12.08	169.5	12.08	13	12.08	19	12.08	21	12.08	16	12.08	15	12.08	9	12.08	21	12.08	19	12.08	7
12.1	168	12.1	16	12.1	11	12.1	16	12.1	17	12.1	20	12.1	9	12.1	17	12.1	11	12.1	5
12.12	168	12.12	24	12.12	7	12.12	12	12.12	13	12.12	22	12.12	10	12.12	13	12.12	7	12.12	10
12.14	174	12.14	10	12.14	14	12.14	18	12.14	20	12.14	17	12.14	8	12.14	22	12.14	14	12.14	7
12.16	171	12.16	12	12.16	14	12.16	23	12.16	13	12.16	20	12.16	6	12.16	21	12.16	14	12.16	15
12.18	168.75	12.18	12	12.18	20	12.18	12	12.18	14	12.18	17	12.18	9	12.18	12	12.18	20	12.18	10
12.2	168	12.2	13	12.2	17	12.2	17	12.2	15	12.2	16	12.2	12	12.2	13	12.2	17	12.2	4
12.22	166.5	12.22	10	12.22	21	12.22	25	12.22	17	12.22	24	12.22	8	12.22	14	12.22	21	12.22	8
12.24	171	12.24	16	12.24	17	12.24	20	12.24	16	12.24	12	12.24	7	12.24	12	12.24	17	12.24	18
12.26	162.75	12.26	19	12.26	16	12.26	13	12.26	14	12.26	18	12.26	11	12.26	20	12.26	16	12.26	8
12.28	165.75	12.28	19	12.28	21	12.28	17	12.28	10	12.28	10	12.28	13	12.28	21	12.28	21	12.28	15
12.3	168	12.3	20	12.3	16	12.3	20	12.3	21	12.3	17	12.3	17	12.3	26	12.3	16	12.3	7
12.32	166.5	12.32	13	12.32	13	12.32	13	12.32	19	12.32	14	12.32	19	12.32	20	12.32	13	12.32	11
12.34	166.5	12.34	18	12.34	15	12.34	21	12.34	11	12.34	12	12.34	9	12.34	22	12.34	15	12.34	5
12.36	165	12.36	16	12.36	11	12.36	21	12.36	11	12.36	18	12.36	4	12.36	15	12.36	11	12.36	6
12.38	162.75	12.38	13	12.38	19	12.38	19	12.38	16	12.38	16	12.38	7	12.38	15	12.38	19	12.38	16
12.4	172.5	12.4	13	12.4	5	12.4	9	12.4	16	12.4	15	12.4	4	12.4	14	12.4	5	12.4	18
12.42	171.75	12.42	20	12.42	12	12.42	15	12.42	18	12.42	16	12.42	12	12.42	24	12.42	12	12.42	10
12.44	162.75	12.44	17	12.44	11	12.44	15	12.44	16	12.44	22	12.44	7	12.44	11	12.44	11	12.44	8
12.46	176.25	12.46	20	12.46	19	12.46	15	12.46	16	12.46	17	12.46	17	12.46	26	12.46	19	12.46	12
12.48	168.75	12.48	18	12.48	11	12.48	17	12.48	17	12.48	21	12.48	11	12.48	14	12.48	11	12.48	15
12.5	170.25	12.5	19	12.5	16	12.5	19	12.5	15	12.5	15	12.5	15	12.5	27	12.5	16	12.5	15
12.52	166.5	12.52	11	12.52	7	12.52	23	12.52	19	12.52	17	12.52	14	12.52	20	12.52	7	12.52	13
12.54	168.75	12.54	15	12.54	21	12.54	16	12.54	15	12.54	21	12.54	12	12.54	17	12.54	21	12.54	9
12.56	174.75	12.56	12	12.56	12	12.56	16	12.56	25	12.56	13	12.56	16	12.56	19	12.56	12	12.56	6
12.58	171.75	12.58	17	12.58	15	12.58	24	12.58	17	12.58	23	12.58	6	12.58	15	12.58	15	12.58	6
12.6	168.75	12.6	8	12.6	17	12.6	13	12.6	16	12.6	14	12.6	5	12.6	25	12.6	17	12.6	12
12.62	163.5	12.62	12	12.62	13	12.62	16	12.62	20	12.62	22	12.62	10	12.62	19	12.62	13	12.62	13
12.64	169.5	12.64	14	12.64	9	12.64	8	12.64	13	12.64	16	12.64	10	12.64	16	12.64	9	12.64	11
12.66	171	12.66	14	12.66	17	12.66	12	12.66	8	12.66	13	12.66	11	12.66	18	12.66	17	12.66	8
12.68	167.25	12.68	15	12.68	15	12.68	18	12.68	15	12.68	15	12.68	8	12.68	15	12.68	15	12.68	9
12.7	174	12.7	15	12.7	13	12.7	18	12.7	16	12.7	20	12.7	3	12.7	15	12.7	13	12.7	11
12.72	170.25	12.72	10	12.72	18	12.72	16	12.72	8	12.72	19	12.72	8	12.72	20	12.72	18	12.72	9
12.74	169.5	12.74	12	12.74	16	12.74	16	12.74	6	12.74	23	12.74	7	12.74	16	12.74	16	12.74	8
12.76	169.5	12.76	14	12.76	15	12.76	8	12.76	15	12.76	13	12.76	7	12.76	16	12.76	15	12.76	10
12.78	171.75	12.78	19	12.78	11	12.78	13	12.78	15	12.78	22	12.78	11	12.78	23	12.78	11	12.78	11
12.8	170.25	12.8	12	12.8	22	12.8	16	12.8	11	12.8	13	12.8	12	12.8	16	12.8	22	12.8	13
12.82	162.75	12.82	9	12.82	15	12.82	7	12.82	12	12.82	14	12.82	9	12.82	16	12.82	15	12.82	10
12.84	163.5	12.84	16	12.84	8	12.84	15	12.84	10	12.84	15	12.84	12	12.84	17	12.84	8	12.84	10
12.86	171.75	12.86	12	12.86	22	12.86	15	12.86	11	12.86	13	12.86	11	12.86	9	12.86	22	12.86	15
12.88	171.75	12.88	7	12.88	8	12.88	13	12.88	14	12.88	13	12.88	12	12.88	16	12.88	8	12.88	13
12.9	179.25	12.9	12	12.9	10	12.9	10	12.9	10	12.9	19	12.9	14	12.9	15	12.9	10	12.9	7
12.92	183.75	12.92	5	12.92	13	12.92	15	12.92	17	12.92	10	12.92	10	12.92	15	12.92	13	12.92	17
12.94	180	12.94	16	12.94	13	12.94	21	12.94	13	12.94	12	12.94	19	12.94	17	12.94	13	12.94	7
12.96	178.5	12.96	17	12.96	19	12.96	16	12.96	15	12.96	15	12.96	11	12.96	16	12.96	19	12.96	4
12.98	173.25	12.98	18	12.98	11	12.98	15	12.98	15	12.98	8	12.98	15	12.98	20	12.98	11	12.98	7
13	174.75	13	20	13	18	13	25	13	13	13	12	13	9	13	11	13	18	13	7
13.02	176.25	13.02	13	13.02	14	13.02	9	13.02	11	13.02	21	13.02	11	13.02	23	13.02	14	13.02	10
13.04	177.75	13.04	11	13.04	17	13.04	22	13.04	19	13.04	15	13.04	17	13.04	18	13.04	17	13.04	15
13.06	187.5	13.06	19	13.06	9	13.06	18	13.06	10	13.06	17	13.06	13	13.06	22	13.06	9	13.06	12
13.08	187.5	13.08	15	13.08	25	13.08	30	13.08	18	13.08	18	13.08	9	13.08	18	13.08	25	13.08	22
13.1	188.25	13.1	25	13.1	19	13.1	43	13.1	17	13.1	25	13.1	20	13.1	28	13.1	19	13.1	27
13.12	186	13.12	20	13.12	19	13.12	26	13.12	24	13.12	13	13.12	22	13.12	26	13.12	19	13.12	28
13.14	188.25	13.14	31	13.14	16	13.14	23	13.14	16	13.14	15	13.14	26	13.14	29	13.14	16	13.14	26
13.16	196.5	13.16	29	13.16	33	13.16	45	13.16	24	13.16	25	13.16	23	13.16	39	13.16	33	13.16	19
13.18	191.25	13.18	35	13.18	39	13.18	38	13.18	30	13.18	24	13.18	31	13.18	36	13.18	39	13.18	40
13.2	192	13.2	40	13.2	38	13.2	34	13.2	30	13.2	22	13.2	47	13.2	27	13.2	38	13.2	32
13.22	184.5	13.22	33	13.22	36	13.22	41	13.22	36	13.22	32	13.22	37	13.22	33	13.22	36	13.22	42
13.24	179.25	13.24	41	13.24	39	13.24	34	13.24	43	13.24	34	13.24	42	13.24	44	13.24	39	13.24	26
13.26	171	13.26	28	13.26	48	13.26	28	13.26	37	13.26	40	13.26	27	13.26	43	13.26	48	13.26	30
13.28	177	13.28	32	13.28	41	13.28	29	13.28	35	13.28	46	13.28	33	13.28	22	13.28	41	13.28	26
13.3	179.25	13.3	31	13.3	39	13.3	17	13.3	35	13.3	47	13.3	16	13.3	26	13.3	39	13.3	22
13.32	170.25	13.32	25	13.32	30	13.32	24	13.32	38	13.32	27	13.32	16	13.32	25	13.32	30	13.32	11
13.34	168.75	13.34	22	13.34	18	13.34	21	13.34	28	13.34	32	13.34	17	13.34	18	13.34	18	13.34	16
13.36	171.75	13.36	24	13.36	17	13.36	22	13.36	20	13.36	20	13.36	12	13.36	23	13.36	17	13.36	10
13.38	178.5	13.38	17	13.38	27	13.38	16	13.38	22	13.38	17	13.38	13	13.38	20	13.38	27	13.38	13
13.4	174	13.4	28	13.4	17	13.4	16	13.4	18	13.4	18	13.4	12	13.4	20	13.4	17	13.4	12
13.42	158.25	13.42	13	13.42	13	13.42	14	13.42	26	13.42	20	13.42	9	13.42	18	13.42	13	13.42	11
13.44	171.75	13.44	22	13.44	12	13.44	10	13.44	11	13.44	14	13.44	14	13.44	18	13.44	12	13.44	8
13.46	168.75	13.46	15	13.46	17	13.46	20	13.46	18	13.46	21	13.46	17	13.46	15	13.46	17	13.46	10
13.48	176.25	13.48	18	13.48	14	13.48	14	13.48	5	13.48	17	13.48	11	13.48	14	13.48	14	13.48	11
13.5	163.5	13.5	11	13.5	18	13.5	12	13.5	9	13.5	16	13.5	9	13.5	19	13.5	18	13.5	9
13.52	171.75	13.52	8	13.52	13	13.52	16	13.52	21	13.52	22	13.52	14	13.52	11	13.52	13	13.52	6
13.54	168.75	13.54	8	13.54	13	13.54	17	13.54	14	13.54	8	13.54	14	13.54	10	13.54	13	13.54	5
13.56	172.5	13.56	16	13.56	13	13.56	16	13.56	10	13.56	19	13.56	6	13.56	14	13.56	13	13.56	9
13.58	169.5	13.58	13	13.58	10	13.58	11	13.58	12	13.58	12	13.58	19	13.58	12	13.58	10	13.58	14
13.6	169.5	13.6	11	13.6	15	13.6	21	13.6	17	13.6	7	13.6	7	13.6	21	13.6	15	13.6	8
13.62	177	13.62	23	13.62	13	13.62	9	13.62	17	13.62	10	13.62	13	13.62	15	13.62	13	13.62	12
13.64	177	13.64	11	13.64	8	13.64	21	13.64	12	13.64	10	13.64	11	13.64	18	13.64	8	13.64	9
13.66	172.5	13.66	19	13.66	10	13.66	20	13.66	13	13.66	12	13.66	9	13.66	13	13.66	10	13.66	17
13.68	176.25	13.68	9	13.68	7	13.68	18	13.68	20	13.68	16	13.68	9	13.68	17	13.68	7	13.68	10
13.7	183.75	13.7	21	13.7	15	13.7	20	13.7	17	13.7	12	13.7	14	13.7	18	13.7	15	13.7	12
13.72	177.75	13.72	20	13.72	13	13.72	18	13.72	12	13.72	11	13.72	19	13.72	18	13.72	13	13.72	19
13.74	177.75	13.74	16	13.74	12	13.74	24	13.74	14	13.74	9	13.74	14	13.74	20	13.74	12	13.74	15
13.76	183.75	13.76	30	13.76	13	13.76	20	13.76	15	13.76	11	13.76	21	13.76	22	13.76	13	13.76	15
13.78	198.75	13.78	23	13.78	23	13.78	31	13.78	19	13.78	16	13.78	26	13.78	26	13.78	23	13.78	24
13.8	188.25	13.8	24	13.8	28	13.8	38	13.8	27	13.8	21	13.8	27	13.8	22	13.8	28	13.8	29
13.82	204	13.82	31	13.82	16	13.82	37	13.82	19	13.82	22	13.82	32	13.82	42	13.82	16	13.82	35
13.84	212.25	13.84	34	13.84	40	13.84	45	13.84	34	13.84	17	13.84	33	13.84	34	13.84	40	13.84	35
13.86	205.5	13.86	48	13.86	28	13.86	33	13.86	35	13.86	28	13.86	43	13.86	28	13.86	28	13.86	47
13.88	215.25	13.88	35	13.88	37	13.88	44	13.88	46	13.88	41	13.88	44	13.88	64	13.88	37	13.88	55
13.9	225.75	13.9	47	13.9	42	13.9	45	13.9	32	13.9	34	13.9	47	13.9	47	13.9	42	13.9	60
13.92	193.5	13.92	55	13.92	42	13.92	54	13.92	51	13.92	42	13.92	45	13.92	61	13.92	42	13.92	62
13.94	198.75	13.94	48	13.94	62	13.94	48	13.94	53	13.94	40	13.94	39	13.94	53	13.94	62	13.94	38
13.96	187.5	13.96	57	13.96	61	13.96	45	13.96	60	13.96	62	13.96	26	13.96	55	13.96	61	13.96	54
13.98	174	13.98	56	13.98	63	13.98	28	13.98	66	13.98	49	13.98	45	13.98	55	13.98	63	13.98	36
14	175.5	14	49	14	58	14	29	14	70	14	81	14	37	14	41	14	58	14	25
14.02	160.5	14.02	44	14.02	52	14.02	24	14.02	59	14.02	58	14.02	36	14.02	43	14.02	52	14.02	26
14.04	172.5	14.04	35	14.04	36	14.04	21	14.04	53	14.04	60	14.04	15	14.04	35	14.04	36	14.04	12
14.06	172.5	14.06	33	14.06	34	14.06	22	14.06	37	14.06	54	14.06	24	14.06	26	14.06	34	14.06	18
14.08	174	14.08	20	14.08	27	14.08	8	14.08	33	14.08	35	14.08	19	14.08	24	14.08	27	14.08	17
14.1	168	14.1	30	14.1	30	14.1	20	14.1	23	14.1	25	14.1	20	14.1	22	14.1	30	14.1	19
14.12	174	14.12	26	14.12	21	14.12	13	14.12	21	14.12	24	14.12	12	14.12	22	14.12	21	14.12	12
14.14	168.75	14.14	21	14.14	20	14.14	16	14.14	16	14.14	22	14.14	10	14.14	21	14.14	20	14.14	19
14.16	170.25	14.16	20	14.16	10	14.16	19	14.16	14	14.16	19	14.16	5	14.16	14	14.16	10	14.16	13
14.18	168.75	14.18	26	14.18	10	14.18	23	14.18	19	14.18	26	14.18	9	14.18	10	14.18	10	14.18	7
14.2	169.5	14.2	21	14.2	14	14.2	12	14.2	27	14.2	18	14.2	15	14.2	13	14.2	14	14.2	4
14.22	180.75	14.22	16	14.22	24	14.22	18	14.22	15	14.22	26	14.22	5	14.22	17	14.22	24	14.22	9
14.24	166.5	14.24	18	14.24	7	14.24	9	14.24	17	14.24	11	14.24	17	14.24	14	14.24	7	14.24	16
14.26	164.25	14.26	16	14.26	15	14.26	14	14.26	11	14.26	15	14.26	9	14.26	18	14.26	15	14.26	11
14.28	177	14.28	14	14.28	10	14.28	12	14.28	12	14.28	13	14.28	9	14.28	13	14.28	10	14.28	6
14.3	174.75	14.3	16	14.3	16	14.3	22	14.3	11	14.3	10	14.3	12	14.3	12	14.3	16	14.3	8
14.32	168	14.32	17	14.32	9	14.32	16	14.32	9	14.32	11	14.32	8	14.32	16	14.32	9	14.32	10
14.34	168.75	14.34	13	14.34	12	14.34	22	14.34	12	14.34	21	14.34	13	14.34	10	14.34	12	14.34	14
14.36	175.5	14.36	16	14.36	19	14.36	13	14.36	12	14.36	7	14.36	12	14.36	18	14.36	19	14.36	16
14.38	183.75	14.38	15	14.38	12	14.38	10	14.38	20	14.38	11	14.38	13	14.38	11	14.38	12	14.38	16
14.4	173.25	14.4	16	14.4	11	14.4	12	14.4	12	14.4	13	14.4	11	14.4	16	14.4	11	14.4	10
14.42	177.75	14.42	16	14.42	8	14.42	18	14.42	17	14.42	10	14.42	14	14.42	17	14.42	8	14.42	7
14.44	168	14.44	12	14.44	13	14.44	7	14.44	13	14.44	16	14.44	11	14.44	15	14.44	13	14.44	9
14.46	173.25	14.46	13	14.46	18	14.46	12	14.46	14	14.46	13	14.46	18	14.46	9	14.46	18	14.46	14
14.48	176.25	14.48	24	14.48	14	14.48	21	14.48	15	14.48	14	14.48	17	14.48	10	14.48	14	14.48	10
14.5	173.25	14.5	16	14.5	12	14.5	15	14.5	17	14.5	13	14.5	23	14.5	15	14.5	12	14.5	10
14.52	179.25	14.52	15	14.52	18	14.52	18	14.52	19	14.52	12	14.52	20	14.52	23	14.52	18	14.52	21
14.54	185.25	14.54	20	14.54	20	14.54	23	14.54	15	14.54	17	14.54	14	14.54	14	14.54	20	14.54	19
14.56	183.75	14.56	12	14.56	21	14.56	33	14.56	15	14.56	17	14.56	16	14.56	23	14.56	21	14.56	15
14.58	201	14.58	18	14.58	21	14.58	28	14.58	21	14.58	17	14.58	27	14.58	18	14.58	21	14.58	24
14.6	189.75	14.6	21	14.6	25	14.6	38	14.6	36	14.6	19	14.6	26	14.6	33	14.6	25	14.6	21
14.62	198.75	14.62	36	14.62	34	14.62	43	14.62	21	14.62	26	14.62	31	14.62	18	14.62	34	14.62	30
14.64	213	14.64	25	14.64	29	14.64	55	14.64	23	14.64	22	14.64	27	14.64	42	14.64	29	14.64	45
14.66	233.25	14.66	37	14.66	32	14.66	64	14.66	27	14.66	24	14.66	30	14.66	56	14.66	32	14.66	34
14.68	222.75	14.68	50	14.68	42	14.68	53	14.68	51	14.68	36	14.68	42	14.68	40	14.68	42	14.68	49
14.7	226.5	14.7	48	14.7	33	14.7	60	14.7	37	14.7	34	14.7	53	14.7	54	14.7	33	14.7	69
14.72	233.25	14.72	46	14.72	50	14.72	60	14.72	57	14.72	28	14.72	66	14.72	60	14.72	50	14.72	73
14.74	221.25	14.74	60	14.74	58	14.74	59	14.74	73	14.74	49	14.74	56	14.74	69	14.74	58	14.74	62
14.76	205.5	14.76	72	14.76	67	14.76	40	14.76	62	14.76	56	14.76	72	14.76	76	14.76	67	14.76	74
14.78	201.75	14.78	71	14.78	62	14.78	53	14.78	66	14.78	64	14.78	65	14.78	76	14.78	62	14.78	73
14.8	196.5	14.8	76	14.8	80	14.8	47	14.8	63	14.8	77	14.8	67	14.8	78	14.8	80	14.8	65
14.82	186.75	14.82	59	14.82	77	14.82	47	14.82	67	14.82	89	14.82	65	14.82	69	14.82	77	14.82	70
14.84	185.25	14.84	69	14.84	87	14.84	40	14.84	81	14.84	75	14.84	58	14.84	69	14.84	87	14.84	56
14.86	184.5	14.86	56	14.86	78	14.86	35	14.86	86	14.86	80	14.86	44	14.86	58	14.86	78	14.86	47
14.88	179.25	14.88	56	14.88	70	14.88	51	14.88	71	14.88	82	14.88	46	14.88	43	14.88	70	14.88	32
14.9	183	14.9	48	14.9	55	14.9	30	14.9	66	14.9	86	14.9	39	14.9	34	14.9	55	14.9	34
14.92	185.25	14.92	37	14.92	44	14.92	38	14.92	63	14.92	68	14.92	35	14.92	46	14.92	44	14.92	36
14.94	179.25	14.94	46	14.94	59	14.94	25	14.94	42	14.94	57	14.94	35	14.94	35	14.94	59	14.94	38
14.96	180	14.96	34	14.96	48	14.96	23	14.96	50	14.96	69	14.96	36	14.96	37	14.96	48	14.96	29
14.98	180	14.98	35	14.98	41	14.98	23	14.98	49	14.98	45	14.98	26	14.98	31	14.98	41	14.98	25
15	177	15	31	15	44	15	12	15	38	15	54	15	27	15	37	15	44	15	27
15.02	173.25	15.02	27	15.02	34	15.02	22	15.02	36	15.02	41	15.02	17	15.02	25	15.02	34	15.02	13
15.04	167.25	15.04	20	15.04	25	15.04	17	15.04	31	15.04	41	15.04	23	15.04	20	15.04	25	15.04	15
15.06	167.25	15.06	29	15.06	23	15.06	19	15.06	25	15.06	32	15.06	19	15.06	14	15.06	23	15.06	16
15.08	166.5	15.08	23	15.08	21	15.08	12	15.08	24	15.08	27	15.08	22	15.08	16	15.08	21	15.08	5
15.1	170.25	15.1	23	15.1	24	15.1	16	15.1	19	15.1	25	15.1	14	15.1	13	15.1	24	15.1	10
15.12	172.5	15.12	7	15.12	13	15.12	5	15.12	28	15.12	13	15.12	12	15.12	12	15.12	13	15.12	18
15.14	174	15.14	16	15.14	11	15.14	13	15.14	13	15.14	15	15.14	11	15.14	15	15.14	11	15.14	18
15.16	165.75	15.16	19	15.16	19	15.16	12	15.16	13	15.16	17	15.16	11	15.16	14	15.16	19	15.16	10
15.18	171.75	15.18	13	15.18	14	15.18	18	15.18	15	15.18	15	15.18	16	15.18	17	15.18	14	15.18	9
15.2	175.5	15.2	13	15.2	7	15.2	17	15.2	12	15.2	9	15.2	7	15.2	13	15.2	7	15.2	13
15.22	172.5	15.22	15	15.22	17	15.22	12	15.22	22	15.22	18	15.22	12	15.22	12	15.22	17	15.22	17
15.24	173.25	15.24	12	15.24	16	15.24	11	15.24	12	15.24	14	15.24	13	15.24	17	15.24	16	15.24	6
15.26	171.75	15.26	13	15.26	18	15.26	13	15.26	11	15.26	22	15.26	10	15.26	14	15.26	18	15.26	14
15.28	179.25	15.28	15	15.28	23	15.28	11	15.28	16	15.28	17	15.28	12	15.28	9	15.28	23	15.28	18
15.3	177.75	15.3	19	15.3	9	15.3	20	15.3	22	15.3	14	15.3	11	15.3	21	15.3	9	15.3	7
15.32	185.25	15.32	14	15.32	17	15.32	28	15.32	22	15.32	9	15.32	13	15.32	20	15.32	17	15.32	16
15.34	179.25	15.34	19	15.34	17	15.34	25	15.34	13	15.34	13	15.34	20	15.34	9	15.34	17	15.34	16
15.36	192.75	15.36	20	15.36	19	15.36	31	15.36	11	15.36	19	15.36	17	15.36	22	15.36	19	15.36	9
15.38	189.75	15.38	25	15.38	13	15.38	26	15.38	22	15.38	13	15.38	27	15.38	22	15.38	13	15.38	33
15.4	204.75	15.4	35	15.4	17	15.4	22	15.4	24	15.4	24	15.4	27	15.4	22	15.4	17	15.4	17
15.42	206.25	15.42	27	15.42	26	15.42	32	15.42	18	15.42	26	15.42	30	15.42	23	15.42	26	15.42	24
15.44	197.25	15.44	35	15.44	25	15.44	28	15.44	24	15.44	12	15.44	33	15.44	20	15.44	25	15.44	28
15.46	191.25	15.46	33	15.46	25	15.46	41	15.46	35	15.46	29	15.46	30	15.46	37	15.46	25	15.46	40
15.48	191.25	15.48	38	15.48	34	15.48	38	15.48	33	15.48	20	15.48	34	15.48	48	15.48	34	15.48	38
15.5	204.75	15.5	36	15.5	46	15.5	27	15.5	27	15.5	30	15.5	32	15.5	40	15.5	46	15.5	37
15.52	198.75	15.52	38	15.52	40	15.52	43	15.52	46	15.52	34	15.52	44	15.52	43	15.52	40	15.52	34
15.54	197.25	15.54	50	15.54	34	15.54	30	15.54	35	15.54	45	15.54	59	15.54	58	15.54	34	15.54	37
15.56	184.5	15.56	34	15.56	31	15.56	27	15.56	45	15.56	47	15.56	33	15.56	36	15.56	31	15.56	24
15.58	189.75	15.58	39	15.58	42	15.58	21	15.58	31	15.58	48	15.58	34	15.58	35	15.58	42	15.58	36
15.6	178.5	15.6	42	15.6	48	15.6	29	15.6	45	15.6	66	15.6	30	15.6	44	15.6	48	15.6	38
15.62	188.25	15.62	33	15.62	40	15.62	23	15.62	32	15.62	43	15.62	24	15.62	38	15.62	40	15.62	25
15.64	177.75	15.64	39	15.64	46	15.64	27	15.64	34	15.64	39	15.64	27	15.64	21	15.64	46	15.64	34
15.66	184.5	15.66	33	15.66	38	15.66	28	15.66	34	15.66	33	15.66	22	15.66	32	15.66	38	15.66	15
15.68	176.25	15.68	35	15.68	28	15.68	18	15.68	23	15.68	41	15.68	25	15.68	21	15.68	28	15.68	14
15.7	196.5	15.7	34	15.7	20	15.7	22	15.7	28	15.7	28	15.7	24	15.7	25	15.7	20	15.7	13
15.72	189	15.72	24	15.72	18	15.72	28	15.72	20	15.72	24	15.72	25	15.72	28	15.72	18	15.72	18
15.74	195.75	15.74	30	15.74	21	15.74	33	15.74	27	15.74	24	15.74	24	15.74	23	15.74	21	15.74	18
15.76	193.5	15.76	26	15.76	20	15.76	44	15.76	22	15.76	13	15.76	18	15.76	20	15.76	20	15.76	19
15.78	203.25	15.78	27	15.78	24	15.78	28	15.78	27	15.78	19	15.78	43	15.78	30	15.78	24	15.78	28
15.8	197.25	15.8	28	15.8	25	15.8	37	15.8	34	15.8	27	15.8	33	15.8	26	15.8	25	15.8	36
15.82	204	15.82	37	15.82	28	15.82	37	15.82	26	15.82	24	15.82	35	15.82	34	15.82	28	15.82	51
15.84	207	15.84	41	15.84	37	15.84	44	15.84	31	15.84	30	15.84	37	15.84	39	15.84	37	15.84	30
15.86	203.25	15.86	38	15.86	32	15.86	42	15.86	36	15.86	37	15.86	38	15.86	46	15.86	32	15.86	44
15.88	192	15.88	48	15.88	55	15.88	34	15.88	43	15.88	40	15.88	34	15.88	47	15.88	55	15.88	43
15.9	191.25	15.9	70	15.9	53	15.9	47	15.9	47	15.9	38	15.9	58	15.9	68	15.9	53	15.9	36
15.92	188.25	15.92	58	15.92	50	15.92	33	15.92	57	15.92	54	15.92	51	15.92	67	15.92	50	15.92	47
15.94	186.75	15.94	38	15.94	62	15.94	34	15.94	59	15.94	72	15.94	52	15.94	54	15.94	62	15.94	43
15.96	183	15.96	39	15.96	52	15.96	28	15.96	54	15.96	61	15.96	34	15.96	47	15.96	52	15.96	33
15.98	187.5	15.98	35	15.98	47	15.98	18	15.98	58	15.98	72	15.98	31	15.98	38	15.98	47	15.98	36
16	177	16	32	16	53	16	32	16	50	16	77	16	36	16	46	16	53	16	32
16.02	164.25	16.02	30	16.02	30	16.02	23	16.02	61	16.02	59	16.02	20	16.02	41	16.02	30	16.02	27
16.04	183.75	16.04	29	16.04	43	16.04	24	16.04	41	16.04	46	16.04	22	16.04	21	16.04	43	16.04	21
16.06	176.25	16.06	37	16.06	39	16.06	18	16.06	45	16.06	43	16.06	18	16.06	27	16.06	39	16.06	19
16.08	171	16.08	34	16.08	31	16.08	12	16.08	30	16.08	32	16.08	19	16.08	24	16.08	31	16.08	23
16.1	170.25	16.1	27	16.1	22	16.1	14	16.1	21	16.1	32	16.1	20	16.1	15	16.1	22	16.1	12
16.12	170.25	16.12	22	16.12	22	16.12	13	16.12	17	16.12	20	16.12	11	16.12	19	16.12	22	16.12	9
16.14	168	16.14	20	16.14	25	16.14	17	16.14	22	16.14	13	16.14	12	16.14	10	16.14	25	16.14	13
16.16	170.25	16.16	23	16.16	15	16.16	13	16.16	17	16.16	16	16.16	10	16.16	10	16.16	15	16.16	14
16.18	172.5	16.18	13	16.18	14	16.18	13	16.18	13	16.18	19	16.18	12	16.18	16	16.18	14	16.18	8
16.2	180	16.2	13	16.2	12	16.2	10	16.2	16	16.2	14	16.2	12	16.2	18	16.2	12	16.2	13
16.22	174	16.22	14	16.22	20	16.22	10	16.22	13	16.22	17	16.22	16	16.22	15	16.22	20	16.22	10
16.24	173.25	16.24	16	16.24	13	16.24	6	16.24	13	16.24	17	16.24	12	16.24	13	16.24	13	16.24	12
16.26	171.75	16.26	9	16.26	12	16.26	13	16.26	18	16.26	6	16.26	8	16.26	17	16.26	12	16.26	17
16.28	170.25	16.28	12	16.28	17	16.28	9	16.28	6	16.28	16	16.28	9	16.28	11	16.28	17	16.28	7
16.3	162.75	16.3	12	16.3	15	16.3	11	16.3	12	16.3	19	16.3	11	16.3	15	16.3	15	16.3	9
16.32	165	16.32	13	16.32	8	16.32	13	16.32	12	16.32	11	16.32	13	16.32	12	16.32	8	16.32	10
16.34	170.25	16.34	12	16.34	8	16.34	18	16.34	20	16.34	18	16.34	9	16.34	16	16.34	8	16.34	16
16.36	169.5	16.36	9	16.36	15	16.36	13	16.36	12	16.36	15	16.36	13	16.36	14	16.36	15	16.36	16
16.38	172.5	16.38	23	16.38	13	16.38	17	16.38	9	16.38	20	16.38	19	16.38	12	16.38	13	16.38	12
16.4	171	16.4	14	16.4	8	16.4	9	16.4	18	16.4	15	16.4	14	16.4	13	16.4	8	16.4	14
16.42	177	16.42	15	16.42	14	16.42	12	16.42	21	16.42	10	16.42	5	16.42	20	16.42	14	16.42	13
16.44	166.5	16.44	17	16.44	17	16.44	10	16.44	14	16.44	18	16.44	11	16.44	16	16.44	17	16.44	19
16.46	189.75	16.46	21	16.46	13	16.46	19	16.46	22	16.46	20	16.46	15	16.46	16	16.46	13	16.46	13
16.48	178.5	16.48	13	16.48	16	16.48	12	16.48	16	16.48	12	16.48	15	16.48	23	16.48	16	16.48	16
16.5	173.25	16.5	23	16.5	21	16.5	16	16.5	11	16.5	19	16.5	9	16.5	20	16.5	21	16.5	16
16.52	174	16.52	21	16.52	19	16.52	18	16.52	25	16.52	20	16.52	21	16.52	19	16.52	19	16.52	17
16.54	169.5	16.54	14	16.54	20	16.54	15	16.54	19	16.54	17	16.54	23	16.54	14	16.54	20	16.54	12
16.56	173.25	16.56	14	16.56	20	16.56	28	16.56	20	16.56	27	16.56	23	16.56	18	16.56	20	16.56	13
16.58	170.25	16.58	18	16.58	25	16.58	14	16.58	19	16.58	30	16.58	27	16.58	21	16.58	25	16.58	23
16.6	171	16.6	16	16.6	19	16.6	16	16.6	23	16.6	15	16.6	14	16.6	17	16.6	19	16.6	18
16.62	170.25	16.62	19	16.62	22	16.62	12	16.62	29	16.62	26	16.62	8	16.62	14	16.62	22	16.62	17
16.64	166.5	16.64	13	16.64	15	16.64	11	16.64	26	16.64	25	16.64	15	16.64	15	16.64	15	16.64	14
16.66	169.5	16.66	15	16.66	15	16.66	17	16.66	13	16.66	25	16.66	7	16.66	18	16.66	15	16.66	11
16.68	168.75	16.68	21	16.68	14	16.68	8	16.68	19	16.68	20	16.68	8	16.68	11	16.68	14	16.68	14
16.7	162.75	16.7	24	16.7	11	16.7	9	16.7	16	16.7	14	16.7	18	16.7	10	16.7	11	16.7	14
16.72	166.5	16.72	12	16.72	17	16.72	9	16.72	14	16.72	17	16.72	8	16.72	15	16.72	17	16.72	10
16.74	165.75	16.74	9	16.74	11	16.74	9	16.74	13	16.74	15	16.74	15	16.74	12	16.74	11	16.74	10
16.76	165	16.76	12	16.76	9	16.76	9	16.76	13	16.76	7	16.76	9	16.76	10	16.76	9	16.76	4
16.78	162.75	16.78	8	16.78	10	16.78	13	16.78	12	16.78	13	16.78	10	16.78	7	16.78	10	16.78	11
16.8	168.75	16.8	12	16.8	11	16.8	10	16.8	8	16.8	16	16.8	9	16.8	12	16.8	11	16.8	10
16.82	168	16.82	9	16.82	11	16.82	9	16.82	11	16.82	14	16.82	14	16.82	6	16.82	11	16.82	6
16.84	162	16.84	7	16.84	5	16.84	14	16.84	13	16.84	11	16.84	7	16.84	19	16.84	5	16.84	8
16.86	164.25	16.86	9	16.86	7	16.86	12	16.86	17	16.86	5	16.86	7	16.86	8	16.86	7	16.86	5
16.88	167.25	16.88	8	16.88	7	16.88	11	16.88	9	16.88	10	16.88	3	16.88	12	16.88	7	16.88	11
16.9	164.25	16.9	17	16.9	4	16.9	11	16.9	12	16.9	10	16.9	10	16.9	11	16.9	4	16.9	8
16.92	163.5	16.92	10	16.92	9	16.92	8	16.92	8	16.92	10	16.92	11	16.92	7	16.92	9	16.92	13
16.94	165.75	16.94	7	16.94	7	16.94	13	16.94	10	16.94	14	16.94	7	16.94	12	16.94	7	16.94	8
16.96	166.5	16.96	14	16.96	5	16.96	5	16.96	9	16.96	9	16.96	10	16.96	13	16.96	5	16.96	10
16.98	165.75	16.98	8	16.98	6	16.98	9	16.98	14	16.98	16	16.98	6	16.98	9	16.98	6	16.98	12
17	169.5	17	13	17	4	17	8	17	12	17	10	17	7	17	14	17	4	17	8
17.02	162.75	17.02	9	17.02	11	17.02	11	17.02	9	17.02	6	17.02	6	17.02	4	17.02	11	17.02	9
17.04	161.25	17.04	6	17.04	8	17.04	8	17.04	9	17.04	8	17.04	10	17.04	10	17.04	8	17.04	8
17.06	165	17.06	8	17.06	9	17.06	12	17.06	9	17.06	9	17.06	18	17.06	11	17.06	9	17.06	10
17.08	171.75	17.08	3	17.08	9	17.08	12	17.08	9	17.08	10	17.08	15	17.08	10	17.08	9	17.08	15
17.1	163.5	17.1	15	17.1	9	17.1	11	17.1	11	17.1	19	17.1	13	17.1	10	17.1	9	17.1	8
17.12	175.5	17.12	12	17.12	9	17.12	17	17.12	11	17.12	11	17.12	7	17.12	7	17.12	9	17.12	8
17.14	165	17.14	17	17.14	14	17.14	18	17.14	13	17.14	11	17.14	12	17.14	9	17.14	14	17.14	8
17.16	174	17.16	8	17.16	8	17.16	8	17.16	11	17.16	7	17.16	14	17.16	13	17.16	8	17.16	11
17.18	162.75	17.18	9	17.18	9	17.18	11	17.18	16	17.18	8	17.18	14	17.18	7	17.18	9	17.18	10
17.2	166.5	17.2	12	17.2	17	17.2	15	17.2	16	17.2	14	17.2	10	17.2	8	17.2	17	17.2	7
17.22	170.25	17.22	17	17.22	12	17.22	17	17.22	13	17.22	17	17.22	13	17.22	9	17.22	12	17.22	10
17.24	171.75	17.24	16	17.24	20	17.24	16	17.24	16	17.24	6	17.24	5	17.24	18	17.24	20	17.24	10
17.26	166.5	17.26	12	17.26	13	17.26	9	17.26	22	17.26	15	17.26	11	17.26	6	17.26	13	17.26	14
17.28	179.25	17.28	21	17.28	14	17.28	14	17.28	19	17.28	13	17.28	10	17.28	15	17.28	14	17.28	12
17.3	168.75	17.3	14	17.3	21	17.3	11	17.3	22	17.3	10	17.3	9	17.3	18	17.3	21	17.3	13
17.32	168	17.32	19	17.32	15	17.32	13	17.32	19	17.32	18	17.32	13	17.32	12	17.32	15	17.32	6
17.34	168.75	17.34	14	17.34	19	17.34	9	17.34	15	17.34	17	17.34	13	17.34	14	17.34	19	17.34	10
17.36	171	17.36	14	17.36	18	17.36	11	17.36	17	17.36	14	17.36	17	17.36	14	17.36	18	17.36	9
17.38	166.5	17.38	20	17.38	4	17.38	13	17.38	10	17.38	13	17.38	9	17.38	12	17.38	4	17.38	7
17.4	163.5	17.4	14	17.4	15	17.4	15	17.4	12	17.4	16	17.4	12	17.4	20	17.4	15	17.4	6
17.42	174	17.42	12	17.42	10	17.42	16	17.42	9	17.42	9	17.42	8	17.42	11	17.42	10	17.42	10
17.44	166.5	17.44	15	17.44	6	17.44	11	17.44	12	17.44	15	17.44	9	17.44	8	17.44	6	17.44	9
17.46	172.5	17.46	19	17.46	8	17.46	13	17.46	9	17.46	7	17.46	5	17.46	9	17.46	8	17.46	11
17.48	173.25	17.48	10	17.48	9	17.48	8	17.48	10	17.48	10	17.48	15	17.48	8	17.48	9	17.48	9
17.5	178.5	17.5	15	17.5	12	17.5	14	17.5	23	17.5	11	17.5	17	17.5	19	17.5	12	17.5	10
17.52	175.5	17.52	17	17.52	19	17.52	21	17.52	14	17.52	14	17.52	11	17.52	10	17.52	19	17.52	15
17.54	184.5	17.54	18	17.54	23	17.54	21	17.54	7	17.54	13	17.54	23	17.54	13	17.54	23	17.54	9
17.56	182.25	17.56	19	17.56	21	17.56	16	17.56	15	17.56	14	17.56	21	17.56	26	17.56	21	17.56	24
17.58	180	17.58	26	17.58	10	17.58	19	17.58	18	17.58	11	17.58	22	17.58	24	17.58	10	17.58	15
17.6	178.5	17.6	23	17.6	19	17.6	26	17.6	25	17.6	18	17.6	23	17.6	19	17.6	19	17.6	21
17.62	174	17.62	20	17.62	20	17.62	26	17.62	23	17.62	21	17.62	27	17.62	31	17.62	20	17.62	30
17.64	176.25	17.64	32	17.64	23	17.64	22	17.64	27	17.64	30	17.64	22	17.64	16	17.64	23	17.64	22
17.66	171.75	17.66	31	17.66	22	17.66	24	17.66	20	17.66	21	17.66	18	17.66	23	17.66	22	17.66	15
17.68	183.75	17.68	14	17.68	20	17.68	14	17.68	29	17.68	24	17.68	25	17.68	24	17.68	20	17.68	29
17.7	181.5	17.7	30	17.7	24	17.7	23	17.7	31	17.7	33	17.7	22	17.7	25	17.7	24	17.7	22
17.72	180	17.72	25	17.72	23	17.72	26	17.72	28	17.72	41	17.72	21	17.72	23	17.72	23	17.72	28
17.74	180.75	17.74	30	17.74	20	17.74	22	17.74	26	17.74	34	17.74	26	17.74	30	17.74	20	17.74	22
17.76	184.5	17.76	29	17.76	20	17.76	18	17.76	30	17.76	34	17.76	26	17.76	29	17.76	20	17.76	22
17.78	180.75	17.78	38	17.78	37	17.78	36	17.78	22	17.78	30	17.78	37	17.78	28	17.78	37	17.78	29
17.8	181.5	17.8	42	17.8	29	17.8	30	17.8	30	17.8	36	17.8	26	17.8	43	17.8	29	17.8	31
17.82	175.5	17.82	32	17.82	40	17.82	23	17.82	28	17.82	39	17.82	30	17.82	28	17.82	40	17.82	34
17.84	167.25	17.84	37	17.84	27	17.84	16	17.84	33	17.84	32	17.84	24	17.84	40	17.84	27	17.84	21
17.86	167.25	17.86	27	17.86	31	17.86	15	17.86	35	17.86	36	17.86	29	17.86	28	17.86	31	17.86	31
17.88	166.5	17.88	23	17.88	23	17.88	15	17.88	30	17.88	51	17.88	23	17.88	16	17.88	23	17.88	22
17.9	163.5	17.9	16	17.9	27	17.9	16	17.9	33	17.9	41	17.9	17	17.9	19	17.9	27	17.9	13
17.92	164.25	17.92	13	17.92	17	17.92	15	17.92	27	17.92	27	17.92	15	17.92	15	17.92	17	17.92	10
17.94	166.5	17.94	24	17.94	18	17.94	13	17.94	27	17.94	32	17.94	12	17.94	17	17.94	18	17.94	15
17.96	162.75	17.96	13	17.96	20	17.96	8	17.96	20	17.96	27	17.96	11	17.96	15	17.96	20	17.96	6
17.98	164.25	17.98	13	17.98	17	17.98	10	17.98	27	17.98	20	17.98	4	17.98	11	17.98	17	17.98	14
18	167.25	18	13	18	12	18	9	18	14	18	17	18	12	18	14	18	12	18	16
18.02	168	18.02	9	18.02	11	18.02	9	18.02	11	18.02	17	18.02	6	18.02	15	18.02	11	18.02	3
18.04	165	18.04	15	18.04	16	18.04	12	18.04	10	18.04	11	18.04	12	18.04	11	18.04	16	18.04	4
18.06	160.5	18.06	9	18.06	10	18.06	7	18.06	9	18.06	16	18.06	9	18.06	11	18.06	10	18.06	9
18.08	170.25	18.08	11	18.08	10	18.08	8	18.08	5	18.08	9	18.08	6	18.08	12	18.08	10	18.08	12
18.1	163.5	18.1	9	18.1	9	18.1	11	18.1	8	18.1	14	18.1	8	18.1	9	18.1	9	18.1	7
18.12	168.75	18.12	11	18.12	11	18.12	10	18.12	8	18.12	12	18.12	7	18.12	12	18.12	11	18.12	11
18.14	173.25	18.14	7	18.14	10	18.14	9	18.14	17	18.14	13	18.14	6	18.14	10	18.14	10	18.14	9
18.16	164.25	18.16	8	18.16	17	18.16	13	18.16	16	18.16	14	18.16	7	18.16	13	18.16	17	18.16	11
18.18	159	18.18	15	18.18	7	18.18	12	18.18	17	18.18	12	18.18	11	18.18	11	18.18	7	18.18	9
18.2	160.5	18.2	8	18.2	10	18.2	10	18.2	3	18.2	4	18.2	9	18.2	11	18.2	10	18.2	8
18.22	165.75	18.22	6	18.22	16	18.22	9	18.22	9	18.22	11	18.22	8	18.22	10	18.22	16	18.22	11
18.24	166.5	18.24	8	18.24	10	18.24	7	18.24	10	18.24	13	18.24	8	18.24	12	18.24	10	18.24	11
18.26	168.75	18.26	10	18.26	6	18.26	6	18.26	14	18.26	19	18.26	7	18.26	7	18.26	6	18.26	4
18.28	164.25	18.28	5	18.28	11	18.28	8	18.28	10	18.28	11	18.28	4	18.28	14	18.28	11	18.28	9
18.3	162	18.3	10	18.3	7	18.3	12	18.3	7	18.3	16	18.3	7	18.3	7	18.3	7	18.3	11
18.32	165.75	18.32	3	18.32	8	18.32	13	18.32	17	18.32	9	18.32	12	18.32	5	18.32	8	18.32	12
18.34	169.5	18.34	7	18.34	12	18.34	8	18.34	7	18.34	7	18.34	6	18.34	1	18.34	12	18.34	8
18.36	163.5	18.36	14	18.36	11	18.36	3	18.36	5	18.36	10	18.36	9	18.36	7	18.36	11	18.36	5
18.38	160.5	18.38	8	18.38	6	18.38	8	18.38	6	18.38	8	18.38	12	18.38	8	18.38	6	18.38	6
18.4	166.5	18.4	9	18.4	10	18.4	7	18.4	10	18.4	9	18.4	8	18.4	8	18.4	10	18.4	6
18.42	162.75	18.42	8	18.42	6	18.42	6	18.42	7	18.42	6	18.42	11	18.42	10	18.42	6	18.42	3
18.44	161.25	18.44	7	18.44	11	18.44	12	18.44	6	18.44	7	18.44	4	18.44	6	18.44	11	18.44	2
18.46	167.25	18.46	12	18.46	7	18.46	5	18.46	12	18.46	4	18.46	5	18.46	9	18.46	7	18.46	6
18.48	166.5	18.48	9	18.48	10	18.48	7	18.48	6	18.48	10	18.48	4	18.48	14	18.48	10	18.48	6
18.5	165.75	18.5	6	18.5	9	18.5	10	18.5	10	18.5	10	18.5	4	18.5	10	18.5	9	18.5	10
18.52	162	18.52	11	18.52	10	18.52	6	18.52	8	18.52	8	18.52	8	18.52	7	18.52	10	18.52	4
18.54	163.5	18.54	5	18.54	9	18.54	10	18.54	9	18.54	13	18.54	6	18.54	13	18.54	9	18.54	9
18.56	157.5	18.56	11	18.56	11	18.56	6	18.56	13	18.56	6	18.56	5	18.56	6	18.56	11	18.56	6
18.58	161.25	18.58	8	18.58	16	18.58	10	18.58	7	18.58	7	18.58	11	18.58	5	18.58	16	18.58	10
18.6	166.5	18.6	9	18.6	10	18.6	4	18.6	13	18.6	8	18.6	7	18.6	5	18.6	10	18.6	11
18.62	163.5	18.62	3	18.62	9	18.62	9	18.62	7	18.62	9	18.62	6	18.62	2	18.62	9	18.62	10
18.64	164.25	18.64	12	18.64	10	18.64	8	18.64	11	18.64	10	18.64	12	18.64	7	18.64	10	18.64	9
18.66	168	18.66	10	18.66	7	18.66	6	18.66	7	18.66	9	18.66	8	18.66	5	18.66	7	18.66	13
18.68	162.75	18.68	7	18.68	14	18.68	6	18.68	9	18.68	3	18.68	6	18.68	9	18.68	14	18.68	9
18.7	164.25	18.7	5	18.7	11	18.7	7	18.7	9	18.7	7	18.7	8	18.7	13	18.7	11	18.7	8
18.72	162	18.72	9	18.72	10	18.72	4	18.72	16	18.72	16	18.72	10	18.72	9	18.72	10	18.72	12
18.74	167.25	18.74	6	18.74	8	18.74	4	18.74	9	18.74	12	18.74	2	18.74	6	18.74	8	18.74	6
18.76	164.25	18.76	7	18.76	6	18.76	12	18.76	1	18.76	8	18.76	2	18.76	6	18.76	6	18.76	7
18.78	162.75	18.78	9	18.78	5	18.78	10	18.78	6	18.78	7	18.78	14	18.78	12	18.78	5	18.78	9
18.8	162.75	18.8	11	18.8	8	18.8	11	18.8	7	18.8	8	18.8	10	18.8	9	18.8	8	18.8	8
18.82	167.25	18.82	7	18.82	12	18.82	7	18.82	10	18.82	8	18.82	6	18.82	15	18.82	12	18.82	7
18.84	163.5	18.84	10	18.84	14	18.84	6	18.84	8	18.84	10	18.84	3	18.84	9	18.84	14	18.84	6
18.86	165	18.86	9	18.86	11	18.86	5	18.86	7	18.86	8	18.86	13	18.86	4	18.86	11	18.86	4
18.88	166.5	18.88	10	18.88	13	18.88	9	18.88	9	18.88	8	18.88	3	18.88	8	18.88	13	18.88	11
18.9	167.25	18.9	13	18.9	11	18.9	3	18.9	15	18.9	9	18.9	6	18.9	11	18.9	11	18.9	9
18.92	161.25	18.92	5	18.92	6	18.92	13	18.92	8	18.92	9	18.92	8	18.92	11	18.92	6	18.92	11
18.94	165	18.94	13	18.94	6	18.94	11	18.94	9	18.94	7	18.94	10	18.94	7	18.94	6	18.94	8
18.96	170.25	18.96	6	18.96	15	18.96	6	18.96	8	18.96	12	18.96	9	18.96	10	18.96	15	18.96	8
18.98	168	18.98	7	18.98	9	18.98	12	18.98	10	18.98	9	18.98	5	18.98	12	18.98	9	18.98	9
19	168	19	9	19	8	19	11	19	9	19	3	19	7	19	9	19	8	19	7
19.02	165	19.02	10	19.02	5	19.02	8	19.02	11	19.02	9	19.02	7	19.02	11	19.02	5	19.02	6
19.04	164.25	19.04	9	19.04	7	19.04	6	19.04	8	19.04	10	19.04	12	19.04	11	19.04	7	19.04	12
19.06	171.75	19.06	14	19.06	10	19.06	4	19.06	5	19.06	10	19.06	6	19.06	14	19.06	10	19.06	4
19.08	171.75	19.08	15	19.08	8	19.08	13	19.08	7	19.08	8	19.08	7	19.08	17	19.08	8	19.08	14
19.1	180	19.1	9	19.1	8	19.1	12	19.1	12	19.1	10	19.1	8	19.1	7	19.1	8	19.1	5
19.12	171	19.12	19	19.12	13	19.12	15	19.12	12	19.12	17	19.12	21	19.12	9	19.12	13	19.12	12
19.14	170.25	19.14	14	19.14	9	19.14	21	19.14	14	19.14	9	19.14	16	19.14	12	19.14	9	19.14	17
19.16	177	19.16	12	19.16	7	19.16	18	19.16	13	19.16	17	19.16	19	19.16	12	19.16	7	19.16	15
19.18	184.5	19.18	14	19.18	15	19.18	16	19.18	9	19.18	8	19.18	22	19.18	15	19.18	15	19.18	19
19.2	177	19.2	19	19.2	22	19.2	16	19.2	21	19.2	8	19.2	20	19.2	22	19.2	22	19.2	21
19.22	171.75	19.22	21	19.22	22	19.22	26	19.22	17	19.22	20	19.22	20	19.22	20	19.22	22	19.22	19
19.24	166.5	19.24	15	19.24	21	19.24	15	19.24	15	19.24	18	19.24	18	19.24	23	19.24	21	19.24	23
19.26	171.75	19.26	28	19.26	22	19.26	22	19.26	26	19.26	21	19.26	20	19.26	19	19.26	22	19.26	28
19.28	168	19.28	18	19.28	22	19.28	17	19.28	23	19.28	29	19.28	18	19.28	27	19.28	22	19.28	19
19.3	163.5	19.3	21	19.3	25	19.3	17	19.3	16	19.3	15	19.3	16	19.3	24	19.3	25	19.3	21
19.32	168	19.32	21	19.32	16	19.32	7	19.32	23	19.32	35	19.32	13	19.32	18	19.32	16	19.32	13
19.34	164.25	19.34	21	19.34	31	19.34	10	19.34	36	19.34	29	19.34	11	19.34	15	19.34	31	19.34	13
19.36	159.75	19.36	20	19.36	16	19.36	11	19.36	25	19.36	18	19.36	19	19.36	12	19.36	16	19.36	12
19.38	159	19.38	17	19.38	18	19.38	14	19.38	23	19.38	27	19.38	13	19.38	9	19.38	18	19.38	5
19.4	162	19.4	7	19.4	10	19.4	10	19.4	12	19.4	19	19.4	7	19.4	13	19.4	10	19.4	9
19.42	157.5	19.42	15	19.42	15	19.42	10	19.42	14	19.42	14	19.42	7	19.42	9	19.42	15	19.42	17
19.44	161.25	19.44	17	19.44	10	19.44	13	19.44	9	19.44	21	19.44	15	19.44	10	19.44	10	19.44	8
19.46	167.25	19.46	11	19.46	12	19.46	8	19.46	17	19.46	12	19.46	9	19.46	12	19.46	12	19.46	5
19.48	163.5	19.48	11	19.48	6	19.48	9	19.48	14	19.48	14	19.48	4	19.48	11	19.48	6	19.48	6
19.5	168.75	19.5	9	19.5	10	19.5	8	19.5	11	19.5	15	19.5	9	19.5	11	19.5	10	19.5	8
19.52	160.5	19.52	5	19.52	10	19.52	4	19.52	16	19.52	15	19.52	12	19.52	7	19.52	10	19.52	5
19.54	164.25	19.54	6	19.54	6	19.54	7	19.54	9	19.54	3	19.54	9	19.54	7	19.54	6	19.54	8
19.56	164.25	19.56	7	19.56	5	19.56	10	19.56	17	19.56	10	19.56	8	19.56	7	19.56	5	19.56	8
19.58	163.5	19.58	10	19.58	14	19.58	12	19.58	6	19.58	15	19.58	16	19.58	8	19.58	14	19.58	10
19.6	163.5	19.6	8	19.6	7	19.6	12	19.6	6	19.6	7	19.6	7	19.6	9	19.6	7	19.6	9
19.62	165	19.62	15	19.62	10	19.62	8	19.62	11	19.62	6	19.62	11	19.62	7	19.62	10	19.62	5
19.64	162	19.64	8	19.64	9	19.64	10	19.64	13	19.64	10	19.64	10	19.64	10	19.64	9	19.64	8
19.66	160.5	19.66	6	19.66	4	19.66	7	19.66	9	19.66	8	19.66	5	19.66	10	19.66	4	19.66	7
19.68	168	19.68	4	19.68	4	19.68	9	19.68	9	19.68	12	19.68	8	19.68	6	19.68	4	19.68	5
19.7	164.25	19.7	8	19.7	8	19.7	9	19.7	14	19.7	6	19.7	7	19.7	12	19.7	8	19.7	8
19.72	164.25	19.72	5	19.72	9	19.72	10	19.72	6	19.72	11	19.72	7	19.72	10	19.72	9	19.72	9
19.74	163.5	19.74	8	19.74	10	19.74	5	19.74	10	19.74	7	19.74	5	19.74	7	19.74	10	19.74	11
19.76	170.25	19.76	9	19.76	4	19.76	7	19.76	13	19.76	9	19.76	10	19.76	6	19.76	4	19.76	10
19.78	174	19.78	14	19.78	7	19.78	9	19.78	6	19.78	10	19.78	6	19.78	7	19.78	7	19.78	7
19.8	163.5	19.8	15	19.8	11	19.8	8	19.8	9	19.8	10	19.8	3	19.8	7	19.8	11	19.8	7
19.82	165	19.82	6	19.82	11	19.82	10	19.82	11	19.82	7	19.82	6	19.82	12	19.82	11	19.82	9
19.84	165.75	19.84	6	19.84	13	19.84	13	19.84	6	19.84	8	19.84	5	19.84	9	19.84	13	19.84	8
19.86	165.75	19.86	9	19.86	13	19.86	12	19.86	10	19.86	10	19.86	12	19.86	8	19.86	13	19.86	11
19.88	161.25	19.88	15	19.88	11	19.88	6	19.88	8	19.88	9	19.88	14	19.88	9	19.88	11	19.88	6
19.9	173.25	19.9	14	19.9	10	19.9	10	19.9	7	19.9	11	19.9	19	19.9	10	19.9	10	19.9	10
19.92	168	19.92	13	19.92	5	19.92	7	19.92	14	19.92	17	19.92	15	19.92	9	19.92	5	19.92	9
19.94	165.75	19.94	11	19.94	10	19.94	16	19.94	10	19.94	11	19.94	8	19.94	14	19.94	10	19.94	12
19.96	168.75	19.96	14	19.96	12	19.96	4	19.96	13	19.96	9	19.96	6	19.96	9	19.96	12	19.96	14
19.98	161.25	19.98	6	19.98	15	19.98	8	19.98	15	19.98	14	19.98	11	19.98	7	19.98	15	19.98	17
20	162.75	20	6	20	10	20	6	20	15	20	12	20	6	20	8	20	10	20	9
20.02	161.25	20.02	5	20.02	8	20.02	8	20.02	9	20.02	14	20.02	10	20.02	9	20.02	8	20.02	7
20.04	164.25	20.04	10	20.04	8	20.04	12	20.04	9	20.04	11	20.04	7	20.04	16	20.04	8	20.04	8
20.06	161.25	20.06	14	20.06	18	20.06	12	20.06	10	20.06	16	20.06	7	20.06	14	20.06	18	20.06	11
20.08	168	20.08	7	20.08	8	20.08	7	20.08	8	20.08	13	20.08	6	20.08	9	20.08	8	20.08	3
20.1	171	20.1	9	20.1	15	20.1	12	20.1	12	20.1	14	20.1	11	20.1	4	20.1	15	20.1	11
20.12	165.75	20.12	7	20.12	8	20.12	11	20.12	10	20.12	18	20.12	11	20.12	10	20.12	8	20.12	7
20.14	171	20.14	8	20.14	11	20.14	16	20.14	10	20.14	14	20.14	9	20.14	10	20.14	11	20.14	8
20.16	168.75	20.16	14	20.16	8	20.16	12	20.16	10	20.16	5	20.16	13	20.16	12	20.16	8	20.16	7
20.18	172.5	20.18	9	20.18	4	20.18	16	20.18	14	20.18	11	20.18	8	20.18	13	20.18	4	20.18	7
20.2	178.5	20.2	11	20.2	9	20.2	10	20.2	8	20.2	8	20.2	7	20.2	11	20.2	9	20.2	9
20.22	174	20.22	13	20.22	9	20.22	16	20.22	13	20.22	14	20.22	8	20.22	11	20.22	9	20.22	17
20.24	175.5	20.24	14	20.24	11	20.24	21	20.24	8	20.24	8	20.24	23	20.24	9	20.24	11	20.24	13
20.26	189.75	20.26	11	20.26	9	20.26	21	20.26	9	20.26	11	20.26	14	20.26	12	20.26	9	20.26	16
20.28	192	20.28	14	20.28	11	20.28	24	20.28	16	20.28	7	20.28	22	20.28	24	20.28	11	20.28	20
20.3	189	20.3	23	20.3	11	20.3	27	20.3	17	20.3	12	20.3	11	20.3	29	20.3	11	20.3	19
20.32	180.75	20.32	22	20.32	16	20.32	28	20.32	19	20.32	14	20.32	26	20.32	16	20.32	16	20.32	24
20.34	186.75	20.34	18	20.34	27	20.34	23	20.34	21	20.34	23	20.34	28	20.34	34	20.34	27	20.34	26
20.36	181.5	20.36	17	20.36	23	20.36	20	20.36	23	20.36	17	20.36	19	20.36	24	20.36	23	20.36	27
20.38	180.75	20.38	32	20.38	28	20.38	21	20.38	30	20.38	26	20.38	28	20.38	30	20.38	28	20.38	25
20.4	174.75	20.4	28	20.4	22	20.4	20	20.4	32	20.4	22	20.4	33	20.4	28	20.4	22	20.4	16
20.42	169.5	20.42	29	20.42	33	20.42	24	20.42	31	20.42	24	20.42	26	20.42	33	20.42	33	20.42	17
20.44	169.5	20.44	20	20.44	24	20.44	24	20.44	27	20.44	42	20.44	22	20.44	19	20.44	24	20.44	22
20.46	174	20.46	32	20.46	26	20.46	11	20.46	30	20.46	43	20.46	15	20.46	28	20.46	26	20.46	23
20.48	163.5	20.48	30	20.48	26	20.48	13	20.48	35	20.48	27	20.48	19	20.48	25	20.48	26	20.48	16
20.5	169.5	20.5	27	20.5	27	20.5	12	20.5	32	20.5	37	20.5	12	20.5	28	20.5	27	20.5	11
20.52	166.5	20.52	10	20.52	16	20.52	10	20.52	21	20.52	28	20.52	13	20.52	16	20.52	16	20.52	12
20.54	158.25	20.54	20	20.54	23	20.54	10	20.54	26	20.54	27	20.54	12	20.54	15	20.54	23	20.54	20
20.56	166.5	20.56	16	20.56	17	20.56	13	20.56	18	20.56	12	20.56	13	20.56	14	20.56	17	20.56	9
20.58	166.5	20.58	9	20.58	14	20.58	16	20.58	15	20.58	14	20.58	15	20.58	15	20.58	14	20.58	14
20.6	176.25	20.6	11	20.6	6	20.6	13	20.6	15	20.6	16	20.6	9	20.6	12	20.6	6	20.6	8
20.62	174	20.62	14	20.62	16	20.62	15	20.62	10	20.62	17	20.62	7	20.62	12	20.62	16	20.62	14
20.64	171.75	20.64	11	20.64	11	20.64	20	20.64	7	20.64	10	20.64	12	20.64	7	20.64	11	20.64	15
20.66	181.5	20.66	16	20.66	12	20.66	14	20.66	11	20.66	15	20.66	8	20.66	11	20.66	12	20.66	20
20.68	180	20.68	11	20.68	9	20.68	17	20.68	13	20.68	19	20.68	14	20.68	10	20.68	9	20.68	15
20.7	193.5	20.7	15	20.7	12	20.7	26	20.7	17	20.7	14	20.7	18	20.7	14	20.7	12	20.7	21
20.72	195	20.72	17	20.72	12	20.72	16	20.72	11	20.72	4	20.72	12	20.72	20	20.72	12	20.72	13
20.74	187.5	20.74	18	20.74	20	20.74	33	20.74	17	20.74	21	20.74	22	20.74	17	20.74	20	20.74	24
20.76	206.25	20.76	31	20.76	21	20.76	29	20.76	11	20.76	13	20.76	26	20.76	19	20.76	21	20.76	28
20.78	190.5	20.78	19	20.78	35	20.78	37	20.78	22	20.78	27	20.78	23	20.78	23	20.78	35	20.78	18
20.8	203.25	20.8	26	20.8	32	20.8	37	20.8	26	20.8	35	20.8	32	20.8	35	20.8	32	20.8	40
20.82	192	20.82	33	20.82	27	20.82	34	20.82	27	20.82	28	20.82	35	20.82	34	20.82	27	20.82	42
20.84	191.25	20.84	43	20.84	32	20.84	26	20.84	35	20.84	22	20.84	28	20.84	36	20.84	32	20.84	22
20.86	184.5	20.86	33	20.86	32	20.86	28	20.86	35	20.86	39	20.86	34	20.86	35	20.86	32	20.86	45
20.88	180.75	20.88	35	20.88	35	20.88	34	20.88	51	20.88	25	20.88	38	20.88	49	20.88	35	20.88	41
20.9	175.5	20.9	33	20.9	39	20.9	25	20.9	49	20.9	42	20.9	27	20.9	47	20.9	39	20.9	43
20.92	167.25	20.92	23	20.92	45	20.92	26	20.92	29	20.92	50	20.92	30	20.92	33	20.92	45	20.92	30
20.94	165.75	20.94	21	20.94	36	20.94	18	20.94	51	20.94	47	20.94	20	20.94	25	20.94	36	20.94	28
20.96	167.25	20.96	27	20.96	33	20.96	21	20.96	47	20.96	35	20.96	21	20.96	20	20.96	33	20.96	21
20.98	167.25	20.98	23	20.98	25	20.98	19	20.98	33	20.98	33	20.98	24	20.98	18	20.98	25	20.98	19
21	164.25	21	25	21	30	21	14	21	35	21	33	21	14	21	14	21	30	21	9
21.02	163.5	21.02	11	21.02	24	21.02	5	21.02	24	21.02	27	21.02	15	21.02	15	21.02	24	21.02	12
21.04	159	21.04	17	21.04	16	21.04	11	21.04	17	21.04	22	21.04	10	21.04	16	21.04	16	21.04	12
21.06	159.75	21.06	18	21.06	12	21.06	6	21.06	17	21.06	13	21.06	13	21.06	13	21.06	12	21.06	12
21.08	160.5	21.08	10	21.08	8	21.08	11	21.08	15	21.08	13	21.08	12	21.08	13	21.08	8	21.08	11
21.1	160.5	21.1	17	21.1	6	21.1	10	21.1	18	21.1	16	21.1	11	21.1	12	21.1	6	21.1	6
21.12	158.25	21.12	12	21.12	9	21.12	17	21.12	15	21.12	22	21.12	7	21.12	15	21.12	9	21.12	8
21.14	156	21.14	16	21.14	6	21.14	13	21.14	12	21.14	16	21.14	8	21.14	13	21.14	6	21.14	11
21.16	159.75	21.16	12	21.16	13	21.16	8	21.16	10	21.16	6	21.16	10	21.16	13	21.16	13	21.16	9
21.18	165	21.18	8	21.18	12	21.18	14	21.18	9	21.18	8	21.18	13	21.18	10	21.18	12	21.18	8
21.2	159	21.2	4	21.2	9	21.2	16	21.2	9	21.2	10	21.2	8	21.2	11	21.2	9	21.2	5
21.22	163.5	21.22	12	21.22	7	21.22	8	21.22	9	21.22	15	21.22	4	21.22	11	21.22	7	21.22	11
21.24	162.75	21.24	4	21.24	7	21.24	6	21.24	9	21.24	7	21.24	4	21.24	11	21.24	7	21.24	8
21.26	163.5	21.26	9	21.26	5	21.26	11	21.26	12	21.26	5	21.26	10	21.26	13	21.26	5	21.26	6
21.28	158.25	21.28	8	21.28	13	21.28	5	21.28	6	21.28	13	21.28	5	21.28	14	21.28	13	21.28	10
21.3	157.5	21.3	17	21.3	10	21.3	6	21.3	14	21.3	12	21.3	5	21.3	8	21.3	10	21.3	10
21.32	163.5	21.32	7	21.32	9	21.32	5	21.32	12	21.32	12	21.32	6	21.32	7	21.32	9	21.32	9
21.34	163.5	21.34	9	21.34	8	21.34	6	21.34	7	21.34	12	21.34	8	21.34	9	21.34	8	21.34	4
21.36	158.25	21.36	16	21.36	5	21.36	15	21.36	4	21.36	8	21.36	12	21.36	6	21.36	5	21.36	4
21.38	162	21.38	7	21.38	7	21.38	3	21.38	11	21.38	12	21.38	7	21.38	13	21.38	7	21.38	8
21.4	153.75	21.4	7	21.4	11	21.4	8	21.4	11	21.4	7	21.4	1	21.4	7	21.4	11	21.4	10
21.42	162.75	21.42	12	21.42	14	21.42	13	21.42	10	21.42	13	21.42	7	21.42	8	21.42	14	21.42	10
21.44	160.5	21.44	8	21.44	12	21.44	5	21.44	8	21.44	8	21.44	7	21.44	11	21.44	12	21.44	9
21.46	163.5	21.46	4	21.46	13	21.46	10	21.46	5	21.46	12	21.46	9	21.46	6	21.46	13	21.46	7
21.48	159.75	21.48	6	21.48	7	21.48	6	21.48	11	21.48	6	21.48	10	21.48	10	21.48	7	21.48	6
21.5	159.75	21.5	10	21.5	11	21.5	12	21.5	9	21.5	12	21.5	11	21.5	12	21.5	11	21.5	6
21.52	159.75	21.52	11	21.52	8	21.52	11	21.52	10	21.52	12	21.52	7	21.52	11	21.52	8	21.52	6
21.54	161.25	21.54	6	21.54	9	21.54	8	21.54	7	21.54	14	21.54	5	21.54	14	21.54	9	21.54	15
21.56	163.5	21.56	6	21.56	5	21.56	13	21.56	9	21.56	2	21.56	8	21.56	10	21.56	5	21.56	10
21.58	159	21.58	10	21.58	9	21.58	10	21.58	11	21.58	8	21.58	12	21.58	11	21.58	9	21.58	9
21.6	163.5	21.6	8	21.6	6	21.6	7	21.6	10	21.6	11	21.6	10	21.6	8	21.6	6	21.6	5
21.62	166.5	21.62	9	21.62	10	21.62	10	21.62	9	21.62	4	21.62	9	21.62	6	21.62	10	21.62	5
21.64	165	21.64	6	21.64	9	21.64	8	21.64	11	21.64	7	21.64	10	21.64	11	21.64	9	21.64	8
21.66	167.25	21.66	10	21.66	6	21.66	10	21.66	12	21.66	16	21.66	9	21.66	11	21.66	6	21.66	9
21.68	165.75	21.68	12	21.68	15	21.68	18	21.68	13	21.68	9	21.68	10	21.68	13	21.68	15	21.68	11
21.7	169.5	21.7	15	21.7	14	21.7	13	21.7	14	21.7	9	21.7	11	21.7	17	21.7	14	21.7	16
21.72	169.5	21.72	17	21.72	13	21.72	8	21.72	7	21.72	11	21.72	11	21.72	14	21.72	13	21.72	14
21.74	164.25	21.74	15	21.74	15	21.74	9	21.74	15	21.74	8	21.74	9	21.74	19	21.74	15	21.74	14
21.76	162.75	21.76	12	21.76	8	21.76	11	21.76	10	21.76	12	21.76	13	21.76	9	21.76	8	21.76	19
21.78	162	21.78	14	21.78	23	21.78	6	21.78	14	21.78	9	21.78	14	21.78	16	21.78	23	21.78	13
21.8	164.25	21.8	12	21.8	16	21.8	9	21.8	16	21.8	19	21.8	13	21.8	19	21.8	16	21.8	15
21.82	168.75	21.82	16	21.82	12	21.82	13	21.82	18	21.82	18	21.82	9	21.82	13	21.82	12	21.82	6
21.84	163.5	21.84	19	21.84	22	21.84	13	21.84	14	21.84	14	21.84	12	21.84	11	21.84	22	21.84	15
21.86	163.5	21.86	11	21.86	20	21.86	15	21.86	20	21.86	14	21.86	16	21.86	17	21.86	20	21.86	17
21.88	158.25	21.88	8	21.88	13	21.88	11	21.88	18	21.88	21	21.88	14	21.88	12	21.88	13	21.88	11
21.9	162.75	21.9	14	21.9	12	21.9	11	21.9	9	21.9	13	21.9	7	21.9	10	21.9	12	21.9	14
21.92	163.5	21.92	20	21.92	16	21.92	8	21.92	15	21.92	10	21.92	3	21.92	14	21.92	16	21.92	7
21.94	157.5	21.94	5	21.94	15	21.94	11	21.94	14	21.94	16	21.94	10	21.94	15	21.94	15	21.94	7
21.96	173.25	21.96	5	21.96	3	21.96	7	21.96	17	21.96	14	21.96	13	21.96	12	21.96	3	21.96	6
21.98	167.25	21.98	13	21.98	13	21.98	8	21.98	11	21.98	14	21.98	5	21.98	15	21.98	13	21.98	13
22	172.5	22	11	22	8	22	13	22	11	22	11	22	11	22	13	22	8	22	12
22.02	172.5	22.02	13	22.02	12	22.02	7	22.02	6	22.02	7	22.02	15	22.02	9	22.02	12	22.02	10
22.04	166.5	22.04	12	22.04	8	22.04	10	22.04	9	22.04	9	22.04	10	22.04	17	22.04	8	22.04	15
22.06	177	22.06	18	22.06	14	22.06	23	22.06	7	22.06	12	22.06	12	22.06	10	22.06	14	22.06	13
22.08	172.5	22.08	12	22.08	8	22.08	14	22.08	18	22.08	11	22.08	21	22.08	9	22.08	8	22.08	9
22.1	174.75	22.1	18	22.1	21	22.1	19	22.1	17	22.1	10	22.1	10	22.1	13	22.1	21	22.1	18
22.12	174	22.12	16	22.12	18	22.12	17	22.12	12	22.12	14	22.12	15	22.12	24	22.12	18	22.12	24
22.14	183	22.14	23	22.14	14	22.14	22	22.14	13	22.14	15	22.14	20	22.14	24	22.14	14	22.14	13
22.16	166.5	22.16	15	22.16	21	22.16	16	22.16	14	22.16	19	22.16	19	22.16	27	22.16	21	22.16	25
22.18	170.25	22.18	14	22.18	21	22.18	15	22.18	23	22.18	15	22.18	16	22.18	26	22.18	21	22.18	27
22.2	168	22.2	18	22.2	23	22.2	12	22.2	23	22.2	18	22.2	19	22.2	26	22.2	23	22.2	24
22.22	165.75	22.22	21	22.22	30	22.22	11	22.22	14	22.22	18	22.22	14	22.22	24	22.22	30	22.22	23
22.24	169.5	22.24	12	22.24	28	22.24	15	22.24	27	22.24	24	22.24	10	22.24	24	22.24	28	22.24	20
22.26	171.75	22.26	19	22.26	22	22.26	11	22.26	25	22.26	30	22.26	19	22.26	16	22.26	22	22.26	17
22.28	162	22.28	21	22.28	20	22.28	14	22.28	15	22.28	33	22.28	16	22.28	20	22.28	20	22.28	19
22.3	162.75	22.3	14	22.3	23	22.3	18	22.3	18	22.3	21	22.3	11	22.3	24	22.3	23	22.3	17
22.32	165	22.32	11	22.32	22	22.32	13	22.32	18	22.32	19	22.32	13	22.32	17	22.32	22	22.32	19
22.34	168	22.34	18	22.34	15	22.34	10	22.34	14	22.34	18	22.34	16	22.34	17	22.34	15	22.34	18
22.36	164.25	22.36	13	22.36	13	22.36	11	22.36	19	22.36	18	22.36	14	22.36	13	22.36	13	22.36	15
22.38	165.75	22.38	11	22.38	6	22.38	10	22.38	12	22.38	16	22.38	18	22.38	14	22.38	6	22.38	13
22.4	164.25	22.4	12	22.4	14	22.4	11	22.4	13	22.4	16	22.4	12	22.4	13	22.4	14	22.4	14
22.42	165	22.42	16	22.42	12	22.42	12	22.42	14	22.42	14	22.42	10	22.42	12	22.42	12	22.42	5
22.44	161.25	22.44	12	22.44	6	22.44	13	22.44	17	22.44	11	22.44	7	22.44	15	22.44	6	22.44	9
22.46	164.25	22.46	14	22.46	11	22.46	8	22.46	14	22.46	9	22.46	13	22.46	19	22.46	11	22.46	11
22.48	168.75	22.48	21	22.48	16	22.48	8	22.48	20	22.48	19	22.48	9	22.48	6	22.48	16	22.48	10
22.5	168	22.5	14	22.5	15	22.5	11	22.5	16	22.5	5	22.5	9	22.5	7	22.5	15	22.5	13
22.52	168.75	22.52	11	22.52	11	22.52	9	22.52	10	22.52	13	22.52	11	22.52	15	22.52	11	22.52	9
22.54	171.75	22.54	14	22.54	10	22.54	15	22.54	11	22.54	5	22.54	7	22.54	8	22.54	10	22.54	17
22.56	169.5	22.56	14	22.56	13	22.56	14	22.56	16	22.56	12	22.56	14	22.56	12	22.56	13	22.56	8
22.58	165.75	22.58	14	22.58	14	22.58	9	22.58	14	22.58	13	22.58	8	22.58	12	22.58	14	22.58	6
22.6	165.75	22.6	12	22.6	17	22.6	15	22.6	16	22.6	17	22.6	9	22.6	22	22.6	17	22.6	12
22.62	169.5	22.62	8	22.62	15	22.62	18	22.62	15	22.62	16	22.62	9	22.62	14	22.62	15	22.62	12
22.64	176.25	22.64	13	22.64	14	22.64	13	22.64	10	22.64	21	22.64	11	22.64	9	22.64	14	22.64	10
22.66	164.25	22.66	21	22.66	8	22.66	11	22.66	17	22.66	13	22.66	11	22.66	18	22.66	8	22.66	11
22.68	171.75	22.68	15	22.68	17	22.68	22	22.68	15	22.68	14	22.68	22	22.68	18	22.68	17	22.68	15
22.7	180	22.7	10	22.7	15	22.7	21	22.7	11	22.7	13	22.7	22	22.7	10	22.7	15	22.7	16
22.72	182.25	22.72	25	22.72	17	22.72	14	22.72	18	22.72	15	22.72	19	22.72	16	22.72	17	22.72	18
22.74	175.5	22.74	14	22.74	25	22.74	28	22.74	20	22.74	15	22.74	22	22.74	23	22.74	25	22.74	14
22.76	184.5	22.76	14	22.76	21	22.76	14	22.76	12	22.76	13	22.76	26	22.76	17	22.76	21	22.76	24
22.78	192.75	22.78	17	22.78	25	22.78	24	22.78	22	22.78	17	22.78	16	22.78	25	22.78	25	22.78	17
22.8	203.25	22.8	15	22.8	17	22.8	30	22.8	33	22.8	17	22.8	19	22.8	22	22.8	17	22.8	23
22.82	213.75	22.82	29	22.82	24	22.82	29	22.82	22	22.82	19	22.82	25	22.82	28	22.82	24	22.82	20
22.84	252.75	22.84	28	22.84	18	22.84	37	22.84	28	22.84	14	22.84	23	22.84	21	22.84	18	22.84	24
22.86	245.25	22.86	25	22.86	21	22.86	34	22.86	30	22.86	26	22.86	24	22.86	22	22.86	21	22.86	21
22.88	272.25	22.88	43	22.88	21	22.88	56	22.88	18	22.88	17	22.88	30	22.88	43	22.88	21	22.88	30
22.9	303.75	22.9	43	22.9	27	22.9	59	22.9	24	22.9	25	22.9	39	22.9	30	22.9	27	22.9	28
22.92	360.75	22.92	69	22.92	38	22.92	97	22.92	41	22.92	28	22.92	51	22.92	57	22.92	38	22.92	53
22.94	396	22.94	66	22.94	48	22.94	112	22.94	38	22.94	25	22.94	86	22.94	63	22.94	48	22.94	62
22.96	406.5	22.96	86	22.96	61	22.96	117	22.96	54	22.96	42	22.96	95	22.96	75	22.96	61	22.96	84
22.98	420	22.98	101	22.98	81	22.98	163	22.98	59	22.98	32	22.98	132	22.98	101	22.98	81	22.98	112
23	433.5	23	141	23	100	23	192	23	75	23	61	23	145	23	134	23	100	23	154
23.02	427.5	23.02	180	23.02	129	23.02	191	23.02	90	23.02	84	23.02	149	23.02	143	23.02	129	23.02	160
23.04	366	23.04	196	23.04	144	23.04	191	23.04	122	23.04	96	23.04	193	23.04	187	23.04	144	23.04	181
23.06	344.25	23.06	232	23.06	193	23.06	162	23.06	188	23.06	136	23.06	196	23.06	221	23.06	193	23.06	193
23.08	322.5	23.08	235	23.08	222	23.08	167	23.08	196	23.08	156	23.08	183	23.08	210	23.08	222	23.08	196
23.1	296.25	23.1	211	23.1	228	23.1	131	23.1	219	23.1	207	23.1	158	23.1	184	23.1	228	23.1	193
23.12	273.75	23.12	230	23.12	200	23.12	159	23.12	211	23.12	241	23.12	178	23.12	219	23.12	200	23.12	189
23.14	304.5	23.14	176	23.14	215	23.14	124	23.14	222	23.14	270	23.14	149	23.14	193	23.14	215	23.14	137
23.16	292.5	23.16	167	23.16	211	23.16	120	23.16	244	23.16	278	23.16	142	23.16	152	23.16	211	23.16	162
23.18	312	23.18	149	23.18	162	23.18	120	23.18	209	23.18	242	23.18	140	23.18	168	23.18	162	23.18	130
23.2	291	23.2	148	23.2	142	23.2	109	23.2	187	23.2	210	23.2	118	23.2	127	23.2	142	23.2	153
23.22	284.25	23.22	147	23.22	146	23.22	110	23.22	184	23.22	201	23.22	142	23.22	132	23.22	146	23.22	120
23.24	298.5	23.24	142	23.24	153	23.24	119	23.24	149	23.24	196	23.24	159	23.24	130	23.24	153	23.24	140
23.26	297	23.26	115	23.26	149	23.26	105	23.26	180	23.26	184	23.26	139	23.26	135	23.26	149	23.26	132
23.28	279	23.28	156	23.28	133	23.28	110	23.28	168	23.28	159	23.28	155	23.28	152	23.28	133	23.28	135
23.3	266.25	23.3	129	23.3	145	23.3	111	23.3	184	23.3	197	23.3	123	23.3	139	23.3	145	23.3	138
23.32	258	23.32	144	23.32	147	23.32	87	23.32	158	23.32	198	23.32	136	23.32	125	23.32	147	23.32	144
23.34	260.25	23.34	139	23.34	144	23.34	102	23.34	179	23.34	186	23.34	120	23.34	147	23.34	144	23.34	136
23.36	243	23.36	119	23.36	145	23.36	73	23.36	172	23.36	205	23.36	104	23.36	123	23.36	145	23.36	109
23.38	222	23.38	117	23.38	135	23.38	56	23.38	155	23.38	183	23.38	115	23.38	123	23.38	135	23.38	83
23.4	205.5	23.4	119	23.4	102	23.4	56	23.4	122	23.4	188	23.4	97	23.4	102	23.4	102	23.4	83
23.42	201.75	23.42	79	23.42	105	23.42	44	23.42	113	23.42	145	23.42	76	23.42	68	23.42	105	23.42	67
23.44	193.5	23.44	74	23.44	98	23.44	49	23.44	119	23.44	132	23.44	71	23.44	58	23.44	98	23.44	71
23.46	195	23.46	71	23.46	75	23.46	42	23.46	87	23.46	122	23.46	53	23.46	53	23.46	75	23.46	56
23.48	189.75	23.48	46	23.48	61	23.48	40	23.48	74	23.48	95	23.48	49	23.48	47	23.48	61	23.48	43
23.5	210.75	23.5	53	23.5	53	23.5	31	23.5	73	23.5	75	23.5	43	23.5	47	23.5	53	23.5	33
23.52	212.25	23.52	50	23.52	34	23.52	41	23.52	55	23.52	64	23.52	33	23.52	47	23.52	34	23.52	32
23.54	204.75	23.54	60	23.54	32	23.54	43	23.54	49	23.54	42	23.54	47	23.54	35	23.54	32	23.54	48
23.56	216.75	23.56	35	23.56	41	23.56	47	23.56	60	23.56	45	23.56	45	23.56	39	23.56	41	23.56	35
23.58	222	23.58	47	23.58	40	23.58	40	23.58	56	23.58	38	23.58	30	23.58	51	23.58	40	23.58	45
23.6	230.25	23.6	53	23.6	37	23.6	50	23.6	48	23.6	32	23.6	47	23.6	45	23.6	37	23.6	49
23.62	236.25	23.62	57	23.62	42	23.62	65	23.62	51	23.62	38	23.62	53	23.62	53	23.62	42	23.62	55
23.64	234.75	23.64	52	23.64	73	23.64	67	23.64	49	23.64	51	23.64	57	23.64	70	23.64	73	23.64	51
23.66	246.75	23.66	62	23.66	55	23.66	70	23.66	50	23.66	49	23.66	74	23.66	67	23.66	55	23.66	73
23.68	257.25	23.68	63	23.68	54	23.68	69	23.68	58	23.68	60	23.68	63	23.68	57	23.68	54	23.68	56
23.7	260.25	23.7	69	23.7	81	23.7	49	23.7	53	23.7	66	23.7	77	23.7	68	23.7	81	23.7	75
23.72	251.25	23.72	84	23.72	71	23.72	62	23.72	57	23.72	74	23.72	85	23.72	77	23.72	71	23.72	55
23.74	255.75	23.74	75	23.74	88	23.74	53	23.74	91	23.74	72	23.74	77	23.74	73	23.74	88	23.74	79
23.76	255.75	23.76	76	23.76	67	23.76	68	23.76	76	23.76	104	23.76	77	23.76	88	23.76	67	23.76	64
23.78	274.5	23.78	87	23.78	67	23.78	62	23.78	84	23.78	100	23.78	68	23.78	80	23.78	67	23.78	67
23.8	264.75	23.8	79	23.8	71	23.8	80	23.8	84	23.8	82	23.8	70	23.8	72	23.8	71	23.8	75
23.82	271.5	23.82	94	23.82	81	23.82	91	23.82	78	23.82	84	23.82	79	23.82	69	23.82	81	23.82	73
23.84	298.5	23.84	88	23.84	74	23.84	97	23.84	91	23.84	80	23.84	93	23.84	68	23.84	74	23.84	90
23.86	319.5	23.86	96	23.86	83	23.86	114	23.86	91	23.86	67	23.86	96	23.86	86	23.86	83	23.86	87
23.88	306	23.88	75	23.88	69	23.88	94	23.88	80	23.88	73	23.88	101	23.88	91	23.88	69	23.88	96
23.9	294.75	23.9	103	23.9	95	23.9	106	23.9	92	23.9	85	23.9	99	23.9	100	23.9	95	23.9	102
23.92	272.25	23.92	131	23.92	111	23.92	117	23.92	103	23.92	86	23.92	137	23.92	121	23.92	111	23.92	128
23.94	273	23.94	134	23.94	107	23.94	96	23.94	118	23.94	104	23.94	106	23.94	119	23.94	107	23.94	134
23.96	231	23.96	114	23.96	115	23.96	80	23.96	102	23.96	122	23.96	113	23.96	114	23.96	115	23.96	126
23.98	216.75	23.98	123	23.98	126	23.98	81	23.98	111	23.98	154	23.98	107	23.98	127	23.98	126	23.98	121
24	198.75	24	99	24	120	24	69	24	121	24	143	24	100	24	104	24	120	24	89
24.02	188.25	24.02	91	24.02	113	24.02	52	24.02	130	24.02	149	24.02	77	24.02	106	24.02	113	24.02	81
24.04	182.25	24.04	88	24.04	108	24.04	38	24.04	127	24.04	155	24.04	52	24.04	81	24.04	108	24.04	70
24.06	189	24.06	65	24.06	93	24.06	38	24.06	125	24.06	136	24.06	70	24.06	72	24.06	93	24.06	67
24.08	185.25	24.08	81	24.08	67	24.08	22	24.08	107	24.08	115	24.08	54	24.08	49	24.08	67	24.08	44
24.1	188.25	24.1	50	24.1	70	24.1	31	24.1	82	24.1	99	24.1	48	24.1	49	24.1	70	24.1	52
24.12	183.75	24.12	39	24.12	51	24.12	19	24.12	63	24.12	77	24.12	35	24.12	40	24.12	51	24.12	37
24.14	189.75	24.14	52	24.14	48	24.14	32	24.14	64	24.14	77	24.14	32	24.14	39	24.14	48	24.14	35
24.16	181.5	24.16	38	24.16	50	24.16	38	24.16	46	24.16	57	24.16	40	24.16	37	24.16	50	24.16	37
24.18	189	24.18	38	24.18	38	24.18	28	24.18	47	24.18	57	24.18	31	24.18	32	24.18	38	24.18	27
24.2	213.75	24.2	41	24.2	31	24.2	39	24.2	44	24.2	43	24.2	37	24.2	33	24.2	31	24.2	33
24.22	201.75	24.22	26	24.22	26	24.22	33	24.22	34	24.22	52	24.22	27	24.22	39	24.22	26	24.22	41
24.24	207.75	24.24	42	24.24	28	24.24	26	24.24	33	24.24	35	24.24	32	24.24	34	24.24	28	24.24	33
24.26	219	24.26	33	24.26	38	24.26	35	24.26	40	24.26	25	24.26	40	24.26	34	24.26	38	24.26	53
24.28	208.5	24.28	31	24.28	33	24.28	44	24.28	42	24.28	43	24.28	45	24.28	38	24.28	33	24.28	39
24.3	207	24.3	54	24.3	39	24.3	43	24.3	26	24.3	26	24.3	51	24.3	42	24.3	39	24.3	51
24.32	202.5	24.32	46	24.32	36	24.32	38	24.32	40	24.32	33	24.32	44	24.32	48	24.32	36	24.32	56
24.34	204	24.34	37	24.34	37	24.34	48	24.34	53	24.34	49	24.34	46	24.34	51	24.34	37	24.34	54
24.36	198	24.36	62	24.36	54	24.36	41	24.36	48	24.36	52	24.36	63	24.36	48	24.36	54	24.36	35
24.38	201.75	24.38	67	24.38	39	24.38	37	24.38	38	24.38	56	24.38	48	24.38	56	24.38	39	24.38	50
24.4	198.75	24.4	51	24.4	57	24.4	48	24.4	45	24.4	54	24.4	64	24.4	43	24.4	57	24.4	55
24.42	208.5	24.42	42	24.42	57	24.42	40	24.42	60	24.42	53	24.42	64	24.42	50	24.42	57	24.42	46
24.44	202.5	24.44	66	24.44	51	24.44	29	24.44	73	24.44	78	24.44	42	24.44	51	24.44	51	24.44	54
24.46	202.5	24.46	59	24.46	61	24.46	51	24.46	64	24.46	67	24.46	49	24.46	57	24.46	61	24.46	54
24.48	208.5	24.48	50	24.48	44	24.48	32	24.48	72	24.48	68	24.48	53	24.48	51	24.48	44	24.48	42
24.5	204.75	24.5	44	24.5	61	24.5	39	24.5	65	24.5	69	24.5	54	24.5	62	24.5	61	24.5	42
24.52	189.75	24.52	50	24.52	57	24.52	42	24.52	73	24.52	75	24.52	56	24.52	61	24.52	57	24.52	42
24.54	202.5	24.54	47	24.54	54	24.54	31	24.54	65	24.54	86	24.54	58	24.54	59	24.54	54	24.54	43
24.56	191.25	24.56	46	24.56	53	24.56	31	24.56	62	24.56	60	24.56	35	24.56	43	24.56	53	24.56	52
24.58	185.25	24.58	40	24.58	33	24.58	22	24.58	58	24.58	58	24.58	34	24.58	39	24.58	33	24.58	44
24.6	180	24.6	36	24.6	43	24.6	23	24.6	58	24.6	59	24.6	37	24.6	47	24.6	43	24.6	36
24.62	167.25	24.62	37	24.62	38	24.62	24	24.62	46	24.62	37	24.62	30	24.62	29	24.62	38	24.62	26
24.64	172.5	24.64	49	24.64	39	24.64	21	24.64	40	24.64	57	24.64	28	24.64	39	24.64	39	24.64	22
24.66	171	24.66	30	24.66	36	24.66	21	24.66	30	24.66	41	24.66	18	24.66	23	24.66	36	24.66	23
24.68	174.75	24.68	33	24.68	18	24.68	23	24.68	41	24.68	39	24.68	20	24.68	23	24.68	18	24.68	18
24.7	168.75	24.7	27	24.7	17	24.7	17	24.7	36	24.7	33	24.7	17	24.7	26	24.7	17	24.7	18
24.72	170.25	24.72	30	24.72	23	24.72	8	24.72	30	24.72	23	24.72	27	24.72	14	24.72	23	24.72	24
24.74	161.25	24.74	25	24.74	19	24.74	14	24.74	28	24.74	22	24.74	23	24.74	15	24.74	19	24.74	25
24.76	165.75	24.76	21	24.76	27	24.76	16	24.76	24	24.76	26	24.76	27	24.76	28	24.76	27	24.76	16
24.78	159.75	24.78	23	24.78	20	24.78	14	24.78	20	24.78	23	24.78	13	24.78	25	24.78	20	24.78	19
24.8	159.75	24.8	18	24.8	18	24.8	19	24.8	20	24.8	31	24.8	13	24.8	18	24.8	18	24.8	15
24.82	164.25	24.82	10	24.82	14	24.82	16	24.82	17	24.82	26	24.82	21	24.82	18	24.82	14	24.82	16
24.84	163.5	24.84	20	24.84	17	24.84	11	24.84	17	24.84	19	24.84	14	24.84	23	24.84	17	24.84	23
24.86	156.75	24.86	20	24.86	11	24.86	13	24.86	21	24.86	18	24.86	11	24.86	18	24.86	11	24.86	14
24.88	154.5	24.88	17	24.88	14	24.88	19	24.88	16	24.88	25	24.88	7	24.88	13	24.88	14	24.88	7
24.9	162.75	24.9	11	24.9	8	24.9	16	24.9	24	24.9	17	24.9	10	24.9	20	24.9	8	24.9	7
24.92	166.5	24.92	12	24.92	10	24.92	16	24.92	30	24.92	16	24.92	12	24.92	13	24.92	10	24.92	14
24.94	167.25	24.94	16	24.94	13	24.94	7	24.94	16	24.94	16	24.94	13	24.94	14	24.94	13	24.94	11
24.96	162	24.96	15	24.96	8	24.96	9	24.96	21	24.96	15	24.96	8	24.96	10	24.96	8	24.96	14
24.98	159	24.98	10	24.98	13	24.98	10	24.98	17	24.98	13	24.98	12	24.98	7	24.98	13	24.98	10
25	162	25	12	25	9	25	8	25	16	25	12	25	14	25	11	25	9	25	9
25.02	156	25.02	12	25.02	6	25.02	3	25.02	14	25.02	18	25.02	9	25.02	11	25.02	6	25.02	11
25.04	162	25.04	6	25.04	11	25.04	5	25.04	9	25.04	16	25.04	11	25.04	10	25.04	11	25.04	6
25.06	162	25.06	12	25.06	9	25.06	9	25.06	15	25.06	12	25.06	12	25.06	12	25.06	9	25.06	14
25.08	165.75	25.08	13	25.08	12	25.08	13	25.08	16	25.08	13	25.08	7	25.08	13	25.08	12	25.08	9
25.1	160.5	25.1	16	25.1	12	25.1	11	25.1	17	25.1	17	25.1	8	25.1	7	25.1	12	25.1	4
25.12	159.75	25.12	12	25.12	7	25.12	11	25.12	11	25.12	11	25.12	11	25.12	7	25.12	7	25.12	13
25.14	160.5	25.14	12	25.14	11	25.14	3	25.14	10	25.14	13	25.14	7	25.14	13	25.14	11	25.14	5
25.16	158.25	25.16	9	25.16	11	25.16	12	25.16	10	25.16	12	25.16	15	25.16	8	25.16	11	25.16	7
25.18	165	25.18	10	25.18	12	25.18	8	25.18	8	25.18	9	25.18	6	25.18	10	25.18	12	25.18	10
25.2	165.75	25.2	9	25.2	5	25.2	11	25.2	9	25.2	14	25.2	18	25.2	5	25.2	5	25.2	11
25.22	160.5	25.22	9	25.22	11	25.22	13	25.22	12	25.22	14	25.22	6	25.22	12	25.22	11	25.22	13
25.24	163.5	25.24	11	25.24	7	25.24	4	25.24	8	25.24	14	25.24	9	25.24	10	25.24	7	25.24	9
25.26	164.25	25.26	7	25.26	13	25.26	11	25.26	8	25.26	9	25.26	11	25.26	17	25.26	13	25.26	5
25.28	165	25.28	13	25.28	10	25.28	5	25.28	20	25.28	9	25.28	11	25.28	11	25.28	10	25.28	10
25.3	169.5	25.3	8	25.3	11	25.3	9	25.3	11	25.3	11	25.3	8	25.3	13	25.3	11	25.3	12
25.32	171	25.32	6	25.32	8	25.32	13	25.32	11	25.32	9	25.32	16	25.32	11	25.32	8	25.32	16
25.34	174	25.34	11	25.34	7	25.34	9	25.34	5	25.34	11	25.34	6	25.34	14	25.34	7	25.34	8
25.36	168.75	25.36	17	25.36	9	25.36	15	25.36	11	25.36	11	25.36	5	25.36	11	25.36	9	25.36	12
25.38	176.25	25.38	11	25.38	10	25.38	8	25.38	12	25.38	12	25.38	15	25.38	7	25.38	10	25.38	13
25.4	176.25	25.4	16	25.4	11	25.4	9	25.4	8	25.4	15	25.4	9	25.4	3	25.4	11	25.4	8
25.42	175.5	25.42	13	25.42	14	25.42	19	25.42	16	25.42	9	25.42	15	25.42	9	25.42	14	25.42	15
25.44	175.5	25.44	14	25.44	12	25.44	11	25.44	9	25.44	20	25.44	14	25.44	11	25.44	12	25.44	15
25.46	171	25.46	18	25.46	6	25.46	15	25.46	16	25.46	17	25.46	19	25.46	11	25.46	6	25.46	17
25.48	171.75	25.48	20	25.48	12	25.48	23	25.48	11	25.48	17	25.48	17	25.48	17	25.48	12	25.48	21
25.5	169.5	25.5	6	25.5	13	25.5	17	25.5	11	25.5	9	25.5	16	25.5	17	25.5	13	25.5	15
25.52	168.75	25.52	24	25.52	16	25.52	15	25.52	18	25.52	16	25.52	17	25.52	26	25.52	16	25.52	28
25.54	171.75	25.54	15	25.54	20	25.54	15	25.54	12	25.54	15	25.54	26	25.54	19	25.54	20	25.54	22
25.56	176.25	25.56	16	25.56	21	25.56	19	25.56	23	25.56	17	25.56	27	25.56	21	25.56	21	25.56	20
25.58	173.25	25.58	18	25.58	13	25.58	15	25.58	20	25.58	19	25.58	17	25.58	12	25.58	13	25.58	25
25.6	171	25.6	22	25.6	21	25.6	25	25.6	28	25.6	17	25.6	18	25.6	11	25.6	21	25.6	15
25.62	179.25	25.62	21	25.62	17	25.62	18	25.62	17	25.62	17	25.62	16	25.62	18	25.62	17	25.62	24
25.64	177.75	25.64	24	25.64	17	25.64	14	25.64	29	25.64	29	25.64	12	25.64	20	25.64	17	25.64	18
25.66	177.75	25.66	16	25.66	18	25.66	19	25.66	21	25.66	23	25.66	18	25.66	20	25.66	18	25.66	24
25.68	179.25	25.68	20	25.68	13	25.68	20	25.68	19	25.68	30	25.68	22	25.68	25	25.68	13	25.68	26
25.7	183.75	25.7	24	25.7	21	25.7	24	25.7	25	25.7	26	25.7	21	25.7	14	25.7	21	25.7	23
25.72	178.5	25.72	26	25.72	11	25.72	15	25.72	18	25.72	25	25.72	24	25.72	13	25.72	11	25.72	16
25.74	183.75	25.74	20	25.74	17	25.74	26	25.74	16	25.74	15	25.74	14	25.74	13	25.74	17	25.74	18
25.76	183.75	25.76	17	25.76	16	25.76	23	25.76	16	25.76	20	25.76	17	25.76	23	25.76	16	25.76	16
25.78	184.5	25.78	30	25.78	27	25.78	15	25.78	24	25.78	12	25.78	22	25.78	28	25.78	27	25.78	22
25.8	193.5	25.8	23	25.8	15	25.8	25	25.8	19	25.8	18	25.8	21	25.8	24	25.8	15	25.8	14
25.82	190.5	25.82	22	25.82	20	25.82	26	25.82	19	25.82	20	25.82	20	25.82	25	25.82	20	25.82	20
25.84	186.75	25.84	23	25.84	23	25.84	31	25.84	23	25.84	16	25.84	20	25.84	19	25.84	23	25.84	25
25.86	187.5	25.86	37	25.86	22	25.86	22	25.86	22	25.86	28	25.86	35	25.86	24	25.86	22	25.86	13
25.88	187.5	25.88	17	25.88	25	25.88	21	25.88	24	25.88	29	25.88	27	25.88	34	25.88	25	25.88	20
25.9	180.75	25.9	38	25.9	36	25.9	15	25.9	22	25.9	29	25.9	42	25.9	23	25.9	36	25.9	24
25.92	183.75	25.92	22	25.92	38	25.92	24	25.92	22	25.92	40	25.92	24	25.92	34	25.92	38	25.92	24
25.94	184.5	25.94	28	25.94	26	25.94	19	25.94	25	25.94	36	25.94	29	25.94	38	25.94	26	25.94	32
25.96	177.75	25.96	26	25.96	35	25.96	18	25.96	27	25.96	27	25.96	22	25.96	37	25.96	35	25.96	16
25.98	179.25	25.98	30	25.98	22	25.98	16	25.98	38	25.98	36	25.98	25	25.98	26	25.98	22	25.98	27
26	177.75	26	19	26	34	26	16	26	30	26	30	26	20	26	20	26	34	26	19
26.02	170.25	26.02	24	26.02	38	26.02	13	26.02	32	26.02	31	26.02	19	26.02	21	26.02	38	26.02	20
26.04	162	26.04	20	26.04	21	26.04	14	26.04	33	26.04	30	26.04	17	26.04	19	26.04	21	26.04	11
26.06	171.75	26.06	22	26.06	30	26.06	13	26.06	20	26.06	26	26.06	17	26.06	16	26.06	30	26.06	16
26.08	171.75	26.08	18	26.08	22	26.08	11	26.08	22	26.08	18	26.08	19	26.08	24	26.08	22	26.08	13
26.1	171	26.1	14	26.1	20	26.1	11	26.1	25	26.1	16	26.1	12	26.1	16	26.1	20	26.1	13
26.12	171	26.12	20	26.12	15	26.12	17	26.12	18	26.12	19	26.12	11	26.12	13	26.12	15	26.12	10
26.14	168	26.14	17	26.14	14	26.14	16	26.14	15	26.14	14	26.14	15	26.14	15	26.14	14	26.14	16
26.16	180	26.16	13	26.16	16	26.16	8	26.16	18	26.16	14	26.16	17	26.16	13	26.16	16	26.16	14
26.18	169.5	26.18	19	26.18	11	26.18	17	26.18	18	26.18	22	26.18	17	26.18	20	26.18	11	26.18	15
26.2	167.25	26.2	20	26.2	13	26.2	22	26.2	15	26.2	16	26.2	14	26.2	16	26.2	13	26.2	13
26.22	169.5	26.22	19	26.22	15	26.22	10	26.22	21	26.22	17	26.22	17	26.22	19	26.22	15	26.22	17
26.24	167.25	26.24	25	26.24	16	26.24	15	26.24	17	26.24	19	26.24	18	26.24	17	26.24	16	26.24	13
26.26	158.25	26.26	20	26.26	19	26.26	14	26.26	16	26.26	19	26.26	12	26.26	18	26.26	19	26.26	17
26.28	163.5	26.28	25	26.28	15	26.28	16	26.28	15	26.28	22	26.28	17	26.28	10	26.28	15	26.28	13
26.3	174.75	26.3	13	26.3	18	26.3	14	26.3	20	26.3	21	26.3	13	26.3	13	26.3	18	26.3	10
26.32	163.5	26.32	16	26.32	13	26.32	10	26.32	24	26.32	17	26.32	17	26.32	15	26.32	13	26.32	15
26.34	167.25	26.34	13	26.34	14	26.34	12	26.34	23	26.34	13	26.34	20	26.34	20	26.34	14	26.34	18
26.36	168	26.36	14	26.36	14	26.36	10	26.36	21	26.36	21	26.36	13	26.36	8	26.36	14	26.36	8
26.38	165.75	26.38	19	26.38	16	26.38	15	26.38	17	26.38	18	26.38	11	26.38	14	26.38	16	26.38	12
26.4	178.5	26.4	21	26.4	10	26.4	15	26.4	12	26.4	18	26.4	14	26.4	11	26.4	10	26.4	14
26.42	180	26.42	17	26.42	13	26.42	19	26.42	14	26.42	18	26.42	15	26.42	16	26.42	13	26.42	11
26.44	174.75	26.44	17	26.44	18	26.44	17	26.44	17	26.44	22	26.44	16	26.44	7	26.44	18	26.44	17
26.46	172.5	26.46	16	26.46	13	26.46	20	26.46	13	26.46	8	26.46	17	26.46	12	26.46	13	26.46	13
26.48	177	26.48	10	26.48	17	26.48	25	26.48	15	26.48	19	26.48	17	26.48	19	26.48	17	26.48	18
26.5	171.75	26.5	12	26.5	13	26.5	25	26.5	18	26.5	16	26.5	21	26.5	18	26.5	13	26.5	16
26.52	178.5	26.52	15	26.52	19	26.52	27	26.52	16	26.52	16	26.52	18	26.52	21	26.52	19	26.52	16
26.54	177.75	26.54	17	26.54	20	26.54	19	26.54	14	26.54	17	26.54	21	26.54	19	26.54	20	26.54	20
26.56	171.75	26.56	22	26.56	12	26.56	19	26.56	25	26.56	19	26.56	25	26.56	25	26.56	12	26.56	21
26.58	169.5	26.58	26	26.58	30	26.58	13	26.58	15	26.58	26	26.58	23	26.58	18	26.58	30	26.58	25
26.6	169.5	26.6	26	26.6	22	26.6	18	26.6	24	26.6	24	26.6	33	26.6	31	26.6	22	26.6	16
26.62	169.5	26.62	21	26.62	30	26.62	22	26.62	28	26.62	33	26.62	24	26.62	24	26.62	30	26.62	29
26.64	172.5	26.64	27	26.64	26	26.64	18	26.64	20	26.64	34	26.64	17	26.64	21	26.64	26	26.64	21
26.66	167.25	26.66	18	26.66	24	26.66	24	26.66	32	26.66	30	26.66	11	26.66	21	26.66	24	26.66	13
26.68	169.5	26.68	12	26.68	13	26.68	14	26.68	30	26.68	30	26.68	15	26.68	12	26.68	13	26.68	20
26.7	180	26.7	17	26.7	25	26.7	13	26.7	25	26.7	30	26.7	20	26.7	22	26.7	25	26.7	21
26.72	172.5	26.72	16	26.72	16	26.72	18	26.72	28	26.72	32	26.72	20	26.72	12	26.72	16	26.72	26
26.74	180	26.74	19	26.74	17	26.74	23	26.74	22	26.74	29	26.74	14	26.74	25	26.74	17	26.74	13
26.76	182.25	26.76	19	26.76	19	26.76	19	26.76	26	26.76	33	26.76	24	26.76	18	26.76	19	26.76	23
26.78	180	26.78	14	26.78	27	26.78	23	26.78	18	26.78	21	26.78	21	26.78	23	26.78	27	26.78	14
26.8	182.25	26.8	19	26.8	27	26.8	19	26.8	22	26.8	26	26.8	15	26.8	27	26.8	27	26.8	18
26.82	184.5	26.82	20	26.82	21	26.82	24	26.82	16	26.82	26	26.82	21	26.82	20	26.82	21	26.82	25
26.84	180.75	26.84	18	26.84	25	26.84	27	26.84	22	26.84	15	26.84	19	26.84	24	26.84	25	26.84	26
26.86	194.25	26.86	27	26.86	21	26.86	19	26.86	31	26.86	31	26.86	24	26.86	23	26.86	21	26.86	19
26.88	185.25	26.88	31	26.88	23	26.88	26	26.88	21	26.88	33	26.88	17	26.88	26	26.88	23	26.88	28
26.9	192	26.9	31	26.9	21	26.9	35	26.9	22	26.9	29	26.9	27	26.9	36	26.9	21	26.9	24
26.92	195.75	26.92	32	26.92	45	26.92	26	26.92	26	26.92	31	26.92	19	26.92	24	26.92	45	26.92	25
26.94	201.75	26.94	26	26.94	21	26.94	33	26.94	20	26.94	37	26.94	37	26.94	31	26.94	21	26.94	26
26.96	183.75	26.96	33	26.96	25	26.96	23	26.96	32	26.96	24	26.96	22	26.96	33	26.96	25	26.96	23
26.98	191.25	26.98	34	26.98	35	26.98	23	26.98	31	26.98	23	26.98	31	26.98	41	26.98	35	26.98	30
27	174.75	27	25	27	28	27	30	27	24	27	26	27	33	27	18	27	28	27	31
27.02	172.5	27.02	34	27.02	27	27.02	18	27.02	29	27.02	28	27.02	21	27.02	29	27.02	27	27.02	26
27.04	170.25	27.04	19	27.04	30	27.04	12	27.04	31	27.04	37	27.04	25	27.04	31	27.04	30	27.04	22
27.06	167.25	27.06	27	27.06	32	27.06	12	27.06	23	27.06	44	27.06	34	27.06	31	27.06	32	27.06	25
27.08	167.25	27.08	24	27.08	29	27.08	14	27.08	33	27.08	34	27.08	20	27.08	15	27.08	29	27.08	22
27.1	167.25	27.1	13	27.1	17	27.1	12	27.1	16	27.1	42	27.1	20	27.1	35	27.1	17	27.1	16
27.12	166.5	27.12	20	27.12	17	27.12	6	27.12	28	27.12	25	27.12	13	27.12	18	27.12	17	27.12	18
27.14	165	27.14	17	27.14	11	27.14	4	27.14	22	27.14	22	27.14	17	27.14	17	27.14	11	27.14	9
27.16	162	27.16	16	27.16	19	27.16	5	27.16	17	27.16	21	27.16	14	27.16	8	27.16	19	27.16	14
27.18	163.5	27.18	14	27.18	20	27.18	9	27.18	15	27.18	22	27.18	6	27.18	21	27.18	20	27.18	15
27.2	172.5	27.2	10	27.2	11	27.2	12	27.2	20	27.2	16	27.2	10	27.2	10	27.2	11	27.2	10
27.22	173.25	27.22	8	27.22	12	27.22	15	27.22	17	27.22	15	27.22	9	27.22	8	27.22	12	27.22	6
27.24	164.25	27.24	13	27.24	14	27.24	11	27.24	15	27.24	14	27.24	9	27.24	12	27.24	14	27.24	8
27.26	168	27.26	18	27.26	5	27.26	11	27.26	9	27.26	15	27.26	13	27.26	7	27.26	5	27.26	11
27.28	167.25	27.28	11	27.28	7	27.28	10	27.28	14	27.28	16	27.28	8	27.28	13	27.28	7	27.28	9
27.3	171	27.3	15	27.3	7	27.3	14	27.3	13	27.3	9	27.3	14	27.3	15	27.3	7	27.3	15
27.32	169.5	27.32	9	27.32	18	27.32	19	27.32	12	27.32	5	27.32	14	27.32	10	27.32	18	27.32	12
27.34	168.75	27.34	17	27.34	3	27.34	16	27.34	12	27.34	14	27.34	11	27.34	12	27.34	3	27.34	13
27.36	172.5	27.36	13	27.36	20	27.36	23	27.36	16	27.36	10	27.36	23	27.36	11	27.36	20	27.36	13
27.38	174	27.38	17	27.38	19	27.38	8	27.38	11	27.38	18	27.38	15	27.38	14	27.38	19	27.38	22
27.4	170.25	27.4	14	27.4	9	27.4	12	27.4	17	27.4	15	27.4	12	27.4	15	27.4	9	27.4	13
27.42	171.75	27.42	14	27.42	11	27.42	10	27.42	19	27.42	18	27.42	15	27.42	22	27.42	11	27.42	19
27.44	172.5	27.44	19	27.44	13	27.44	15	27.44	17	27.44	16	27.44	19	27.44	19	27.44	13	27.44	18
27.46	162	27.46	13	27.46	8	27.46	13	27.46	22	27.46	16	27.46	8	27.46	13	27.46	8	27.46	11
27.48	165	27.48	23	27.48	10	27.48	15	27.48	17	27.48	18	27.48	8	27.48	22	27.48	10	27.48	12
27.5	167.25	27.5	19	27.5	20	27.5	7	27.5	20	27.5	18	27.5	19	27.5	10	27.5	20	27.5	18
27.52	162.75	27.52	14	27.52	16	27.52	13	27.52	13	27.52	17	27.52	17	27.52	16	27.52	16	27.52	19
27.54	164.25	27.54	10	27.54	13	27.54	11	27.54	26	27.54	19	27.54	14	27.54	15	27.54	13	27.54	11
27.56	168	27.56	6	27.56	16	27.56	17	27.56	18	27.56	23	27.56	10	27.56	13	27.56	16	27.56	9
27.58	159	27.58	2	27.58	15	27.58	14	27.58	17	27.58	14	27.58	13	27.58	8	27.58	15	27.58	10
27.6	171	27.6	12	27.6	10	27.6	8	27.6	16	27.6	16	27.6	9	27.6	15	27.6	10	27.6	9
27.62	157.5	27.62	10	27.62	11	27.62	8	27.62	10	27.62	17	27.62	9	27.62	8	27.62	11	27.62	9
27.64	162	27.64	10	27.64	13	27.64	12	27.64	18	27.64	13	27.64	13	27.64	21	27.64	13	27.64	6
27.66	162	27.66	9	27.66	17	27.66	9	27.66	20	27.66	17	27.66	4	27.66	5	27.66	17	27.66	10
27.68	162	27.68	8	27.68	13	27.68	5	27.68	16	27.68	13	27.68	12	27.68	6	27.68	13	27.68	15
27.7	159.75	27.7	7	27.7	3	27.7	4	27.7	23	27.7	4	27.7	12	27.7	14	27.7	3	27.7	8
27.72	162	27.72	9	27.72	6	27.72	6	27.72	5	27.72	9	27.72	13	27.72	13	27.72	6	27.72	7
27.74	160.5	27.74	8	27.74	16	27.74	6	27.74	16	27.74	12	27.74	7	27.74	9	27.74	16	27.74	8
27.76	159	27.76	7	27.76	16	27.76	7	27.76	6	27.76	6	27.76	10	27.76	14	27.76	16	27.76	8
27.78	159	27.78	5	27.78	12	27.78	10	27.78	15	27.78	7	27.78	14	27.78	6	27.78	12	27.78	8
27.8	161.25	27.8	4	27.8	7	27.8	12	27.8	12	27.8	10	27.8	8	27.8	9	27.8	7	27.8	4
27.82	162	27.82	5	27.82	4	27.82	4	27.82	12	27.82	11	27.82	11	27.82	16	27.82	4	27.82	8
27.84	156.75	27.84	7	27.84	10	27.84	6	27.84	7	27.84	9	27.84	5	27.84	6	27.84	10	27.84	12
27.86	157.5	27.86	8	27.86	13	27.86	9	27.86	7	27.86	7	27.86	8	27.86	4	27.86	13	27.86	7
27.88	156.75	27.88	8	27.88	8	27.88	6	27.88	13	27.88	6	27.88	9	27.88	12	27.88	8	27.88	8
27.9	160.5	27.9	11	27.9	4	27.9	5	27.9	8	27.9	12	27.9	11	27.9	6	27.9	4	27.9	3
27.92	159	27.92	7	27.92	6	27.92	10	27.92	9	27.92	7	27.92	5	27.92	9	27.92	6	27.92	5
27.94	165.75	27.94	13	27.94	2	27.94	3	27.94	7	27.94	12	27.94	3	27.94	10	27.94	2	27.94	8
27.96	164.25	27.96	6	27.96	7	27.96	7	27.96	11	27.96	8	27.96	7	27.96	8	27.96	7	27.96	10
27.98	159	27.98	7	27.98	10	27.98	9	27.98	6	27.98	8	27.98	10	27.98	10	27.98	10	27.98	8
28	163.5	28	5	28	10	28	10	28	8	28	6	28	9	28	11	28	10	28	13
28.02	162	28.02	14	28.02	8	28.02	12	28.02	9	28.02	6	28.02	7	28.02	10	28.02	8	28.02	13
28.04	163.5	28.04	12	28.04	11	28.04	12	28.04	12	28.04	14	28.04	4	28.04	10	28.04	11	28.04	5
28.06	165	28.06	10	28.06	6	28.06	5	28.06	9	28.06	8	28.06	6	28.06	6	28.06	6	28.06	9
28.08	159	28.08	3	28.08	9	28.08	9	28.08	7	28.08	9	28.08	8	28.08	7	28.08	9	28.08	11
28.1	155.25	28.1	14	28.1	12	28.1	10	28.1	8	28.1	9	28.1	13	28.1	7	28.1	12	28.1	6
28.12	161.25	28.12	4	28.12	9	28.12	13	28.12	20	28.12	9	28.12	12	28.12	12	28.12	9	28.12	9
28.14	165	28.14	8	28.14	13	28.14	14	28.14	9	28.14	16	28.14	9	28.14	6	28.14	13	28.14	16
28.16	162	28.16	7	28.16	24	28.16	4	28.16	11	28.16	17	28.16	13	28.16	13	28.16	24	28.16	7
28.18	165	28.18	7	28.18	13	28.18	10	28.18	13	28.18	13	28.18	9	28.18	15	28.18	13	28.18	10
28.2	163.5	28.2	10	28.2	10	28.2	9	28.2	17	28.2	13	28.2	5	28.2	10	28.2	10	28.2	8
28.22	157.5	28.22	12	28.22	9	28.22	4	28.22	11	28.22	15	28.22	11	28.22	11	28.22	9	28.22	13
28.24	171	28.24	11	28.24	11	28.24	6	28.24	9	28.24	18	28.24	2	28.24	9	28.24	11	28.24	10
28.26	167.25	28.26	5	28.26	7	28.26	7	28.26	13	28.26	8	28.26	6	28.26	9	28.26	7	28.26	8
28.28	162	28.28	18	28.28	7	28.28	9	28.28	12	28.28	13	28.28	12	28.28	14	28.28	7	28.28	7
28.3	169.5	28.3	12	28.3	4	28.3	13	28.3	11	28.3	12	28.3	4	28.3	5	28.3	4	28.3	7
28.32	172.5	28.32	12	28.32	6	28.32	12	28.32	16	28.32	12	28.32	10	28.32	7	28.32	6	28.32	7
28.34	164.25	28.34	7	28.34	10	28.34	9	28.34	7	28.34	7	28.34	10	28.34	12	28.34	10	28.34	10
28.36	165.75	28.36	11	28.36	8	28.36	14	28.36	6	28.36	22	28.36	11	28.36	10	28.36	8	28.36	13
28.38	169.5	28.38	10	28.38	15	28.38	17	28.38	11	28.38	11	28.38	8	28.38	9	28.38	15	28.38	11
28.4	162.75	28.4	13	28.4	15	28.4	16	28.4	9	28.4	13	28.4	11	28.4	5	28.4	15	28.4	13
28.42	163.5	28.42	10	28.42	13	28.42	6	28.42	6	28.42	14	28.42	18	28.42	14	28.42	13	28.42	7
28.44	162.75	28.44	8	28.44	9	28.44	6	28.44	14	28.44	8	28.44	11	28.44	18	28.44	9	28.44	7
28.46	164.25	28.46	11	28.46	11	28.46	4	28.46	14	28.46	8	28.46	10	28.46	8	28.46	11	28.46	8
28.48	157.5	28.48	12	28.48	14	28.48	9	28.48	13	28.48	16	28.48	10	28.48	11	28.48	14	28.48	11
28.5	167.25	28.5	9	28.5	15	28.5	9	28.5	17	28.5	19	28.5	9	28.5	10	28.5	15	28.5	7
28.52	162	28.52	12	28.52	12	28.52	7	28.52	12	28.52	6	28.52	11	28.52	12	28.52	12	28.52	10
28.54	161.25	28.54	11	28.54	10	28.54	11	28.54	18	28.54	14	28.54	8	28.54	14	28.54	10	28.54	14
28.56	159	28.56	9	28.56	12	28.56	5	28.56	16	28.56	12	28.56	10	28.56	11	28.56	12	28.56	8
28.58	162	28.58	9	28.58	14	28.58	4	28.58	17	28.58	12	28.58	7	28.58	15	28.58	14	28.58	10
28.6	165	28.6	10	28.6	16	28.6	10	28.6	13	28.6	12	28.6	10	28.6	5	28.6	16	28.6	7
28.62	167.25	28.62	9	28.62	10	28.62	7	28.62	14	28.62	14	28.62	8	28.62	10	28.62	10	28.62	9
28.64	159.75	28.64	15	28.64	7	28.64	6	28.64	7	28.64	11	28.64	6	28.64	12	28.64	7	28.64	6
28.66	162	28.66	7	28.66	9	28.66	7	28.66	10	28.66	9	28.66	1	28.66	14	28.66	9	28.66	15
28.68	162.75	28.68	9	28.68	8	28.68	10	28.68	8	28.68	19	28.68	9	28.68	7	28.68	8	28.68	4
28.7	157.5	28.7	9	28.7	7	28.7	6	28.7	5	28.7	12	28.7	11	28.7	9	28.7	7	28.7	8
28.72	158.25	28.72	8	28.72	6	28.72	9	28.72	14	28.72	9	28.72	9	28.72	11	28.72	6	28.72	10
28.74	165	28.74	6	28.74	12	28.74	11	28.74	12	28.74	5	28.74	5	28.74	11	28.74	12	28.74	10
28.76	157.5	28.76	4	28.76	9	28.76	8	28.76	8	28.76	8	28.76	11	28.76	9	28.76	9	28.76	7
28.78	156	28.78	6	28.78	5	28.78	5	28.78	10	28.78	4	28.78	6	28.78	6	28.78	5	28.78	5
28.8	156.75	28.8	8	28.8	10	28.8	4	28.8	7	28.8	8	28.8	8	28.8	10	28.8	10	28.8	5
28.82	159	28.82	3	28.82	4	28.82	5	28.82	6	28.82	3	28.82	6	28.82	10	28.82	4	28.82	7
28.84	157.5	28.84	11	28.84	9	28.84	4	28.84	10	28.84	9	28.84	8	28.84	8	28.84	9	28.84	10
28.86	155.25	28.86	13	28.86	9	28.86	6	28.86	8	28.86	10	28.86	7	28.86	5	28.86	9	28.86	3
28.88	160.5	28.88	9	28.88	4	28.88	8	28.88	7	28.88	17	28.88	6	28.88	6	28.88	4	28.88	3
28.9	159.75	28.9	8	28.9	16	28.9	7	28.9	5	28.9	10	28.9	9	28.9	5	28.9	16	28.9	5
28.92	161.25	28.92	12	28.92	6	28.92	11	28.92	10	28.92	7	28.92	6	28.92	9	28.92	6	28.92	7
28.94	165	28.94	6	28.94	9	28.94	5	28.94	14	28.94	6	28.94	7	28.94	5	28.94	9	28.94	8
28.96	168	28.96	9	28.96	9	28.96	5	28.96	12	28.96	9	28.96	5	28.96	8	28.96	9	28.96	6
28.98	172.5	28.98	8	28.98	11	28.98	6	28.98	8	28.98	9	28.98	5	28.98	7	28.98	11	28.98	8
29	165	29	12	29	9	29	14	29	14	29	5	29	6	29	4	29	9	29	4
29.02	171	29.02	7	29.02	3	29.02	13	29.02	11	29.02	11	29.02	7	29.02	7	29.02	3	29.02	10
29.04	173.25	29.04	11	29.04	12	29.04	14	29.04	8	29.04	6	29.04	7	29.04	12	29.04	12	29.04	9
29.06	171	29.06	10	29.06	5	29.06	18	29.06	9	29.06	7	29.06	12	29.06	11	29.06	5	29.06	4
29.08	179.25	29.08	13	29.08	5	29.08	7	29.08	3	29.08	7	29.08	10	29.08	11	29.08	5	29.08	8
29.1	177.75	29.1	10	29.1	13	29.1	20	29.1	8	29.1	6	29.1	12	29.1	10	29.1	13	29.1	10
29.12	179.25	29.12	6	29.12	6	29.12	15	29.12	11	29.12	13	29.12	16	29.12	13	29.12	6	29.12	14
29.14	177	29.14	13	29.14	15	29.14	18	29.14	9	29.14	13	29.14	13	29.14	12	29.14	15	29.14	16
29.16	169.5	29.16	15	29.16	8	29.16	10	29.16	10	29.16	12	29.16	19	29.16	14	29.16	8	29.16	17
29.18	176.25	29.18	21	29.18	16	29.18	10	29.18	12	29.18	12	29.18	24	29.18	16	29.18	16	29.18	24
29.2	174.75	29.2	22	29.2	14	29.2	20	29.2	15	29.2	11	29.2	20	29.2	27	29.2	14	29.2	20
29.22	174	29.22	21	29.22	16	29.22	27	29.22	20	29.22	11	29.22	13	29.22	31	29.22	16	29.22	14
29.24	172.5	29.24	27	29.24	23	29.24	13	29.24	19	29.24	24	29.24	23	29.24	26	29.24	23	29.24	24
29.26	179.25	29.26	24	29.26	27	29.26	22	29.26	24	29.26	17	29.26	25	29.26	24	29.26	27	29.26	32
29.28	182.25	29.28	28	29.28	21	29.28	25	29.28	22	29.28	28	29.28	24	29.28	27	29.28	21	29.28	18
29.3	179.25	29.3	15	29.3	15	29.3	17	29.3	27	29.3	29	29.3	28	29.3	26	29.3	15	29.3	24
29.32	172.5	29.32	19	29.32	29	29.32	23	29.32	27	29.32	35	29.32	18	29.32	19	29.32	29	29.32	34
29.34	168	29.34	29	29.34	23	29.34	23	29.34	32	29.34	19	29.34	25	29.34	29	29.34	23	29.34	18
29.36	178.5	29.36	20	29.36	27	29.36	14	29.36	23	29.36	29	29.36	23	29.36	28	29.36	27	29.36	19
29.38	177.75	29.38	28	29.38	21	29.38	17	29.38	29	29.38	26	29.38	21	29.38	20	29.38	21	29.38	20
29.4	169.5	29.4	16	29.4	28	29.4	18	29.4	25	29.4	29	29.4	16	29.4	20	29.4	28	29.4	21
29.42	168.75	29.42	22	29.42	11	29.42	15	29.42	26	29.42	26	29.42	20	29.42	22	29.42	11	29.42	27
29.44	168	29.44	19	29.44	27	29.44	12	29.44	35	29.44	24	29.44	36	29.44	15	29.44	27	29.44	21
29.46	165.75	29.46	17	29.46	31	29.46	7	29.46	24	29.46	24	29.46	16	29.46	15	29.46	31	29.46	17
29.48	163.5	29.48	18	29.48	15	29.48	7	29.48	17	29.48	24	29.48	16	29.48	13	29.48	15	29.48	20
29.5	165.75	29.5	11	29.5	20	29.5	11	29.5	16	29.5	21	29.5	12	29.5	12	29.5	20	29.5	15
29.52	165	29.52	13	29.52	18	29.52	10	29.52	11	29.52	19	29.52	10	29.52	16	29.52	18	29.52	11
29.54	160.5	29.54	19	29.54	10	29.54	11	29.54	11	29.54	14	29.54	18	29.54	10	29.54	10	29.54	10
29.56	165.75	29.56	14	29.56	13	29.56	7	29.56	11	29.56	11	29.56	9	29.56	11	29.56	13	29.56	11
29.58	162	29.58	10	29.58	12	29.58	9	29.58	17	29.58	12	29.58	11	29.58	9	29.58	12	29.58	8
29.6	164.25	29.6	12	29.6	2	29.6	8	29.6	13	29.6	13	29.6	6	29.6	9	29.6	2	29.6	8
29.62	168	29.62	10	29.62	8	29.62	14	29.62	10	29.62	8	29.62	11	29.62	10	29.62	8	29.62	6
29.64	168.75	29.64	12	29.64	11	29.64	7	29.64	11	29.64	13	29.64	6	29.64	10	29.64	11	29.64	11
29.66	174.75	29.66	12	29.66	8	29.66	15	29.66	10	29.66	12	29.66	5	29.66	10	29.66	8	29.66	10
29.68	174.75	29.68	9	29.68	15	29.68	15	29.68	15	29.68	13	29.68	16	29.68	16	29.68	15	29.68	11
29.7	186.75	29.7	9	29.7	5	29.7	13	29.7	9	29.7	9	29.7	12	29.7	13	29.7	5	29.7	8
29.72	187.5	29.72	9	29.72	10	29.72	20	29.72	8	29.72	11	29.72	9	29.72	9	29.72	10	29.72	8
29.74	188.25	29.74	8	29.74	14	29.74	20	29.74	17	29.74	8	29.74	14	29.74	23	29.74	14	29.74	15
29.76	199.5	29.76	13	29.76	18	29.76	20	29.76	15	29.76	10	29.76	16	29.76	11	29.76	18	29.76	20
29.78	201.75	29.78	27	29.78	16	29.78	25	29.78	16	29.78	17	29.78	14	29.78	16	29.78	16	29.78	28
29.8	220.5	29.8	18	29.8	13	29.8	31	29.8	17	29.8	10	29.8	13	29.8	18	29.8	13	29.8	16
29.82	210	29.82	35	29.82	18	29.82	28	29.82	22	29.82	17	29.82	24	29.82	17	29.82	18	29.82	18
29.84	201	29.84	40	29.84	26	29.84	40	29.84	22	29.84	15	29.84	30	29.84	32	29.84	26	29.84	34
29.86	210.75	29.86	34	29.86	30	29.86	28	29.86	23	29.86	14	29.86	47	29.86	36	29.86	30	29.86	28
29.88	198.75	29.88	47	29.88	31	29.88	47	29.88	28	29.88	17	29.88	32	29.88	33	29.88	31	29.88	49
29.9	192	29.9	33	29.9	37	29.9	28	29.9	38	29.9	33	29.9	37	29.9	36	29.9	37	29.9	36
29.92	193.5	29.92	42	29.92	42	29.92	33	29.92	32	29.92	36	29.92	42	29.92	42	29.92	42	29.92	37
29.94	183.75	29.94	47	29.94	45	29.94	35	29.94	41	29.94	44	29.94	40	29.94	39	29.94	45	29.94	39
29.96	176.25	29.96	42	29.96	41	29.96	18	29.96	31	29.96	40	29.96	29	29.96	38	29.96	41	29.96	35
29.98	171	29.98	45	29.98	42	29.98	21	29.98	36	29.98	35	29.98	31	29.98	35	29.98	42	29.98	29
30	175.5	30	41	30	33	30	19	30	27	30	48	30	37	30	34	30	33	30	36
30.02	180	30.02	37	30.02	36	30.02	23	30.02	37	30.02	45	30.02	33	30.02	45	30.02	36	30.02	27
30.04	178.5	30.04	34	30.04	29	30.04	25	30.04	40	30.04	49	30.04	29	30.04	36	30.04	29	30.04	22
30.06	183.75	30.06	25	30.06	42	30.06	19	30.06	36	30.06	37	30.06	37	30.06	25	30.06	42	30.06	17
30.08	180	30.08	24	30.08	28	30.08	20	30.08	35	30.08	45	30.08	21	30.08	21	30.08	28	30.08	18
30.1	178.5	30.1	23	30.1	37	30.1	15	30.1	36	30.1	43	30.1	23	30.1	24	30.1	37	30.1	24
30.12	187.5	30.12	27	30.12	19	30.12	15	30.12	30	30.12	36	30.12	23	30.12	26	30.12	19	30.12	22
30.14	183	30.14	12	30.14	28	30.14	19	30.14	36	30.14	35	30.14	18	30.14	31	30.14	28	30.14	37
30.16	185.25	30.16	23	30.16	25	30.16	16	30.16	30	30.16	31	30.16	17	30.16	27	30.16	25	30.16	27
30.18	186	30.18	25	30.18	30	30.18	26	30.18	35	30.18	31	30.18	26	30.18	27	30.18	30	30.18	35
30.2	185.25	30.2	25	30.2	22	30.2	22	30.2	29	30.2	39	30.2	22	30.2	33	30.2	22	30.2	26
30.22	178.5	30.22	32	30.22	31	30.22	25	30.22	23	30.22	45	30.22	25	30.22	33	30.22	31	30.22	34
30.24	180.75	30.24	29	30.24	34	30.24	23	30.24	33	30.24	35	30.24	22	30.24	29	30.24	34	30.24	19
30.26	176.25	30.26	38	30.26	18	30.26	24	30.26	26	30.26	24	30.26	30	30.26	20	30.26	18	30.26	24
30.28	170.25	30.28	25	30.28	21	30.28	24	30.28	33	30.28	22	30.28	32	30.28	23	30.28	21	30.28	30
30.3	163.5	30.3	19	30.3	26	30.3	23	30.3	23	30.3	30	30.3	24	30.3	24	30.3	26	30.3	22
30.32	160.5	30.32	19	30.32	17	30.32	11	30.32	29	30.32	27	30.32	29	30.32	16	30.32	17	30.32	23
30.34	163.5	30.34	20	30.34	18	30.34	13	30.34	28	30.34	30	30.34	23	30.34	29	30.34	18	30.34	19
30.36	164.25	30.36	22	30.36	24	30.36	13	30.36	23	30.36	31	30.36	18	30.36	25	30.36	24	30.36	12
30.38	162.75	30.38	16	30.38	15	30.38	11	30.38	20	30.38	29	30.38	17	30.38	27	30.38	15	30.38	15
30.4	163.5	30.4	17	30.4	24	30.4	11	30.4	22	30.4	24	30.4	16	30.4	17	30.4	24	30.4	14
30.42	160.5	30.42	22	30.42	18	30.42	8	30.42	22	30.42	36	30.42	17	30.42	16	30.42	18	30.42	13
30.44	165.75	30.44	11	30.44	19	30.44	11	30.44	17	30.44	20	30.44	7	30.44	13	30.44	19	30.44	11
30.46	166.5	30.46	14	30.46	13	30.46	10	30.46	22	30.46	28	30.46	12	30.46	18	30.46	13	30.46	12
30.48	167.25	30.48	12	30.48	13	30.48	10	30.48	13	30.48	22	30.48	10	30.48	12	30.48	13	30.48	9
30.5	162	30.5	12	30.5	13	30.5	8	30.5	19	30.5	19	30.5	14	30.5	13	30.5	13	30.5	10
30.52	162	30.52	16	30.52	6	30.52	19	30.52	19	30.52	18	30.52	15	30.52	10	30.52	6	30.52	8
30.54	158.25	30.54	20	30.54	11	30.54	9	30.54	19	30.54	17	30.54	14	30.54	10	30.54	11	30.54	10
30.56	161.25	30.56	8	30.56	9	30.56	9	30.56	24	30.56	20	30.56	9	30.56	14	30.56	9	30.56	12
30.58	168	30.58	10	30.58	11	30.58	8	30.58	17	30.58	26	30.58	16	30.58	15	30.58	11	30.58	11
30.6	161.25	30.6	9	30.6	14	30.6	11	30.6	12	30.6	17	30.6	9	30.6	7	30.6	14	30.6	16
30.62	157.5	30.62	8	30.62	9	30.62	4	30.62	12	30.62	13	30.62	8	30.62	10	30.62	9	30.62	12
30.64	162.75	30.64	11	30.64	8	30.64	8	30.64	11	30.64	19	30.64	16	30.64	8	30.64	8	30.64	12
30.66	158.25	30.66	7	30.66	13	30.66	7	30.66	16	30.66	16	30.66	7	30.66	8	30.66	13	30.66	11
30.68	156.75	30.68	9	30.68	8	30.68	4	30.68	13	30.68	8	30.68	8	30.68	11	30.68	8	30.68	5
30.7	159.75	30.7	10	30.7	9	30.7	6	30.7	7	30.7	13	30.7	6	30.7	9	30.7	9	30.7	11
30.72	156.75	30.72	7	30.72	7	30.72	4	30.72	15	30.72	11	30.72	6	30.72	7	30.72	7	30.72	3
30.74	156.75	30.74	7	30.74	11	30.74	10	30.74	11	30.74	9	30.74	8	30.74	11	30.74	11	30.74	6
30.76	162.75	30.76	2	30.76	6	30.76	3	30.76	8	30.76	5	30.76	8	30.76	9	30.76	6	30.76	5
30.78	158.25	30.78	4	30.78	9	30.78	6	30.78	5	30.78	8	30.78	8	30.78	6	30.78	9	30.78	3
30.8	156	30.8	5	30.8	6	30.8	4	30.8	4	30.8	9	30.8	4	30.8	9	30.8	6	30.8	6
30.82	158.25	30.82	6	30.82	6	30.82	10	30.82	8	30.82	12	30.82	6	30.82	10	30.82	6	30.82	8
30.84	158.25	30.84	9	30.84	9	30.84	8	30.84	6	30.84	9	30.84	7	30.84	7	30.84	9	30.84	5
30.86	158.25	30.86	11	30.86	7	30.86	3	30.86	7	30.86	7	30.86	5	30.86	8	30.86	7	30.86	8
30.88	159.75	30.88	3	30.88	9	30.88	9	30.88	8	30.88	10	30.88	6	30.88	13	30.88	9	30.88	7
30.9	157.5	30.9	12	30.9	3	30.9	4	30.9	8	30.9	11	30.9	9	30.9	7	30.9	3	30.9	2
30.92	158.25	30.92	9	30.92	7	30.92	7	30.92	8	30.92	12	30.92	5	30.92	5	30.92	7	30.92	12
30.94	157.5	30.94	10	30.94	7	30.94	4	30.94	10	30.94	11	30.94	3	30.94	6	30.94	7	30.94	7
30.96	162.75	30.96	0	30.96	11	30.96	2	30.96	5	30.96	7	30.96	9	30.96	3	30.96	11	30.96	9
30.98	161.25	30.98	12	30.98	5	30.98	8	30.98	7	30.98	9	30.98	10	30.98	5	30.98	5	30.98	4
31	163.5	31	6	31	5	31	8	31	8	31	7	31	10	31	3	31	5	31	7
31.02	161.25	31.02	3	31.02	6	31.02	6	31.02	5	31.02	10	31.02	10	31.02	7	31.02	6	31.02	3
31.04	164.25	31.04	5	31.04	5	31.04	6	31.04	9	31.04	6	31.04	11	31.04	6	31.04	5	31.04	5
31.06	164.25	31.06	8	31.06	9	31.06	4	31.06	5	31.06	10	31.06	4	31.06	5	31.06	9	31.06	8
31.08	159	31.08	10	31.08	3	31.08	8	31.08	11	31.08	9	31.08	13	31.08	5	31.08	3	31.08	8
31.1	170.25	31.1	10	31.1	9	31.1	7	31.1	4	31.1	11	31.1	6	31.1	16	31.1	9	31.1	8
31.12	167.25	31.12	9	31.12	14	31.12	6	31.12	7	31.12	6	31.12	6	31.12	18	31.12	14	31.12	9
31.14	168	31.14	8	31.14	7	31.14	12	31.14	6	31.14	9	31.14	8	31.14	6	31.14	7	31.14	10
31.16	168.75	31.16	13	31.16	9	31.16	10	31.16	5	31.16	12	31.16	9	31.16	7	31.16	9	31.16	12
31.18	159.75	31.18	8	31.18	10	31.18	9	31.18	4	31.18	7	31.18	14	31.18	7	31.18	10	31.18	13
31.2	165.75	31.2	12	31.2	10	31.2	7	31.2	17	31.2	12	31.2	13	31.2	12	31.2	10	31.2	14
31.22	161.25	31.22	13	31.22	13	31.22	10	31.22	8	31.22	5	31.22	10	31.22	19	31.22	13	31.22	9
31.24	162.75	31.24	12	31.24	10	31.24	10	31.24	11	31.24	12	31.24	8	31.24	12	31.24	10	31.24	12
31.26	164.25	31.26	10	31.26	10	31.26	13	31.26	8	31.26	9	31.26	13	31.26	13	31.26	10	31.26	10
31.28	161.25	31.28	12	31.28	11	31.28	8	31.28	11	31.28	14	31.28	5	31.28	17	31.28	11	31.28	15
31.3	162.75	31.3	14	31.3	10	31.3	15	31.3	11	31.3	10	31.3	13	31.3	4	31.3	10	31.3	12
31.32	162.75	31.32	11	31.32	9	31.32	8	31.32	17	31.32	16	31.32	11	31.32	13	31.32	9	31.32	11
31.34	169.5	31.34	7	31.34	14	31.34	6	31.34	10	31.34	22	31.34	11	31.34	8	31.34	14	31.34	6
31.36	161.25	31.36	9	31.36	9	31.36	20	31.36	14	31.36	16	31.36	16	31.36	11	31.36	9	31.36	4
31.38	165	31.38	13	31.38	12	31.38	7	31.38	12	31.38	11	31.38	9	31.38	11	31.38	12	31.38	8
31.4	165	31.4	7	31.4	9	31.4	4	31.4	7	31.4	14	31.4	9	31.4	13	31.4	9	31.4	12
31.42	165	31.42	15	31.42	8	31.42	10	31.42	11	31.42	16	31.42	6	31.42	9	31.42	8	31.42	3
31.44	165	31.44	9	31.44	4	31.44	6	31.44	14	31.44	11	31.44	6	31.44	10	31.44	4	31.44	11
31.46	163.5	31.46	11	31.46	10	31.46	15	31.46	5	31.46	7	31.46	7	31.46	10	31.46	10	31.46	13
31.48	156.75	31.48	11	31.48	7	31.48	5	31.48	10	31.48	6	31.48	11	31.48	8	31.48	7	31.48	3
31.5	163.5	31.5	9	31.5	12	31.5	10	31.5	9	31.5	8	31.5	7	31.5	10	31.5	12	31.5	7
31.52	158.25	31.52	14	31.52	9	31.52	8	31.52	8	31.52	9	31.52	5	31.52	11	31.52	9	31.52	6
31.54	154.5	31.54	8	31.54	12	31.54	9	31.54	7	31.54	9	31.54	6	31.54	6	31.54	12	31.54	7
31.56	157.5	31.56	8	31.56	10	31.56	11	31.56	10	31.56	8	31.56	5	31.56	7	31.56	10	31.56	8
31.58	162.75	31.58	8	31.58	5	31.58	11	31.58	8	31.58	5	31.58	8	31.58	9	31.58	5	31.58	8
31.6	159.75	31.6	9	31.6	7	31.6	7	31.6	4	31.6	10	31.6	5	31.6	8	31.6	7	31.6	10
31.62	159.75	31.62	7	31.62	8	31.62	6	31.62	9	31.62	5	31.62	12	31.62	8	31.62	8	31.62	8
31.64	159.75	31.64	5	31.64	6	31.64	5	31.64	4	31.64	4	31.64	8	31.64	7	31.64	6	31.64	8
31.66	161.25	31.66	8	31.66	6	31.66	4	31.66	7	31.66	9	31.66	4	31.66	14	31.66	6	31.66	9
31.68	159	31.68	7	31.68	8	31.68	7	31.68	10	31.68	4	31.68	8	31.68	10	31.68	8	31.68	4
31.7	165	31.7	11	31.7	4	31.7	10	31.7	10	31.7	9	31.7	10	31.7	8	31.7	4	31.7	6
31.72	156	31.72	9	31.72	4	31.72	6	31.72	7	31.72	8	31.72	11	31.72	7	31.72	4	31.72	6
31.74	159.75	31.74	2	31.74	8	31.74	7	31.74	10	31.74	14	31.74	11	31.74	14	31.74	8	31.74	3
31.76	159	31.76	5	31.76	9	31.76	9	31.76	15	31.76	4	31.76	9	31.76	6	31.76	9	31.76	14
31.78	161.25	31.78	3	31.78	12	31.78	9	31.78	13	31.78	10	31.78	5	31.78	11	31.78	12	31.78	4
31.8	159.75	31.8	4	31.8	5	31.8	12	31.8	5	31.8	10	31.8	2	31.8	7	31.8	5	31.8	11
31.82	162	31.82	6	31.82	7	31.82	5	31.82	3	31.82	7	31.82	13	31.82	9	31.82	7	31.82	7
31.84	156.75	31.84	5	31.84	5	31.84	5	31.84	6	31.84	7	31.84	5	31.84	14	31.84	5	31.84	7
31.86	164.25	31.86	3	31.86	7	31.86	8	31.86	8	31.86	6	31.86	6	31.86	6	31.86	7	31.86	5
31.88	156.75	31.88	12	31.88	7	31.88	10	31.88	10	31.88	6	31.88	5	31.88	8	31.88	7	31.88	5
31.9	157.5	31.9	10	31.9	6	31.9	10	31.9	9	31.9	7	31.9	3	31.9	7	31.9	6	31.9	5
31.92	156.75	31.92	6	31.92	7	31.92	7	31.92	8	31.92	9	31.92	7	31.92	5	31.92	7	31.92	8
31.94	157.5	31.94	10	31.94	7	31.94	4	31.94	3	31.94	10	31.94	5	31.94	8	31.94	7	31.94	6
31.96	160.5	31.96	11	31.96	5	31.96	4	31.96	9	31.96	10	31.96	4	31.96	6	31.96	5	31.96	5
31.98	160.5	31.98	10	31.98	8	31.98	12	31.98	9	31.98	6	31.98	4	31.98	9	31.98	8	31.98	8
32	160.5	32	7	32	8	32	5	32	9	32	4	32	6	32	2	32	8	32	9
32.02	160.5	32.02	7	32.02	7	32.02	10	32.02	5	32.02	6	32.02	9	32.02	4	32.02	7	32.02	11
32.04	157.5	32.04	9	32.04	4	32.04	6	32.04	8	32.04	7	32.04	11	32.04	2	32.04	4	32.04	10
32.06	164.25	32.06	11	32.06	5	32.06	7	32.06	4	32.06	7	32.06	5	32.06	6	32.06	5	32.06	10
32.08	160.5	32.08	11	32.08	12	32.08	16	32.08	10	32.08	6	32.08	9	32.08	8	32.08	12	32.08	7
32.1	156	32.1	8	32.1	7	32.1	6	32.1	11	32.1	10	32.1	7	32.1	6	32.1	7	32.1	10
32.12	160.5	32.12	8	32.12	5	32.12	6	32.12	4	32.12	6	32.12	10	32.12	7	32.12	5	32.12	6
32.14	161.25	32.14	5	32.14	9	32.14	3	32.14	3	32.14	9	32.14	11	32.14	8	32.14	9	32.14	10
32.16	155.25	32.16	5	32.16	6	32.16	7	32.16	15	32.16	13	32.16	8	32.16	6	32.16	6	32.16	12
32.18	162	32.18	11	32.18	11	32.18	5	32.18	10	32.18	8	32.18	14	32.18	8	32.18	11	32.18	7
32.2	158.25	32.2	8	32.2	7	32.2	12	32.2	15	32.2	9	32.2	6	32.2	8	32.2	7	32.2	7
32.22	166.5	32.22	10	32.22	14	32.22	4	32.22	9	32.22	8	32.22	6	32.22	8	32.22	14	32.22	5
32.24	160.5	32.24	9	32.24	16	32.24	6	32.24	6	32.24	6	32.24	11	32.24	7	32.24	16	32.24	6
32.26	153.75	32.26	8	32.26	14	32.26	5	32.26	7	32.26	8	32.26	8	32.26	9	32.26	14	32.26	6
32.28	161.25	32.28	10	32.28	11	32.28	6	32.28	4	32.28	16	32.28	8	32.28	3	32.28	11	32.28	9
32.3	158.25	32.3	16	32.3	8	32.3	9	32.3	9	32.3	11	32.3	9	32.3	7	32.3	8	32.3	8
32.32	159.75	32.32	15	32.32	3	32.32	4	32.32	11	32.32	9	32.32	7	32.32	13	32.32	3	32.32	8
32.34	157.5	32.34	5	32.34	6	32.34	4	32.34	7	32.34	10	32.34	5	32.34	8	32.34	6	32.34	3
32.36	159	32.36	5	32.36	9	32.36	6	32.36	12	32.36	10	32.36	5	32.36	6	32.36	9	32.36	5
32.38	162	32.38	8	32.38	14	32.38	4	32.38	16	32.38	11	32.38	4	32.38	3	32.38	14	32.38	9
32.4	155.25	32.4	10	32.4	7	32.4	11	32.4	8	32.4	5	32.4	1	32.4	5	32.4	7	32.4	8
32.42	159	32.42	6	32.42	8	32.42	4	32.42	3	32.42	7	32.42	7	32.42	12	32.42	8	32.42	10
32.44	164.25	32.44	6	32.44	10	32.44	3	32.44	3	32.44	8	32.44	7	32.44	6	32.44	10	32.44	10
32.46	160.5	32.46	11	32.46	4	32.46	7	32.46	9	32.46	10	32.46	7	32.46	11	32.46	4	32.46	4
32.48	159	32.48	5	32.48	8	32.48	7	32.48	7	32.48	7	32.48	10	32.48	5	32.48	8	32.48	5
32.5	161.25	32.5	9	32.5	7	32.5	7	32.5	10	32.5	5	32.5	7	32.5	6	32.5	7	32.5	9
32.52	164.25	32.52	6	32.52	4	32.52	7	32.52	8	32.52	8	32.52	9	32.52	8	32.52	4	32.52	5
32.54	168	32.54	3	32.54	6	32.54	14	32.54	7	32.54	8	32.54	3	32.54	5	32.54	6	32.54	9
32.56	168	32.56	15	32.56	6	32.56	2	32.56	8	32.56	8	32.56	7	32.56	5	32.56	6	32.56	10
32.58	168.75	32.58	11	32.58	10	32.58	5	32.58	8	32.58	7	32.58	5	32.58	8	32.58	10	32.58	4
32.6	177	32.6	11	32.6	9	32.6	12	32.6	12	32.6	9	32.6	10	32.6	9	32.6	9	32.6	9
32.62	170.25	32.62	11	32.62	8	32.62	5	32.62	10	32.62	7	32.62	7	32.62	5	32.62	8	32.62	1
32.64	168.75	32.64	10	32.64	6	32.64	15	32.64	11	32.64	10	32.64	13	32.64	8	32.64	6	32.64	8
32.66	170.25	32.66	12	32.66	13	32.66	10	32.66	9	32.66	15	32.66	7	32.66	13	32.66	13	32.66	10
32.68	168	32.68	14	32.68	14	32.68	13	32.68	9	32.68	10	32.68	9	32.68	12	32.68	14	32.68	12
32.7	168.75	32.7	12	32.7	8	32.7	11	32.7	11	32.7	11	32.7	19	32.7	14	32.7	8	32.7	19
32.72	172.5	32.72	13	32.72	17	32.72	10	32.72	11	32.72	6	32.72	13	32.72	12	32.72	17	32.72	9
32.74	169.5	32.74	13	32.74	17	32.74	14	32.74	12	32.74	14	32.74	18	32.74	22	32.74	17	32.74	9
32.76	168.75	32.76	16	32.76	16	32.76	12	32.76	14	32.76	15	32.76	7	32.76	17	32.76	16	32.76	11
32.78	170.25	32.78	15	32.78	12	32.78	9	32.78	14	32.78	15	32.78	11	32.78	12	32.78	12	32.78	18
32.8	163.5	32.8	14	32.8	18	32.8	11	32.8	11	32.8	18	32.8	14	32.8	13	32.8	18	32.8	14
32.82	161.25	32.82	8	32.82	13	32.82	19	32.82	9	32.82	21	32.82	13	32.82	7	32.82	13	32.82	11
32.84	159	32.84	15	32.84	10	32.84	12	32.84	24	32.84	13	32.84	13	32.84	18	32.84	10	32.84	17
32.86	164.25	32.86	7	32.86	13	32.86	12	32.86	14	32.86	13	32.86	8	32.86	8	32.86	13	32.86	13
32.88	160.5	32.88	14	32.88	14	32.88	9	32.88	17	32.88	17	32.88	16	32.88	16	32.88	14	32.88	9
32.9	156	32.9	19	32.9	12	32.9	11	32.9	19	32.9	25	32.9	13	32.9	10	32.9	12	32.9	11
32.92	161.25	32.92	10	32.92	7	32.92	8	32.92	21	32.92	20	32.92	10	32.92	16	32.92	7	32.92	7
32.94	165	32.94	10	32.94	13	32.94	5	32.94	17	32.94	13	32.94	10	32.94	12	32.94	13	32.94	8
32.96	159.75	32.96	7	32.96	10	32.96	6	32.96	17	32.96	11	32.96	10	32.96	10	32.96	10	32.96	8
32.98	159.75	32.98	11	32.98	15	32.98	5	32.98	22	32.98	14	32.98	9	32.98	14	32.98	15	32.98	8
33	159	33	11	33	5	33	6	33	12	33	15	33	8	33	14	33	5	33	3
33.02	159	33.02	12	33.02	8	33.02	5	33.02	7	33.02	10	33.02	6	33.02	10	33.02	8	33.02	2
33.04	155.25	33.04	8	33.04	2	33.04	3	33.04	17	33.04	14	33.04	5	33.04	8	33.04	2	33.04	1
33.06	157.5	33.06	11	33.06	6	33.06	4	33.06	8	33.06	15	33.06	5	33.06	6	33.06	6	33.06	6
33.08	159.75	33.08	13	33.08	6	33.08	9	33.08	5	33.08	6	33.08	6	33.08	9	33.08	6	33.08	6
33.1	156.75	33.1	5	33.1	7	33.1	10	33.1	8	33.1	7	33.1	4	33.1	6	33.1	7	33.1	3
33.12	157.5	33.12	5	33.12	4	33.12	4	33.12	7	33.12	10	33.12	6	33.12	3	33.12	4	33.12	11
33.14	159.75	33.14	7	33.14	5	33.14	8	33.14	12	33.14	8	33.14	9	33.14	6	33.14	5	33.14	3
33.16	156.75	33.16	6	33.16	3	33.16	3	33.16	5	33.16	8	33.16	6	33.16	4	33.16	3	33.16	4
33.18	164.25	33.18	7	33.18	9	33.18	7	33.18	7	33.18	8	33.18	3	33.18	8	33.18	9	33.18	6
33.2	160.5	33.2	11	33.2	4	33.2	7	33.2	2	33.2	5	33.2	5	33.2	6	33.2	4	33.2	2
33.22	161.25	33.22	5	33.22	6	33.22	6	33.22	4	33.22	8	33.22	7	33.22	6	33.22	6	33.22	8
33.24	159.75	33.24	11	33.24	8	33.24	4	33.24	11	33.24	5	33.24	13	33.24	6	33.24	8	33.24	2
33.26	164.25	33.26	8	33.26	9	33.26	5	33.26	4	33.26	7	33.26	6	33.26	2	33.26	9	33.26	4
33.28	168.75	33.28	7	33.28	4	33.28	3	33.28	8	33.28	3	33.28	1	33.28	8	33.28	4	33.28	6
33.3	165	33.3	11	33.3	4	33.3	8	33.3	6	33.3	5	33.3	7	33.3	6	33.3	4	33.3	8
33.32	169.5	33.32	7	33.32	5	33.32	5	33.32	4	33.32	6	33.32	8	33.32	8	33.32	5	33.32	7
33.34	162.75	33.34	9	33.34	7	33.34	4	33.34	7	33.34	7	33.34	8	33.34	7	33.34	7	33.34	4
33.36	164.25	33.36	4	33.36	12	33.36	9	33.36	5	33.36	6	33.36	6	33.36	12	33.36	12	33.36	11
33.38	168	33.38	12	33.38	4	33.38	12	33.38	2	33.38	12	33.38	11	33.38	13	33.38	4	33.38	10
33.4	158.25	33.4	10	33.4	7	33.4	4	33.4	12	33.4	7	33.4	8	33.4	6	33.4	7	33.4	9
33.42	160.5	33.42	7	33.42	12	33.42	7	33.42	12	33.42	9	33.42	8	33.42	3	33.42	12	33.42	8
33.44	159	33.44	4	33.44	13	33.44	10	33.44	10	33.44	8	33.44	11	33.44	7	33.44	13	33.44	8
33.46	158.25	33.46	6	33.46	6	33.46	6	33.46	8	33.46	8	33.46	11	33.46	11	33.46	6	33.46	6
33.48	159.75	33.48	7	33.48	12	33.48	10	33.48	9	33.48	9	33.48	7	33.48	18	33.48	12	33.48	8
33.5	156	33.5	10	33.5	7	33.5	6	33.5	5	33.5	8	33.5	11	33.5	9	33.5	7	33.5	12
33.52	163.5	33.52	8	33.52	7	33.52	4	33.52	11	33.52	11	33.52	5	33.52	12	33.52	7	33.52	8
33.54	160.5	33.54	8	33.54	3	33.54	5	33.54	5	33.54	11	33.54	7	33.54	7	33.54	3	33.54	8
33.56	160.5	33.56	11	33.56	10	33.56	6	33.56	10	33.56	9	33.56	3	33.56	5	33.56	10	33.56	4
33.58	159.75	33.58	8	33.58	9	33.58	9	33.58	3	33.58	13	33.58	5	33.58	9	33.58	9	33.58	7
33.6	161.25	33.6	7	33.6	6	33.6	5	33.6	13	33.6	7	33.6	7	33.6	5	33.6	6	33.6	7
33.62	156	33.62	4	33.62	13	33.62	12	33.62	4	33.62	3	33.62	8	33.62	8	33.62	13	33.62	8
33.64	162.75	33.64	5	33.64	7	33.64	5	33.64	8	33.64	13	33.64	6	33.64	5	33.64	7	33.64	5
33.66	171	33.66	7	33.66	12	33.66	2	33.66	9	33.66	13	33.66	7	33.66	7	33.66	12	33.66	6
33.68	159.75	33.68	5	33.68	4	33.68	3	33.68	5	33.68	5	33.68	5	33.68	4	33.68	4	33.68	10
33.7	162	33.7	3	33.7	7	33.7	8	33.7	4	33.7	6	33.7	7	33.7	4	33.7	7	33.7	6
33.72	159.75	33.72	9	33.72	4	33.72	4	33.72	2	33.72	8	33.72	3	33.72	8	33.72	4	33.72	5
33.74	163.5	33.74	11	33.74	9	33.74	8	33.74	10	33.74	7	33.74	4	33.74	5	33.74	9	33.74	16
33.76	165.75	33.76	9	33.76	3	33.76	8	33.76	7	33.76	11	33.76	11	33.76	7	33.76	3	33.76	12
33.78	158.25	33.78	8	33.78	4	33.78	5	33.78	11	33.78	10	33.78	7	33.78	6	33.78	4	33.78	12
33.8	161.25	33.8	7	33.8	8	33.8	5	33.8	10	33.8	8	33.8	8	33.8	7	33.8	8	33.8	9
33.82	158.25	33.82	8	33.82	12	33.82	7	33.82	4	33.82	13	33.82	9	33.82	12	33.82	12	33.82	7
33.84	154.5	33.84	10	33.84	10	33.84	6	33.84	9	33.84	10	33.84	8	33.84	6	33.84	10	33.84	3
33.86	160.5	33.86	8	33.86	5	33.86	8	33.86	8	33.86	12	33.86	8	33.86	5	33.86	5	33.86	5
33.88	162	33.88	8	33.88	12	33.88	7	33.88	14	33.88	9	33.88	7	33.88	7	33.88	12	33.88	7
33.9	156.75	33.9	6	33.9	9	33.9	6	33.9	10	33.9	11	33.9	5	33.9	6	33.9	9	33.9	5
33.92	158.25	33.92	8	33.92	10	33.92	9	33.92	9	33.92	8	33.92	8	33.92	5	33.92	10	33.92	7
33.94	159.75	33.94	10	33.94	6	33.94	7	33.94	10	33.94	6	33.94	6	33.94	8	33.94	6	33.94	9
33.96	157.5	33.96	14	33.96	7	33.96	6	33.96	7	33.96	9	33.96	6	33.96	6	33.96	7	33.96	3
33.98	161.25	33.98	5	33.98	9	33.98	4	33.98	8	33.98	8	33.98	7	33.98	9	33.98	9	33.98	3
34	154.5	34	8	34	8	34	9	34	10	34	9	34	6	34	8	34	8	34	5
34.02	162.75	34.02	10	34.02	8	34.02	4	34.02	13	34.02	9	34.02	5	34.02	6	34.02	8	34.02	4
34.04	158.25	34.04	8	34.04	5	34.04	4	34.04	4	34.04	8	34.04	3	34.04	7	34.04	5	34.04	4
34.06	163.5	34.06	10	34.06	7	34.06	9	34.06	8	34.06	4	34.06	3	34.06	7	34.06	7	34.06	8
34.08	159.75	34.08	6	34.08	7	34.08	4	34.08	6	34.08	10	34.08	6	34.08	8	34.08	7	34.08	5
34.1	162.75	34.1	6	34.1	6	34.1	9	34.1	6	34.1	3	34.1	1	34.1	5	34.1	6	34.1	11
34.12	168	34.12	10	34.12	8	34.12	2	34.12	4	34.12	7	34.12	4	34.12	6	34.12	8	34.12	7
34.14	164.25	34.14	11	34.14	8	34.14	5	34.14	11	34.14	4	34.14	13	34.14	11	34.14	8	34.14	7
34.16	165	34.16	9	34.16	9	34.16	7	34.16	4	34.16	8	34.16	5	34.16	5	34.16	9	34.16	6
34.18	165	34.18	6	34.18	10	34.18	4	34.18	10	34.18	9	34.18	6	34.18	10	34.18	10	34.18	9
34.2	169.5	34.2	9	34.2	6	34.2	9	34.2	4	34.2	3	34.2	8	34.2	16	34.2	6	34.2	6
34.22	168	34.22	5	34.22	6	34.22	6	34.22	8	34.22	9	34.22	12	34.22	3	34.22	6	34.22	7
34.24	167.25	34.24	13	34.24	4	34.24	11	34.24	14	34.24	8	34.24	6	34.24	2	34.24	4	34.24	6
34.26	168.75	34.26	10	34.26	13	34.26	10	34.26	5	34.26	9	34.26	5	34.26	13	34.26	13	34.26	10
34.28	166.5	34.28	15	34.28	6	34.28	8	34.28	7	34.28	9	34.28	11	34.28	9	34.28	6	34.28	12
34.3	165	34.3	12	34.3	11	34.3	13	34.3	7	34.3	14	34.3	10	34.3	16	34.3	11	34.3	6
34.32	164.25	34.32	17	34.32	6	34.32	9	34.32	14	34.32	6	34.32	14	34.32	11	34.32	6	34.32	9
34.34	165.75	34.34	4	34.34	10	34.34	19	34.34	11	34.34	11	34.34	7	34.34	17	34.34	10	34.34	13
34.36	165.75	34.36	16	34.36	12	34.36	15	34.36	21	34.36	5	34.36	11	34.36	9	34.36	12	34.36	15
34.38	162.75	34.38	14	34.38	10	34.38	12	34.38	18	34.38	12	34.38	20	34.38	10	34.38	10	34.38	12
34.4	161.25	34.4	13	34.4	13	34.4	15	34.4	13	34.4	19	34.4	10	34.4	13	34.4	13	34.4	19
34.42	160.5	34.42	17	34.42	13	34.42	10	34.42	17	34.42	17	34.42	12	34.42	15	34.42	13	34.42	16
34.44	172.5	34.44	12	34.44	16	34.44	7	34.44	20	34.44	13	34.44	17	34.44	9	34.44	16	34.44	12
34.46	168.75	34.46	8	34.46	10	34.46	7	34.46	12	34.46	22	34.46	11	34.46	15	34.46	10	34.46	9
34.48	166.5	34.48	6	34.48	10	34.48	9	34.48	12	34.48	16	34.48	6	34.48	8	34.48	10	34.48	6
34.5	164.25	34.5	12	34.5	17	34.5	16	34.5	19	34.5	18	34.5	14	34.5	13	34.5	17	34.5	8
34.52	165	34.52	10	34.52	14	34.52	11	34.52	19	34.52	21	34.52	10	34.52	14	34.52	14	34.52	5
34.54	164.25	34.54	9	34.54	17	34.54	13	34.54	12	34.54	14	34.54	4	34.54	9	34.54	17	34.54	10
34.56	165	34.56	15	34.56	14	34.56	9	34.56	15	34.56	12	34.56	9	34.56	13	34.56	14	34.56	15
34.58	165	34.58	11	34.58	8	34.58	3	34.58	14	34.58	13	34.58	15	34.58	9	34.58	8	34.58	11
34.6	160.5	34.6	8	34.6	10	34.6	11	34.6	8	34.6	14	34.6	12	34.6	6	34.6	10	34.6	4
34.62	167.25	34.62	9	34.62	18	34.62	7	34.62	15	34.62	15	34.62	10	34.62	13	34.62	18	34.62	12
34.64	159.75	34.64	10	34.64	13	34.64	10	34.64	8	34.64	11	34.64	11	34.64	14	34.64	13	34.64	7
34.66	159	34.66	8	34.66	10	34.66	6	34.66	14	34.66	5	34.66	10	34.66	11	34.66	10	34.66	7
34.68	165.75	34.68	12	34.68	9	34.68	6	34.68	13	34.68	11	34.68	10	34.68	13	34.68	9	34.68	20
34.7	159	34.7	9	34.7	15	34.7	10	34.7	16	34.7	16	34.7	14	34.7	12	34.7	15	34.7	7
34.72	163.5	34.72	8	34.72	18	34.72	7	34.72	15	34.72	12	34.72	8	34.72	7	34.72	18	34.72	7
34.74	164.25	34.74	8	34.74	10	34.74	11	34.74	11	34.74	15	34.74	12	34.74	16	34.74	10	34.74	6
34.76	162.75	34.76	10	34.76	16	34.76	11	34.76	9	34.76	15	34.76	12	34.76	11	34.76	16	34.76	7
34.78	165.75	34.78	12	34.78	9	34.78	11	34.78	12	34.78	9	34.78	14	34.78	12	34.78	9	34.78	7
34.8	166.5	34.8	14	34.8	14	34.8	7	34.8	8	34.8	10	34.8	12	34.8	13	34.8	14	34.8	10
34.82	158.25	34.82	10	34.82	8	34.82	9	34.82	12	34.82	16	34.82	8	34.82	7	34.82	8	34.82	4
34.84	165	34.84	9	34.84	9	34.84	11	34.84	10	34.84	14	34.84	12	34.84	7	34.84	9	34.84	10
34.86	162.75	34.86	7	34.86	3	34.86	12	34.86	9	34.86	14	34.86	11	34.86	9	34.86	3	34.86	8
34.88	162.75	34.88	15	34.88	10	34.88	5	34.88	11	34.88	11	34.88	10	34.88	12	34.88	10	34.88	8
34.9	166.5	34.9	11	34.9	8	34.9	10	34.9	18	34.9	10	34.9	9	34.9	11	34.9	8	34.9	8
34.92	165.75	34.92	8	34.92	11	34.92	9	34.92	9	34.92	9	34.92	6	34.92	9	34.92	11	34.92	11
34.94	168	34.94	15	34.94	12	34.94	8	34.94	12	34.94	12	34.94	6	34.94	13	34.94	12	34.94	18
34.96	162	34.96	12	34.96	9	34.96	7	34.96	9	34.96	9	34.96	9	34.96	9	34.96	9	34.96	15
34.98	168.75	34.98	14	34.98	6	34.98	3	34.98	17	34.98	12	34.98	7	34.98	7	34.98	6	34.98	15
35	162.75	35	10	35	11	35	13	35	12	35	17	35	11	35	15	35	11	35	3
35.02	163.5	35.02	5	35.02	11	35.02	9	35.02	15	35.02	14	35.02	8	35.02	9	35.02	11	35.02	5
35.04	156.75	35.04	12	35.04	10	35.04	13	35.04	12	35.04	13	35.04	8	35.04	9	35.04	10	35.04	8
35.06	166.5	35.06	16	35.06	10	35.06	14	35.06	14	35.06	15	35.06	9	35.06	9	35.06	10	35.06	8
35.08	161.25	35.08	9	35.08	7	35.08	8	35.08	7	35.08	12	35.08	10	35.08	12	35.08	7	35.08	8
35.1	166.5	35.1	7	35.1	15	35.1	8	35.1	19	35.1	11	35.1	8	35.1	13	35.1	15	35.1	18
35.12	166.5	35.12	13	35.12	9	35.12	12	35.12	12	35.12	12	35.12	6	35.12	12	35.12	9	35.12	15
35.14	162.75	35.14	13	35.14	12	35.14	8	35.14	9	35.14	14	35.14	14	35.14	10	35.14	12	35.14	8
35.16	166.5	35.16	13	35.16	7	35.16	6	35.16	10	35.16	11	35.16	17	35.16	7	35.16	7	35.16	14
35.18	165.75	35.18	15	35.18	15	35.18	10	35.18	9	35.18	17	35.18	12	35.18	9	35.18	15	35.18	11
35.2	159	35.2	15	35.2	10	35.2	8	35.2	13	35.2	11	35.2	14	35.2	13	35.2	10	35.2	10
35.22	156.75	35.22	12	35.22	9	35.22	11	35.22	12	35.22	11	35.22	9	35.22	12	35.22	9	35.22	7
35.24	158.25	35.24	9	35.24	8	35.24	3	35.24	7	35.24	12	35.24	8	35.24	6	35.24	8	35.24	13
35.26	153.75	35.26	9	35.26	10	35.26	6	35.26	10	35.26	14	35.26	7	35.26	3	35.26	10	35.26	8
35.28	158.25	35.28	10	35.28	17	35.28	10	35.28	18	35.28	16	35.28	5	35.28	11	35.28	17	35.28	5
35.3	159	35.3	12	35.3	10	35.3	4	35.3	10	35.3	11	35.3	6	35.3	9	35.3	10	35.3	7
35.32	156.75	35.32	11	35.32	5	35.32	6	35.32	12	35.32	13	35.32	10	35.32	8	35.32	5	35.32	2
35.34	163.5	35.34	7	35.34	6	35.34	4	35.34	10	35.34	6	35.34	5	35.34	7	35.34	6	35.34	9
35.36	156	35.36	5	35.36	6	35.36	8	35.36	10	35.36	11	35.36	9	35.36	8	35.36	6	35.36	5
35.38	158.25	35.38	7	35.38	10	35.38	8	35.38	15	35.38	9	35.38	6	35.38	8	35.38	10	35.38	7
35.4	156.75	35.4	7	35.4	10	35.4	4	35.4	7	35.4	10	35.4	17	35.4	9	35.4	10	35.4	3
35.42	162	35.42	10	35.42	6	35.42	7	35.42	9	35.42	7	35.42	7	35.42	5	35.42	6	35.42	4
35.44	163.5	35.44	4	35.44	6	35.44	2	35.44	7	35.44	3	35.44	8	35.44	4	35.44	6	35.44	5
35.46	162	35.46	4	35.46	4	35.46	7	35.46	6	35.46	8	35.46	4	35.46	7	35.46	4	35.46	7
35.48	162.75	35.48	1	35.48	9	35.48	2	35.48	4	35.48	8	35.48	3	35.48	4	35.48	9	35.48	10
35.5	165	35.5	8	35.5	12	35.5	6	35.5	6	35.5	8	35.5	4	35.5	10	35.5	12	35.5	3
35.52	164.25	35.52	6	35.52	6	35.52	4	35.52	11	35.52	4	35.52	3	35.52	4	35.52	6	35.52	5
35.54	164.25	35.54	7	35.54	5	35.54	12	35.54	6	35.54	9	35.54	7	35.54	7	35.54	5	35.54	3
35.56	167.25	35.56	6	35.56	3	35.56	10	35.56	9	35.56	2	35.56	2	35.56	9	35.56	3	35.56	8
35.58	165	35.58	5	35.58	4	35.58	12	35.58	12	35.58	5	35.58	7	35.58	7	35.58	4	35.58	6
35.6	168.75	35.6	11	35.6	9	35.6	10	35.6	7	35.6	9	35.6	8	35.6	10	35.6	9	35.6	8
35.62	166.5	35.62	10	35.62	8	35.62	10	35.62	12	35.62	9	35.62	15	35.62	7	35.62	8	35.62	11
35.64	160.5	35.64	9	35.64	4	35.64	11	35.64	8	35.64	9	35.64	5	35.64	18	35.64	4	35.64	15
35.66	165	35.66	10	35.66	11	35.66	8	35.66	10	35.66	8	35.66	16	35.66	6	35.66	11	35.66	14
35.68	163.5	35.68	7	35.68	11	35.68	5	35.68	10	35.68	8	35.68	12	35.68	20	35.68	11	35.68	11
35.7	165	35.7	19	35.7	12	35.7	16	35.7	10	35.7	12	35.7	9	35.7	10	35.7	12	35.7	15
35.72	162.75	35.72	12	35.72	15	35.72	15	35.72	13	35.72	11	35.72	13	35.72	13	35.72	15	35.72	16
35.74	160.5	35.74	11	35.74	11	35.74	9	35.74	10	35.74	13	35.74	8	35.74	7	35.74	11	35.74	9
35.76	158.25	35.76	15	35.76	13	35.76	5	35.76	17	35.76	14	35.76	7	35.76	12	35.76	13	35.76	8
35.78	162.75	35.78	18	35.78	7	35.78	5	35.78	12	35.78	15	35.78	13	35.78	8	35.78	7	35.78	13
35.8	161.25	35.8	13	35.8	11	35.8	6	35.8	13	35.8	15	35.8	13	35.8	9	35.8	11	35.8	7
35.82	159.75	35.82	16	35.82	10	35.82	9	35.82	13	35.82	17	35.82	11	35.82	6	35.82	10	35.82	10
35.84	157.5	35.84	3	35.84	4	35.84	8	35.84	12	35.84	16	35.84	8	35.84	15	35.84	4	35.84	7
35.86	162	35.86	6	35.86	9	35.86	10	35.86	11	35.86	14	35.86	3	35.86	12	35.86	9	35.86	7
35.88	164.25	35.88	7	35.88	9	35.88	8	35.88	10	35.88	10	35.88	8	35.88	5	35.88	9	35.88	8
35.9	166.5	35.9	8	35.9	4	35.9	7	35.9	11	35.9	8	35.9	7	35.9	11	35.9	4	35.9	4
35.92	163.5	35.92	6	35.92	8	35.92	8	35.92	6	35.92	4	35.92	3	35.92	7	35.92	8	35.92	5
35.94	165.75	35.94	9	35.94	5	35.94	8	35.94	11	35.94	14	35.94	11	35.94	15	35.94	5	35.94	7
35.96	171.75	35.96	13	35.96	7	35.96	11	35.96	10	35.96	14	35.96	14	35.96	8	35.96	7	35.96	10
35.98	172.5	35.98	7	35.98	9	35.98	10	35.98	12	35.98	10	35.98	11	35.98	11	35.98	9	35.98	6
36	169.5	36	12	36	10	36	7	36	6	36	7	36	9	36	11	36	10	36	12
36.02	169.5	36.02	24	36.02	11	36.02	12	36.02	16	36.02	13	36.02	10	36.02	8	36.02	11	36.02	6
36.04	169.5	36.04	14	36.04	7	36.04	7	36.04	7	36.04	12	36.04	14	36.04	7	36.04	7	36.04	10
36.06	172.5	36.06	10	36.06	12	36.06	13	36.06	7	36.06	9	36.06	20	36.06	16	36.06	12	36.06	12
36.08	170.25	36.08	14	36.08	18	36.08	17	36.08	8	36.08	12	36.08	21	36.08	17	36.08	18	36.08	10
36.1	171.75	36.1	12	36.1	12	36.1	16	36.1	22	36.1	12	36.1	18	36.1	12	36.1	12	36.1	21
36.12	167.25	36.12	13	36.12	18	36.12	9	36.12	21	36.12	10	36.12	15	36.12	17	36.12	18	36.12	6
36.14	168	36.14	10	36.14	19	36.14	11	36.14	14	36.14	16	36.14	16	36.14	22	36.14	19	36.14	18
36.16	164.25	36.16	15	36.16	13	36.16	19	36.16	21	36.16	19	36.16	17	36.16	20	36.16	13	36.16	23
36.18	168	36.18	19	36.18	11	36.18	17	36.18	27	36.18	21	36.18	16	36.18	17	36.18	11	36.18	12
36.2	166.5	36.2	10	36.2	15	36.2	10	36.2	20	36.2	12	36.2	19	36.2	18	36.2	15	36.2	14
36.22	174	36.22	19	36.22	14	36.22	9	36.22	17	36.22	15	36.22	14	36.22	13	36.22	14	36.22	13
36.24	169.5	36.24	14	36.24	19	36.24	18	36.24	17	36.24	24	36.24	10	36.24	13	36.24	19	36.24	14
36.26	164.25	36.26	17	36.26	17	36.26	11	36.26	13	36.26	19	36.26	13	36.26	12	36.26	17	36.26	12
36.28	167.25	36.28	13	36.28	19	36.28	16	36.28	19	36.28	16	36.28	11	36.28	8	36.28	19	36.28	16
36.3	163.5	36.3	16	36.3	13	36.3	8	36.3	12	36.3	25	36.3	12	36.3	16	36.3	13	36.3	7
36.32	165	36.32	7	36.32	16	36.32	10	36.32	17	36.32	14	36.32	15	36.32	12	36.32	16	36.32	11
36.34	168.75	36.34	14	36.34	16	36.34	7	36.34	21	36.34	17	36.34	21	36.34	14	36.34	16	36.34	14
36.36	162.75	36.36	11	36.36	13	36.36	14	36.36	16	36.36	14	36.36	12	36.36	11	36.36	13	36.36	10
36.38	156.75	36.38	13	36.38	10	36.38	6	36.38	10	36.38	18	36.38	6	36.38	14	36.38	10	36.38	7
36.4	158.25	36.4	4	36.4	15	36.4	7	36.4	15	36.4	7	36.4	10	36.4	10	36.4	15	36.4	12
36.42	161.25	36.42	6	36.42	7	36.42	6	36.42	14	36.42	14	36.42	5	36.42	6	36.42	7	36.42	9
36.44	164.25	36.44	12	36.44	13	36.44	2	36.44	9	36.44	8	36.44	8	36.44	17	36.44	13	36.44	9
36.46	163.5	36.46	12	36.46	8	36.46	5	36.46	8	36.46	16	36.46	10	36.46	6	36.46	8	36.46	6
36.48	163.5	36.48	7	36.48	15	36.48	5	36.48	9	36.48	12	36.48	6	36.48	5	36.48	15	36.48	19
36.5	157.5	36.5	10	36.5	11	36.5	9	36.5	11	36.5	13	36.5	7	36.5	5	36.5	11	36.5	12
36.52	161.25	36.52	9	36.52	6	36.52	6	36.52	12	36.52	9	36.52	7	36.52	7	36.52	6	36.52	8
36.54	163.5	36.54	9	36.54	9	36.54	5	36.54	11	36.54	15	36.54	3	36.54	8	36.54	9	36.54	4
36.56	160.5	36.56	8	36.56	9	36.56	7	36.56	5	36.56	9	36.56	6	36.56	6	36.56	9	36.56	12
36.58	162	36.58	5	36.58	9	36.58	8	36.58	7	36.58	8	36.58	7	36.58	4	36.58	9	36.58	6
36.6	157.5	36.6	10	36.6	9	36.6	10	36.6	11	36.6	9	36.6	13	36.6	8	36.6	9	36.6	11
36.62	162	36.62	11	36.62	15	36.62	8	36.62	8	36.62	9	36.62	9	36.62	8	36.62	15	36.62	8
36.64	162	36.64	10	36.64	8	36.64	10	36.64	13	36.64	7	36.64	9	36.64	8	36.64	8	36.64	9
36.66	162	36.66	13	36.66	12	36.66	4	36.66	7	36.66	4	36.66	4	36.66	3	36.66	12	36.66	10
36.68	153	36.68	5	36.68	10	36.68	7	36.68	11	36.68	9	36.68	6	36.68	7	36.68	10	36.68	3
36.7	157.5	36.7	5	36.7	3	36.7	3	36.7	7	36.7	7	36.7	6	36.7	9	36.7	3	36.7	4
36.72	162	36.72	11	36.72	5	36.72	7	36.72	10	36.72	8	36.72	6	36.72	8	36.72	5	36.72	6
36.74	161.25	36.74	12	36.74	7	36.74	7	36.74	9	36.74	8	36.74	10	36.74	7	36.74	7	36.74	2
36.76	161.25	36.76	9	36.76	8	36.76	9	36.76	6	36.76	9	36.76	8	36.76	14	36.76	8	36.76	9
36.78	159	36.78	8	36.78	10	36.78	8	36.78	10	36.78	8	36.78	5	36.78	9	36.78	10	36.78	9
36.8	158.25	36.8	8	36.8	8	36.8	13	36.8	9	36.8	13	36.8	10	36.8	10	36.8	8	36.8	10
36.82	157.5	36.82	10	36.82	8	36.82	7	36.82	7	36.82	14	36.82	7	36.82	5	36.82	8	36.82	7
36.84	158.25	36.84	8	36.84	7	36.84	6	36.84	8	36.84	13	36.84	9	36.84	8	36.84	7	36.84	5
36.86	165.75	36.86	5	36.86	7	36.86	9	36.86	11	36.86	8	36.86	9	36.86	8	36.86	7	36.86	2
36.88	160.5	36.88	7	36.88	12	36.88	7	36.88	4	36.88	9	36.88	8	36.88	8	36.88	12	36.88	4
36.9	163.5	36.9	6	36.9	10	36.9	4	36.9	10	36.9	12	36.9	6	36.9	5	36.9	10	36.9	10
36.92	162	36.92	10	36.92	12	36.92	8	36.92	5	36.92	7	36.92	10	36.92	9	36.92	12	36.92	6
36.94	162	36.94	7	36.94	7	36.94	9	36.94	7	36.94	12	36.94	7	36.94	8	36.94	7	36.94	6
36.96	163.5	36.96	6	36.96	7	36.96	11	36.96	12	36.96	11	36.96	8	36.96	6	36.96	7	36.96	7
36.98	165.75	36.98	6	36.98	6	36.98	6	36.98	12	36.98	9	36.98	7	36.98	3	36.98	6	36.98	5
37	162.75	37	11	37	2	37	7	37	9	37	5	37	7	37	8	37	2	37	7
37.02	159	37.02	8	37.02	15	37.02	8	37.02	10	37.02	9	37.02	7	37.02	10	37.02	15	37.02	6
37.04	166.5	37.04	8	37.04	5	37.04	13	37.04	15	37.04	6	37.04	18	37.04	6	37.04	5	37.04	7
37.06	163.5	37.06	8	37.06	8	37.06	7	37.06	10	37.06	10	37.06	1	37.06	10	37.06	8	37.06	3
37.08	160.5	37.08	10	37.08	4	37.08	15	37.08	12	37.08	7	37.08	12	37.08	6	37.08	4	37.08	6
37.1	163.5	37.1	8	37.1	5	37.1	6	37.1	6	37.1	9	37.1	9	37.1	7	37.1	5	37.1	10
37.12	165.75	37.12	9	37.12	11	37.12	7	37.12	10	37.12	13	37.12	11	37.12	7	37.12	11	37.12	3
37.14	167.25	37.14	7	37.14	13	37.14	13	37.14	8	37.14	11	37.14	3	37.14	10	37.14	13	37.14	10
37.16	168	37.16	13	37.16	7	37.16	8	37.16	8	37.16	8	37.16	12	37.16	10	37.16	7	37.16	7
37.18	159	37.18	7	37.18	8	37.18	12	37.18	11	37.18	8	37.18	11	37.18	11	37.18	8	37.18	10
37.2	162.75	37.2	12	37.2	16	37.2	8	37.2	12	37.2	7	37.2	20	37.2	11	37.2	16	37.2	6
37.22	165.75	37.22	9	37.22	8	37.22	12	37.22	10	37.22	13	37.22	10	37.22	14	37.22	8	37.22	12
37.24	164.25	37.24	16	37.24	13	37.24	10	37.24	14	37.24	12	37.24	12	37.24	22	37.24	13	37.24	10
37.26	165.75	37.26	18	37.26	13	37.26	5	37.26	13	37.26	10	37.26	16	37.26	17	37.26	13	37.26	9
37.28	162	37.28	8	37.28	14	37.28	9	37.28	10	37.28	12	37.28	8	37.28	14	37.28	14	37.28	7
37.3	171	37.3	13	37.3	13	37.3	10	37.3	12	37.3	14	37.3	14	37.3	14	37.3	13	37.3	7
37.32	163.5	37.32	19	37.32	10	37.32	12	37.32	14	37.32	11	37.32	9	37.32	13	37.32	10	37.32	9
37.34	166.5	37.34	10	37.34	10	37.34	7	37.34	12	37.34	8	37.34	10	37.34	11	37.34	10	37.34	15
37.36	162.75	37.36	11	37.36	11	37.36	18	37.36	11	37.36	17	37.36	10	37.36	10	37.36	11	37.36	14
37.38	167.25	37.38	10	37.38	18	37.38	9	37.38	6	37.38	17	37.38	6	37.38	11	37.38	18	37.38	7
37.4	164.25	37.4	13	37.4	8	37.4	5	37.4	11	37.4	16	37.4	9	37.4	13	37.4	8	37.4	9
37.42	167.25	37.42	11	37.42	15	37.42	12	37.42	15	37.42	13	37.42	12	37.42	6	37.42	15	37.42	13
37.44	165.75	37.44	11	37.44	7	37.44	9	37.44	13	37.44	9	37.44	7	37.44	13	37.44	7	37.44	12
37.46	168.75	37.46	11	37.46	7	37.46	12	37.46	9	37.46	17	37.46	11	37.46	11	37.46	7	37.46	9
37.48	172.5	37.48	12	37.48	7	37.48	5	37.48	7	37.48	8	37.48	15	37.48	13	37.48	7	37.48	14
37.5	167.25	37.5	16	37.5	8	37.5	8	37.5	17	37.5	10	37.5	14	37.5	15	37.5	8	37.5	16
37.52	169.5	37.52	11	37.52	11	37.52	9	37.52	13	37.52	12	37.52	7	37.52	14	37.52	11	37.52	10
37.54	158.25	37.54	10	37.54	9	37.54	14	37.54	16	37.54	8	37.54	6	37.54	5	37.54	9	37.54	15
37.56	167.25	37.56	13	37.56	7	37.56	15	37.56	16	37.56	16	37.56	11	37.56	11	37.56	7	37.56	6
37.58	159.75	37.58	20	37.58	18	37.58	15	37.58	20	37.58	19	37.58	9	37.58	13	37.58	18	37.58	7
37.6	165.75	37.6	12	37.6	15	37.6	11	37.6	17	37.6	16	37.6	9	37.6	10	37.6	15	37.6	9
37.62	159	37.62	13	37.62	15	37.62	9	37.62	10	37.62	12	37.62	15	37.62	20	37.62	15	37.62	13
37.64	164.25	37.64	16	37.64	13	37.64	8	37.64	9	37.64	13	37.64	9	37.64	15	37.64	13	37.64	11
37.66	162.75	37.66	10	37.66	12	37.66	7	37.66	15	37.66	20	37.66	17	37.66	17	37.66	12	37.66	12
37.68	162.75	37.68	16	37.68	10	37.68	7	37.68	11	37.68	14	37.68	10	37.68	9	37.68	10	37.68	7
37.7	165.75	37.7	13	37.7	12	37.7	17	37.7	19	37.7	18	37.7	7	37.7	14	37.7	12	37.7	8
37.72	157.5	37.72	15	37.72	12	37.72	12	37.72	11	37.72	17	37.72	8	37.72	7	37.72	12	37.72	13
37.74	159.75	37.74	14	37.74	10	37.74	9	37.74	13	37.74	14	37.74	13	37.74	13	37.74	10	37.74	8
37.76	160.5	37.76	11	37.76	11	37.76	3	37.76	15	37.76	16	37.76	8	37.76	11	37.76	11	37.76	10
37.78	161.25	37.78	9	37.78	16	37.78	5	37.78	20	37.78	9	37.78	3	37.78	10	37.78	16	37.78	8
37.8	156	37.8	7	37.8	14	37.8	4	37.8	8	37.8	8	37.8	8	37.8	13	37.8	14	37.8	15
37.82	164.25	37.82	8	37.82	12	37.82	7	37.82	8	37.82	12	37.82	10	37.82	15	37.82	12	37.82	5
37.84	158.25	37.84	8	37.84	8	37.84	4	37.84	8	37.84	11	37.84	9	37.84	18	37.84	8	37.84	5
37.86	164.25	37.86	6	37.86	6	37.86	2	37.86	9	37.86	19	37.86	8	37.86	10	37.86	6	37.86	9
37.88	159	37.88	4	37.88	6	37.88	7	37.88	10	37.88	8	37.88	4	37.88	10	37.88	6	37.88	6
37.9	160.5	37.9	7	37.9	8	37.9	5	37.9	10	37.9	13	37.9	11	37.9	8	37.9	8	37.9	6
37.92	162	37.92	2	37.92	10	37.92	6	37.92	10	37.92	12	37.92	5	37.92	5	37.92	10	37.92	6
37.94	156	37.94	7	37.94	6	37.94	7	37.94	7	37.94	7	37.94	7	37.94	10	37.94	6	37.94	8
37.96	156.75	37.96	6	37.96	4	37.96	4	37.96	13	37.96	9	37.96	4	37.96	6	37.96	4	37.96	4
37.98	156.75	37.98	4	37.98	5	37.98	7	37.98	8	37.98	8	37.98	8	37.98	9	37.98	5	37.98	8
38	156.75	38	6	38	6	38	6	38	8	38	10	38	3	38	8	38	6	38	10
38.02	157.5	38.02	3	38.02	6	38.02	5	38.02	4	38.02	12	38.02	3	38.02	3	38.02	6	38.02	5
38.04	156	38.04	4	38.04	7	38.04	5	38.04	5	38.04	11	38.04	8	38.04	5	38.04	7	38.04	5
38.06	161.25	38.06	9	38.06	6	38.06	5	38.06	7	38.06	7	38.06	2	38.06	7	38.06	6	38.06	7
38.08	158.25	38.08	8	38.08	8	38.08	5	38.08	2	38.08	6	38.08	6	38.08	7	38.08	8	38.08	3
38.1	159.75	38.1	11	38.1	6	38.1	3	38.1	7	38.1	10	38.1	9	38.1	8	38.1	6	38.1	6
38.12	159.75	38.12	4	38.12	7	38.12	6	38.12	8	38.12	4	38.12	6	38.12	5	38.12	7	38.12	3
38.14	160.5	38.14	4	38.14	4	38.14	1	38.14	4	38.14	10	38.14	9	38.14	8	38.14	4	38.14	3
38.16	156.75	38.16	11	38.16	6	38.16	3	38.16	2	38.16	4	38.16	8	38.16	9	38.16	6	38.16	5
38.18	156.75	38.18	6	38.18	9	38.18	4	38.18	8	38.18	11	38.18	9	38.18	4	38.18	9	38.18	4
38.2	162	38.2	2	38.2	5	38.2	5	38.2	7	38.2	10	38.2	2	38.2	6	38.2	5	38.2	8
38.22	159	38.22	6	38.22	4	38.22	9	38.22	1	38.22	7	38.22	5	38.22	9	38.22	4	38.22	4
38.24	159.75	38.24	7	38.24	9	38.24	4	38.24	6	38.24	7	38.24	8	38.24	9	38.24	9	38.24	5
38.26	159.75	38.26	7	38.26	4	38.26	7	38.26	6	38.26	7	38.26	3	38.26	5	38.26	4	38.26	4
38.28	160.5	38.28	4	38.28	6	38.28	6	38.28	11	38.28	6	38.28	5	38.28	5	38.28	6	38.28	4
38.3	158.25	38.3	5	38.3	4	38.3	2	38.3	8	38.3	6	38.3	4	38.3	6	38.3	4	38.3	7
38.32	159	38.32	11	38.32	9	38.32	4	38.32	7	38.32	10	38.32	7	38.32	5	38.32	9	38.32	5
38.34	161.25	38.34	5	38.34	9	38.34	7	38.34	5	38.34	10	38.34	3	38.34	10	38.34	9	38.34	6
38.36	160.5	38.36	6	38.36	3	38.36	1	38.36	4	38.36	9	38.36	2	38.36	3	38.36	3	38.36	4
38.38	156	38.38	3	38.38	5	38.38	4	38.38	6	38.38	9	38.38	2	38.38	4	38.38	5	38.38	7
38.4	158.25	38.4	5	38.4	4	38.4	4	38.4	6	38.4	2	38.4	4	38.4	8	38.4	4	38.4	4
38.42	163.5	38.42	5	38.42	6	38.42	6	38.42	5	38.42	5	38.42	5	38.42	3	38.42	6	38.42	5
38.44	160.5	38.44	3	38.44	11	38.44	5	38.44	12	38.44	10	38.44	4	38.44	5	38.44	11	38.44	5
38.46	159	38.46	6	38.46	6	38.46	3	38.46	5	38.46	10	38.46	8	38.46	8	38.46	6	38.46	8
38.48	156.75	38.48	5	38.48	8	38.48	9	38.48	3	38.48	5	38.48	5	38.48	4	38.48	8	38.48	10
38.5	160.5	38.5	2	38.5	3	38.5	4	38.5	5	38.5	8	38.5	4	38.5	3	38.5	3	38.5	7
38.52	157.5	38.52	13	38.52	5	38.52	5	38.52	7	38.52	8	38.52	5	38.52	6	38.52	5	38.52	1
38.54	153.75	38.54	5	38.54	6	38.54	6	38.54	10	38.54	5	38.54	5	38.54	9	38.54	6	38.54	5
38.56	157.5	38.56	8	38.56	5	38.56	6	38.56	4	38.56	6	38.56	3	38.56	7	38.56	5	38.56	4
38.58	162.75	38.58	8	38.58	6	38.58	7	38.58	6	38.58	11	38.58	2	38.58	3	38.58	6	38.58	5
38.6	162	38.6	5	38.6	6	38.6	2	38.6	9	38.6	8	38.6	7	38.6	10	38.6	6	38.6	5
38.62	162	38.62	6	38.62	10	38.62	7	38.62	6	38.62	9	38.62	6	38.62	4	38.62	10	38.62	5
38.64	162	38.64	5	38.64	6	38.64	10	38.64	8	38.64	7	38.64	5	38.64	3	38.64	6	38.64	9
38.66	158.25	38.66	7	38.66	4	38.66	8	38.66	5	38.66	8	38.66	9	38.66	10	38.66	4	38.66	3
38.68	158.25	38.68	8	38.68	11	38.68	9	38.68	5	38.68	10	38.68	6	38.68	6	38.68	11	38.68	11
38.7	160.5	38.7	4	38.7	8	38.7	7	38.7	6	38.7	6	38.7	10	38.7	6	38.7	8	38.7	4
38.72	159	38.72	5	38.72	5	38.72	4	38.72	9	38.72	13	38.72	7	38.72	11	38.72	5	38.72	5
38.74	162.75	38.74	5	38.74	12	38.74	3	38.74	8	38.74	11	38.74	12	38.74	10	38.74	12	38.74	7
38.76	159	38.76	9	38.76	6	38.76	7	38.76	6	38.76	7	38.76	4	38.76	5	38.76	6	38.76	9
38.78	158.25	38.78	5	38.78	7	38.78	4	38.78	9	38.78	5	38.78	6	38.78	6	38.78	7	38.78	3
38.8	158.25	38.8	5	38.8	5	38.8	8	38.8	15	38.8	7	38.8	5	38.8	6	38.8	5	38.8	10
38.82	160.5	38.82	5	38.82	5	38.82	7	38.82	8	38.82	13	38.82	6	38.82	4	38.82	5	38.82	5
38.84	157.5	38.84	5	38.84	8	38.84	5	38.84	7	38.84	8	38.84	8	38.84	5	38.84	8	38.84	5
38.86	153.75	38.86	3	38.86	9	38.86	7	38.86	8	38.86	11	38.86	13	38.86	10	38.86	9	38.86	7
38.88	159.75	38.88	4	38.88	4	38.88	4	38.88	6	38.88	8	38.88	8	38.88	6	38.88	4	38.88	8
38.9	158.25	38.9	7	38.9	5	38.9	9	38.9	9	38.9	9	38.9	12	38.9	5	38.9	5	38.9	3
38.92	156.75	38.92	6	38.92	4	38.92	7	38.92	7	38.92	10	38.92	7	38.92	8	38.92	4	38.92	5
38.94	161.25	38.94	7	38.94	8	38.94	6	38.94	5	38.94	6	38.94	2	38.94	9	38.94	8	38.94	6
38.96	156	38.96	8	38.96	5	38.96	5	38.96	12	38.96	7	38.96	6	38.96	5	38.96	5	38.96	5
38.98	153.75	38.98	8	38.98	3	38.98	8	38.98	6	38.98	6	38.98	5	38.98	5	38.98	3	38.98	3
39	156.75	39	1	39	4	39	8	39	5	39	10	39	0	39	6	39	4	39	6
39.02	155.25	39.02	4	39.02	8	39.02	4	39.02	6	39.02	6	39.02	8	39.02	9	39.02	8	39.02	3
39.04	156	39.04	2	39.04	8	39.04	9	39.04	7	39.04	3	39.04	4	39.04	3	39.04	8	39.04	8
39.06	159	39.06	6	39.06	9	39.06	7	39.06	7	39.06	5	39.06	4	39.06	6	39.06	9	39.06	7
39.08	159	39.08	5	39.08	8	39.08	7	39.08	10	39.08	8	39.08	8	39.08	2	39.08	8	39.08	1
39.1	156	39.1	6	39.1	6	39.1	3	39.1	6	39.1	7	39.1	5	39.1	3	39.1	6	39.1	10
39.12	155.25	39.12	4	39.12	3	39.12	6	39.12	2	39.12	7	39.12	3	39.12	10	39.12	3	39.12	4
39.14	160.5	39.14	3	39.14	3	39.14	5	39.14	5	39.14	7	39.14	3	39.14	5	39.14	3	39.14	7
39.16	157.5	39.16	11	39.16	3	39.16	5	39.16	6	39.16	4	39.16	7	39.16	2	39.16	3	39.16	4
39.18	156.75	39.18	2	39.18	9	39.18	5	39.18	12	39.18	10	39.18	7	39.18	8	39.18	9	39.18	8
39.2	160.5	39.2	5	39.2	5	39.2	9	39.2	4	39.2	7	39.2	5	39.2	10	39.2	5	39.2	3
39.22	161.25	39.22	9	39.22	4	39.22	4	39.22	3	39.22	5	39.22	3	39.22	3	39.22	4	39.22	7
39.24	153.75	39.24	5	39.24	4	39.24	8	39.24	5	39.24	9	39.24	4	39.24	8	39.24	4	39.24	7
39.26	159.75	39.26	5	39.26	4	39.26	2	39.26	5	39.26	8	39.26	6	39.26	5	39.26	4	39.26	2
39.28	155.25	39.28	6	39.28	4	39.28	5	39.28	11	39.28	6	39.28	2	39.28	6	39.28	4	39.28	2
39.3	156.75	39.3	5	39.3	4	39.3	2	39.3	12	39.3	4	39.3	7	39.3	3	39.3	4	39.3	4
39.32	150.75	39.32	4	39.32	4	39.32	3	39.32	8	39.32	2	39.32	6	39.32	3	39.32	4	39.32	5
39.34	156	39.34	4	39.34	9	39.34	2	39.34	3	39.34	8	39.34	5	39.34	10	39.34	9	39.34	2
39.36	155.25	39.36	1	39.36	5	39.36	5	39.36	6	39.36	9	39.36	8	39.36	8	39.36	5	39.36	11
39.38	153	39.38	6	39.38	6	39.38	2	39.38	4	39.38	9	39.38	6	39.38	6	39.38	6	39.38	4
39.4	159	39.4	8	39.4	9	39.4	1	39.4	2	39.4	1	39.4	5	39.4	7	39.4	9	39.4	1
39.42	156	39.42	3	39.42	7	39.42	6	39.42	9	39.42	8	39.42	1	39.42	4	39.42	7	39.42	9
39.44	159.75	39.44	2	39.44	5	39.44	2	39.44	6	39.44	8	39.44	5	39.44	3	39.44	5	39.44	8
39.46	155.25	39.46	8	39.46	6	39.46	3	39.46	4	39.46	9	39.46	4	39.46	4	39.46	6	39.46	8
39.48	155.25	39.48	7	39.48	8	39.48	5	39.48	6	39.48	4	39.48	1	39.48	5	39.48	8	39.48	4
39.5	162.75	39.5	4	39.5	5	39.5	1	39.5	8	39.5	6	39.5	4	39.5	8	39.5	5	39.5	3
39.52	158.25	39.52	7	39.52	1	39.52	1	39.52	4	39.52	5	39.52	2	39.52	1	39.52	1	39.52	6
39.54	157.5	39.54	10	39.54	11	39.54	7	39.54	2	39.54	4	39.54	4	39.54	7	39.54	11	39.54	6
39.56	156	39.56	3	39.56	11	39.56	6	39.56	5	39.56	5	39.56	4	39.56	3	39.56	11	39.56	10
39.58	153.75	39.58	6	39.58	8	39.58	5	39.58	5	39.58	7	39.58	7	39.58	7	39.58	8	39.58	2
39.6	156	39.6	6	39.6	5	39.6	5	39.6	6	39.6	10	39.6	4	39.6	6	39.6	5	39.6	7
39.62	156	39.62	8	39.62	0	39.62	6	39.62	11	39.62	6	39.62	10	39.62	1	39.62	0	39.62	6
39.64	155.25	39.64	6	39.64	2	39.64	5	39.64	3	39.64	6	39.64	4	39.64	3	39.64	2	39.64	4
39.66	159.75	39.66	0	39.66	4	39.66	3	39.66	5	39.66	8	39.66	6	39.66	4	39.66	4	39.66	9
39.68	157.5	39.68	5	39.68	5	39.68	3	39.68	2	39.68	5	39.68	4	39.68	6	39.68	5	39.68	4
39.7	153	39.7	4	39.7	7	39.7	4	39.7	8	39.7	7	39.7	7	39.7	1	39.7	7	39.7	7
39.72	156.75	39.72	3	39.72	3	39.72	3	39.72	8	39.72	9	39.72	6	39.72	2	39.72	3	39.72	1
39.74	156.75	39.74	5	39.74	10	39.74	5	39.74	5	39.74	3	39.74	5	39.74	10	39.74	10	39.74	3
39.76	159	39.76	3	39.76	4	39.76	5	39.76	7	39.76	8	39.76	9	39.76	7	39.76	4	39.76	3
39.78	154.5	39.78	6	39.78	8	39.78	6	39.78	5	39.78	5	39.78	3	39.78	7	39.78	8	39.78	3
39.8	155.25	39.8	3	39.8	8	39.8	1	39.8	5	39.8	9	39.8	7	39.8	9	39.8	8	39.8	3
39.82	156	39.82	5	39.82	5	39.82	5	39.82	7	39.82	5	39.82	6	39.82	7	39.82	5	39.82	2
39.84	158.25	39.84	4	39.84	2	39.84	4	39.84	8	39.84	6	39.84	4	39.84	7	39.84	2	39.84	6
39.86	156.75	39.86	0	39.86	6	39.86	4	39.86	7	39.86	8	39.86	12	39.86	4	39.86	6	39.86	3
39.88	156	39.88	3	39.88	5	39.88	3	39.88	6	39.88	6	39.88	7	39.88	8	39.88	5	39.88	7
39.9	157.5	39.9	1	39.9	1	39.9	2	39.9	5	39.9	4	39.9	7	39.9	4	39.9	1	39.9	4
39.92	156	39.92	4	39.92	2	39.92	6	39.92	10	39.92	8	39.92	4	39.92	1	39.92	2	39.92	4
39.94	155.25	39.94	4	39.94	5	39.94	2	39.94	6	39.94	6	39.94	6	39.94	5	39.94	5	39.94	4
39.96	156.75	39.96	2	39.96	6	39.96	6	39.96	6	39.96	10	39.96	5	39.96	4	39.96	6	39.96	4
39.98	157.5	39.98	4	39.98	3	39.98	1	39.98	11	39.98	5	39.98	4	39.98	4	39.98	3	39.98	3
40	158.25	40	3	40	4	40	5	40	4	40	7	40	1	40	8	40	4	40	6
40.02	155.25	40.02	3	40.02	6	40.02	5	40.02	6	40.02	9	40.02	5	40.02	7	40.02	6	40.02	5
40.04	159	40.04	3	40.04	6	40.04	5	40.04	8	40.04	8	40.04	4	40.04	3	40.04	6	40.04	2
40.06	153.75	40.06	4	40.06	5	40.06	4	40.06	2	40.06	4	40.06	13	40.06	5	40.06	5	40.06	3
40.08	155.25	40.08	7	40.08	4	40.08	4	40.08	6	40.08	3	40.08	5	40.08	3	40.08	4	40.08	2
40.1	154.5	40.1	5	40.1	7	40.1	5	40.1	8	40.1	7	40.1	3	40.1	2	40.1	7	40.1	2
40.12	156.75	40.12	4	40.12	6	40.12	5	40.12	2	40.12	1	40.12	5	40.12	5	40.12	6	40.12	6
40.14	156	40.14	2	40.14	3	40.14	10	40.14	11	40.14	4	40.14	0	40.14	4	40.14	3	40.14	6
40.16	158.25	40.16	6	40.16	4	40.16	4	40.16	4	40.16	4	40.16	0	40.16	5	40.16	4	40.16	4
40.18	159.75	40.18	6	40.18	2	40.18	3	40.18	4	40.18	7	40.18	3	40.18	5	40.18	2	40.18	7
40.2	156.75	40.2	1	40.2	2	40.2	8	40.2	6	40.2	7	40.2	3	40.2	4	40.2	2	40.2	4
40.22	153	40.22	2	40.22	11	40.22	7	40.22	9	40.22	5	40.22	11	40.22	4	40.22	11	40.22	2
40.24	154.5	40.24	3	40.24	3	40.24	2	40.24	10	40.24	8	40.24	7	40.24	10	40.24	3	40.24	8
40.26	162.75	40.26	7	40.26	4	40.26	5	40.26	8	40.26	4	40.26	5	40.26	6	40.26	4	40.26	7
40.28	158.25	40.28	7	40.28	6	40.28	3	40.28	4	40.28	7	40.28	7	40.28	4	40.28	6	40.28	4
40.3	155.25	40.3	3	40.3	2	40.3	7	40.3	6	40.3	4	40.3	6	40.3	1	40.3	2	40.3	1
40.32	156.75	40.32	8	40.32	6	40.32	8	40.32	3	40.32	7	40.32	4	40.32	4	40.32	6	40.32	3
40.34	162	40.34	5	40.34	9	40.34	6	40.34	5	40.34	2	40.34	1	40.34	3	40.34	9	40.34	4
40.36	165	40.36	3	40.36	6	40.36	6	40.36	10	40.36	10	40.36	7	40.36	4	40.36	6	40.36	2
40.38	156	40.38	5	40.38	8	40.38	4	40.38	2	40.38	6	40.38	7	40.38	3	40.38	8	40.38	2
40.4	156.75	40.4	7	40.4	4	40.4	3	40.4	6	40.4	2	40.4	7	40.4	3	40.4	4	40.4	8
40.42	155.25	40.42	1	40.42	5	40.42	3	40.42	6	40.42	7	40.42	2	40.42	8	40.42	5	40.42	5
40.44	161.25	40.44	5	40.44	7	40.44	4	40.44	4	40.44	5	40.44	9	40.44	7	40.44	7	40.44	5
40.46	158.25	40.46	6	40.46	7	40.46	3	40.46	2	40.46	11	40.46	6	40.46	3	40.46	7	40.46	7
40.48	159	40.48	3	40.48	5	40.48	6	40.48	1	40.48	6	40.48	8	40.48	8	40.48	5	40.48	6
40.5	157.5	40.5	4	40.5	9	40.5	5	40.5	10	40.5	4	40.5	3	40.5	5	40.5	9	40.5	4
40.52	156	40.52	9	40.52	8	40.52	5	40.52	9	40.52	10	40.52	6	40.52	6	40.52	8	40.52	9
40.54	159.75	40.54	6	40.54	10	40.54	5	40.54	8	40.54	7	40.54	5	40.54	4	40.54	10	40.54	3
40.56	159.75	40.56	9	40.56	5	40.56	2	40.56	12	40.56	8	40.56	4	40.56	5	40.56	5	40.56	3
40.58	155.25	40.58	2	40.58	5	40.58	7	40.58	1	40.58	9	40.58	8	40.58	7	40.58	5	40.58	6
40.6	158.25	40.6	7	40.6	10	40.6	5	40.6	4	40.6	7	40.6	10	40.6	2	40.6	10	40.6	7
40.62	159	40.62	5	40.62	6	40.62	5	40.62	8	40.62	7	40.62	1	40.62	6	40.62	6	40.62	7
40.64	157.5	40.64	2	40.64	8	40.64	2	40.64	7	40.64	9	40.64	11	40.64	8	40.64	8	40.64	6
40.66	157.5	40.66	7	40.66	5	40.66	9	40.66	4	40.66	3	40.66	9	40.66	3	40.66	5	40.66	4
40.68	155.25	40.68	7	40.68	10	40.68	0	40.68	7	40.68	5	40.68	3	40.68	6	40.68	10	40.68	8
40.7	156.75	40.7	5	40.7	2	40.7	4	40.7	6	40.7	4	40.7	10	40.7	12	40.7	2	40.7	11
40.72	160.5	40.72	6	40.72	9	40.72	4	40.72	5	40.72	9	40.72	4	40.72	3	40.72	9	40.72	5
40.74	159	40.74	10	40.74	5	40.74	9	40.74	5	40.74	6	40.74	7	40.74	5	40.74	5	40.74	4
40.76	152.25	40.76	8	40.76	7	40.76	5	40.76	8	40.76	4	40.76	4	40.76	7	40.76	7	40.76	3
40.78	159	40.78	5	40.78	5	40.78	5	40.78	4	40.78	7	40.78	9	40.78	6	40.78	5	40.78	0
40.8	156.75	40.8	3	40.8	5	40.8	1	40.8	4	40.8	6	40.8	6	40.8	6	40.8	5	40.8	6
40.82	156	40.82	5	40.82	6	40.82	6	40.82	3	40.82	8	40.82	3	40.82	7	40.82	6	40.82	4
40.84	154.5	40.84	5	40.84	7	40.84	5	40.84	10	40.84	8	40.84	8	40.84	12	40.84	7	40.84	4
40.86	159.75	40.86	8	40.86	6	40.86	4	40.86	10	40.86	5	40.86	11	40.86	8	40.86	6	40.86	8
40.88	161.25	40.88	5	40.88	1	40.88	8	40.88	4	40.88	6	40.88	9	40.88	4	40.88	1	40.88	8
40.9	159.75	40.9	11	40.9	5	40.9	6	40.9	9	40.9	5	40.9	6	40.9	7	40.9	5	40.9	5
40.92	162.75	40.92	5	40.92	10	40.92	6	40.92	3	40.92	6	40.92	3	40.92	7	40.92	10	40.92	10
40.94	156	40.94	6	40.94	9	40.94	6	40.94	8	40.94	9	40.94	4	40.94	7	40.94	9	40.94	6
40.96	160.5	40.96	5	40.96	7	40.96	7	40.96	9	40.96	6	40.96	8	40.96	8	40.96	7	40.96	7
40.98	163.5	40.98	5	40.98	9	40.98	6	40.98	5	40.98	9	40.98	6	40.98	3	40.98	9	40.98	6
41	163.5	41	11	41	8	41	8	41	8	41	13	41	8	41	3	41	8	41	8
41.02	163.5	41.02	4	41.02	3	41.02	9	41.02	6	41.02	6	41.02	7	41.02	8	41.02	3	41.02	4
41.04	156.75	41.04	9	41.04	8	41.04	7	41.04	9	41.04	2	41.04	13	41.04	7	41.04	8	41.04	9
41.06	157.5	41.06	12	41.06	11	41.06	6	41.06	14	41.06	12	41.06	7	41.06	6	41.06	11	41.06	9
41.08	160.5	41.08	1	41.08	10	41.08	4	41.08	7	41.08	6	41.08	8	41.08	6	41.08	10	41.08	7
41.1	159.75	41.1	7	41.1	10	41.1	4	41.1	7	41.1	9	41.1	4	41.1	6	41.1	10	41.1	7
41.12	162	41.12	3	41.12	8	41.12	5	41.12	8	41.12	3	41.12	0	41.12	9	41.12	8	41.12	8
41.14	157.5	41.14	5	41.14	6	41.14	4	41.14	5	41.14	7	41.14	8	41.14	3	41.14	6	41.14	4
41.16	156	41.16	8	41.16	8	41.16	3	41.16	8	41.16	3	41.16	10	41.16	7	41.16	8	41.16	3
41.18	155.25	41.18	9	41.18	5	41.18	6	41.18	5	41.18	7	41.18	10	41.18	9	41.18	5	41.18	2
41.2	156	41.2	3	41.2	3	41.2	7	41.2	3	41.2	8	41.2	1	41.2	8	41.2	3	41.2	8
41.22	156	41.22	4	41.22	15	41.22	4	41.22	7	41.22	5	41.22	6	41.22	4	41.22	15	41.22	6
41.24	159	41.24	13	41.24	7	41.24	6	41.24	9	41.24	9	41.24	6	41.24	7	41.24	7	41.24	12
41.26	157.5	41.26	6	41.26	5	41.26	6	41.26	5	41.26	5	41.26	7	41.26	7	41.26	5	41.26	2
41.28	161.25	41.28	9	41.28	7	41.28	1	41.28	3	41.28	8	41.28	4	41.28	3	41.28	7	41.28	5
41.3	162.75	41.3	6	41.3	9	41.3	6	41.3	1	41.3	5	41.3	4	41.3	8	41.3	9	41.3	2
41.32	162	41.32	7	41.32	12	41.32	5	41.32	8	41.32	4	41.32	4	41.32	9	41.32	12	41.32	5
41.34	159	41.34	6	41.34	7	41.34	8	41.34	3	41.34	7	41.34	6	41.34	3	41.34	7	41.34	10
41.36	156.75	41.36	6	41.36	6	41.36	5	41.36	7	41.36	10	41.36	7	41.36	11	41.36	6	41.36	4
41.38	159.75	41.38	6	41.38	7	41.38	4	41.38	4	41.38	2	41.38	3	41.38	17	41.38	7	41.38	10
41.4	159	41.4	7	41.4	6	41.4	6	41.4	4	41.4	6	41.4	9	41.4	9	41.4	6	41.4	7
41.42	159.75	41.42	6	41.42	8	41.42	5	41.42	9	41.42	11	41.42	4	41.42	2	41.42	8	41.42	1
41.44	161.25	41.44	8	41.44	11	41.44	6	41.44	10	41.44	10	41.44	3	41.44	5	41.44	11	41.44	8
41.46	164.25	41.46	8	41.46	7	41.46	2	41.46	10	41.46	5	41.46	5	41.46	7	41.46	7	41.46	15
41.48	163.5	41.48	12	41.48	11	41.48	5	41.48	5	41.48	1	41.48	4	41.48	6	41.48	11	41.48	4
41.5	160.5	41.5	7	41.5	3	41.5	8	41.5	9	41.5	9	41.5	7	41.5	4	41.5	3	41.5	11
41.52	160.5	41.52	5	41.52	7	41.52	7	41.52	6	41.52	9	41.52	8	41.52	12	41.52	7	41.52	6
41.54	159	41.54	4	41.54	7	41.54	3	41.54	11	41.54	9	41.54	7	41.54	11	41.54	7	41.54	7
41.56	160.5	41.56	10	41.56	4	41.56	2	41.56	7	41.56	9	41.56	4	41.56	4	41.56	4	41.56	2
41.58	156.75	41.58	5	41.58	15	41.58	6	41.58	4	41.58	8	41.58	5	41.58	6	41.58	15	41.58	4
41.6	160.5	41.6	4	41.6	8	41.6	5	41.6	4	41.6	7	41.6	8	41.6	10	41.6	8	41.6	8
41.62	157.5	41.62	6	41.62	4	41.62	4	41.62	8	41.62	6	41.62	3	41.62	9	41.62	4	41.62	10
41.64	155.25	41.64	7	41.64	7	41.64	3	41.64	6	41.64	8	41.64	8	41.64	7	41.64	7	41.64	7
41.66	157.5	41.66	7	41.66	8	41.66	7	41.66	12	41.66	8	41.66	5	41.66	3	41.66	8	41.66	2
41.68	155.25	41.68	5	41.68	4	41.68	4	41.68	4	41.68	11	41.68	5	41.68	5	41.68	4	41.68	3
41.7	159.75	41.7	5	41.7	12	41.7	9	41.7	10	41.7	5	41.7	12	41.7	8	41.7	12	41.7	6
41.72	158.25	41.72	11	41.72	7	41.72	6	41.72	3	41.72	12	41.72	7	41.72	5	41.72	7	41.72	6
41.74	158.25	41.74	9	41.74	6	41.74	7	41.74	5	41.74	6	41.74	8	41.74	5	41.74	6	41.74	3
41.76	155.25	41.76	7	41.76	8	41.76	9	41.76	5	41.76	8	41.76	8	41.76	2	41.76	8	41.76	9
41.78	153.75	41.78	6	41.78	8	41.78	5	41.78	5	41.78	10	41.78	8	41.78	6	41.78	8	41.78	6
41.8	158.25	41.8	3	41.8	7	41.8	7	41.8	4	41.8	5	41.8	4	41.8	5	41.8	7	41.8	2
41.82	157.5	41.82	4	41.82	7	41.82	7	41.82	9	41.82	3	41.82	3	41.82	7	41.82	7	41.82	1
41.84	159	41.84	6	41.84	8	41.84	3	41.84	3	41.84	4	41.84	3	41.84	3	41.84	8	41.84	7
41.86	152.25	41.86	2	41.86	6	41.86	3	41.86	5	41.86	6	41.86	2	41.86	6	41.86	6	41.86	8
41.88	153.75	41.88	4	41.88	7	41.88	3	41.88	5	41.88	7	41.88	3	41.88	10	41.88	7	41.88	6
41.9	154.5	41.9	6	41.9	5	41.9	1	41.9	6	41.9	4	41.9	8	41.9	7	41.9	5	41.9	6
41.92	156.75	41.92	7	41.92	3	41.92	8	41.92	2	41.92	7	41.92	7	41.92	3	41.92	3	41.92	4
41.94	157.5	41.94	2	41.94	5	41.94	5	41.94	3	41.94	9	41.94	7	41.94	9	41.94	5	41.94	3
41.96	154.5	41.96	7	41.96	6	41.96	1	41.96	6	41.96	6	41.96	7	41.96	5	41.96	6	41.96	9
41.98	157.5	41.98	9	41.98	6	41.98	9	41.98	5	41.98	8	41.98	7	41.98	5	41.98	6	41.98	5
42	153	42	5	42	6	42	4	42	10	42	2	42	8	42	4	42	6	42	6
42.02	155.25	42.02	5	42.02	6	42.02	4	42.02	9	42.02	7	42.02	5	42.02	5	42.02	6	42.02	4
42.04	156.75	42.04	7	42.04	3	42.04	3	42.04	3	42.04	6	42.04	6	42.04	5	42.04	3	42.04	5
42.06	155.25	42.06	1	42.06	4	42.06	5	42.06	3	42.06	4	42.06	4	42.06	4	42.06	4	42.06	6
42.08	159	42.08	2	42.08	4	42.08	3	42.08	5	42.08	7	42.08	5	42.08	7	42.08	4	42.08	3
42.1	158.25	42.1	5	42.1	5	42.1	4	42.1	4	42.1	4	42.1	4	42.1	6	42.1	5	42.1	3
42.12	158.25	42.12	7	42.12	5	42.12	2	42.12	5	42.12	4	42.12	6	42.12	6	42.12	5	42.12	4
42.14	156.75	42.14	4	42.14	4	42.14	2	42.14	6	42.14	6	42.14	3	42.14	5	42.14	4	42.14	2
42.16	155.25	42.16	4	42.16	8	42.16	8	42.16	9	42.16	3	42.16	6	42.16	2	42.16	8	42.16	4
42.18	152.25	42.18	5	42.18	5	42.18	4	42.18	7	42.18	6	42.18	5	42.18	3	42.18	5	42.18	6
42.2	156.75	42.2	3	42.2	3	42.2	4	42.2	3	42.2	1	42.2	6	42.2	7	42.2	3	42.2	8
42.22	156	42.22	6	42.22	5	42.22	3	42.22	4	42.22	3	42.22	8	42.22	5	42.22	5	42.22	6
42.24	159	42.24	1	42.24	3	42.24	4	42.24	1	42.24	6	42.24	6	42.24	3	42.24	3	42.24	6
42.26	153.75	42.26	0	42.26	7	42.26	7	42.26	6	42.26	7	42.26	6	42.26	6	42.26	7	42.26	8
42.28	159	42.28	6	42.28	4	42.28	5	42.28	6	42.28	6	42.28	8	42.28	4	42.28	4	42.28	5
42.3	158.25	42.3	4	42.3	4	42.3	1	42.3	7	42.3	5	42.3	2	42.3	3	42.3	4	42.3	12
42.32	161.25	42.32	7	42.32	3	42.32	5	42.32	3	42.32	6	42.32	5	42.32	6	42.32	3	42.32	8
42.34	162.75	42.34	2	42.34	3	42.34	7	42.34	7	42.34	5	42.34	7	42.34	6	42.34	3	42.34	5
42.36	159	42.36	3	42.36	7	42.36	4	42.36	8	42.36	5	42.36	6	42.36	6	42.36	7	42.36	6
42.38	157.5	42.38	9	42.38	1	42.38	8	42.38	3	42.38	6	42.38	6	42.38	4	42.38	1	42.38	8
42.4	156	42.4	4	42.4	3	42.4	6	42.4	3	42.4	4	42.4	9	42.4	7	42.4	3	42.4	1
42.42	159.75	42.42	4	42.42	10	42.42	2	42.42	3	42.42	3	42.42	2	42.42	5	42.42	10	42.42	4
42.44	154.5	42.44	2	42.44	4	42.44	5	42.44	3	42.44	4	42.44	4	42.44	4	42.44	4	42.44	2
42.46	156	42.46	8	42.46	4	42.46	6	42.46	11	42.46	12	42.46	5	42.46	6	42.46	4	42.46	7
42.48	159	42.48	4	42.48	8	42.48	5	42.48	6	42.48	4	42.48	2	42.48	11	42.48	8	42.48	8
42.5	159	42.5	3	42.5	1	42.5	4	42.5	3	42.5	1	42.5	4	42.5	6	42.5	1	42.5	2
42.52	157.5	42.52	5	42.52	1	42.52	3	42.52	6	42.52	3	42.52	6	42.52	4	42.52	1	42.52	9
42.54	156.75	42.54	7	42.54	3	42.54	4	42.54	5	42.54	6	42.54	3	42.54	5	42.54	3	42.54	2
42.56	155.25	42.56	3	42.56	8	42.56	7	42.56	9	42.56	12	42.56	6	42.56	5	42.56	8	42.56	5
42.58	155.25	42.58	5	42.58	5	42.58	5	42.58	4	42.58	5	42.58	7	42.58	5	42.58	5	42.58	5
42.6	154.5	42.6	7	42.6	9	42.6	6	42.6	3	42.6	6	42.6	7	42.6	7	42.6	9	42.6	7
42.62	155.25	42.62	4	42.62	8	42.62	6	42.62	5	42.62	5	42.62	4	42.62	7	42.62	8	42.62	6
42.64	159	42.64	2	42.64	3	42.64	4	42.64	8	42.64	4	42.64	7	42.64	4	42.64	3	42.64	9
42.66	154.5	42.66	6	42.66	6	42.66	12	42.66	7	42.66	11	42.66	8	42.66	6	42.66	6	42.66	5
42.68	158.25	42.68	9	42.68	5	42.68	3	42.68	6	42.68	8	42.68	5	42.68	6	42.68	5	42.68	9
42.7	156	42.7	4	42.7	4	42.7	8	42.7	4	42.7	7	42.7	6	42.7	6	42.7	4	42.7	4
42.72	160.5	42.72	3	42.72	0	42.72	6	42.72	4	42.72	1	42.72	5	42.72	7	42.72	0	42.72	9
42.74	154.5	42.74	5	42.74	11	42.74	7	42.74	10	42.74	3	42.74	5	42.74	3	42.74	11	42.74	5
42.76	154.5	42.76	7	42.76	3	42.76	5	42.76	5	42.76	6	42.76	5	42.76	7	42.76	3	42.76	6
42.78	158.25	42.78	4	42.78	6	42.78	9	42.78	9	42.78	4	42.78	8	42.78	6	42.78	6	42.78	8
42.8	159	42.8	4	42.8	7	42.8	8	42.8	8	42.8	7	42.8	2	42.8	5	42.8	7	42.8	12
42.82	154.5	42.82	3	42.82	6	42.82	5	42.82	10	42.82	12	42.82	6	42.82	8	42.82	6	42.82	3
42.84	159	42.84	8	42.84	3	42.84	4	42.84	8	42.84	3	42.84	7	42.84	8	42.84	3	42.84	7
42.86	156	42.86	8	42.86	4	42.86	7	42.86	8	42.86	6	42.86	10	42.86	6	42.86	4	42.86	9
42.88	156.75	42.88	6	42.88	12	42.88	3	42.88	5	42.88	7	42.88	6	42.88	3	42.88	12	42.88	2
42.9	159	42.9	6	42.9	6	42.9	6	42.9	8	42.9	3	42.9	5	42.9	6	42.9	6	42.9	0
42.92	157.5	42.92	4	42.92	5	42.92	3	42.92	8	42.92	6	42.92	3	42.92	6	42.92	5	42.92	7
42.94	156	42.94	5	42.94	4	42.94	11	42.94	8	42.94	4	42.94	10	42.94	5	42.94	4	42.94	3
42.96	157.5	42.96	13	42.96	9	42.96	5	42.96	14	42.96	11	42.96	3	42.96	4	42.96	9	42.96	6
42.98	162.75	42.98	9	42.98	7	42.98	4	42.98	9	42.98	8	42.98	5	42.98	8	42.98	7	42.98	6
43	158.25	43	5	43	9	43	1	43	6	43	9	43	3	43	3	43	9	43	5
43.02	154.5	43.02	5	43.02	4	43.02	1	43.02	4	43.02	12	43.02	7	43.02	6	43.02	4	43.02	9
43.04	163.5	43.04	9	43.04	5	43.04	8	43.04	5	43.04	5	43.04	5	43.04	9	43.04	5	43.04	3
43.06	157.5	43.06	10	43.06	7	43.06	5	43.06	11	43.06	6	43.06	2	43.06	6	43.06	7	43.06	4
43.08	155.25	43.08	4	43.08	8	43.08	3	43.08	7	43.08	8	43.08	3	43.08	9	43.08	8	43.08	7
43.1	159.75	43.1	3	43.1	6	43.1	3	43.1	4	43.1	8	43.1	5	43.1	8	43.1	6	43.1	7
43.12	165	43.12	6	43.12	8	43.12	5	43.12	8	43.12	8	43.12	8	43.12	7	43.12	8	43.12	6
43.14	162.75	43.14	11	43.14	5	43.14	3	43.14	11	43.14	7	43.14	6	43.14	8	43.14	5	43.14	5
43.16	156.75	43.16	6	43.16	7	43.16	3	43.16	16	43.16	4	43.16	10	43.16	9	43.16	7	43.16	7
43.18	156.75	43.18	5	43.18	7	43.18	6	43.18	4	43.18	8	43.18	9	43.18	6	43.18	7	43.18	9
43.2	156	43.2	9	43.2	8	43.2	3	43.2	10	43.2	8	43.2	7	43.2	4	43.2	8	43.2	3
43.22	155.25	43.22	5	43.22	8	43.22	4	43.22	9	43.22	4	43.22	10	43.22	12	43.22	8	43.22	5
43.24	160.5	43.24	9	43.24	4	43.24	4	43.24	6	43.24	6	43.24	9	43.24	11	43.24	4	43.24	4
43.26	157.5	43.26	6	43.26	9	43.26	5	43.26	4	43.26	9	43.26	8	43.26	7	43.26	9	43.26	5
43.28	162	43.28	6	43.28	9	43.28	6	43.28	7	43.28	9	43.28	3	43.28	6	43.28	9	43.28	4
43.3	162.75	43.3	9	43.3	2	43.3	7	43.3	5	43.3	12	43.3	6	43.3	10	43.3	2	43.3	6
43.32	158.25	43.32	9	43.32	10	43.32	10	43.32	10	43.32	8	43.32	6	43.32	7	43.32	10	43.32	6
43.34	161.25	43.34	3	43.34	3	43.34	7	43.34	3	43.34	7	43.34	8	43.34	9	43.34	3	43.34	8
43.36	155.25	43.36	5	43.36	2	43.36	8	43.36	6	43.36	7	43.36	4	43.36	6	43.36	2	43.36	2
43.38	162.75	43.38	3	43.38	8	43.38	4	43.38	10	43.38	11	43.38	5	43.38	4	43.38	8	43.38	2
43.4	161.25	43.4	7	43.4	10	43.4	8	43.4	7	43.4	1	43.4	5	43.4	5	43.4	10	43.4	9
43.42	157.5	43.42	4	43.42	4	43.42	6	43.42	10	43.42	4	43.42	7	43.42	4	43.42	4	43.42	4
43.44	161.25	43.44	4	43.44	5	43.44	9	43.44	4	43.44	6	43.44	8	43.44	8	43.44	5	43.44	8
43.46	159.75	43.46	2	43.46	4	43.46	9	43.46	11	43.46	5	43.46	2	43.46	5	43.46	4	43.46	7
43.48	160.5	43.48	10	43.48	4	43.48	6	43.48	8	43.48	7	43.48	7	43.48	8	43.48	4	43.48	9
43.5	157.5	43.5	6	43.5	6	43.5	7	43.5	10	43.5	5	43.5	8	43.5	7	43.5	6	43.5	7
43.52	162	43.52	7	43.52	8	43.52	7	43.52	10	43.52	8	43.52	4	43.52	5	43.52	8	43.52	5
43.54	157.5	43.54	7	43.54	9	43.54	7	43.54	10	43.54	12	43.54	2	43.54	4	43.54	9	43.54	7
43.56	162.75	43.56	6	43.56	8	43.56	4	43.56	11	43.56	3	43.56	7	43.56	7	43.56	8	43.56	7
43.58	161.25	43.58	7	43.58	7	43.58	8	43.58	11	43.58	11	43.58	9	43.58	9	43.58	7	43.58	7
43.6	160.5	43.6	4	43.6	11	43.6	4	43.6	5	43.6	7	43.6	6	43.6	9	43.6	11	43.6	14
43.62	159.75	43.62	8	43.62	11	43.62	1	43.62	11	43.62	10	43.62	5	43.62	7	43.62	11	43.62	9
43.64	161.25	43.64	5	43.64	9	43.64	6	43.64	13	43.64	11	43.64	6	43.64	8	43.64	9	43.64	12
43.66	156	43.66	8	43.66	4	43.66	6	43.66	9	43.66	8	43.66	6	43.66	8	43.66	4	43.66	6
43.68	159	43.68	6	43.68	6	43.68	6	43.68	9	43.68	8	43.68	9	43.68	10	43.68	6	43.68	7
43.7	158.25	43.7	6	43.7	9	43.7	6	43.7	10	43.7	11	43.7	6	43.7	5	43.7	9	43.7	8
43.72	162.75	43.72	6	43.72	8	43.72	4	43.72	13	43.72	4	43.72	5	43.72	8	43.72	8	43.72	6
43.74	161.25	43.74	4	43.74	9	43.74	8	43.74	11	43.74	9	43.74	12	43.74	2	43.74	9	43.74	6
43.76	156	43.76	4	43.76	9	43.76	5	43.76	9	43.76	5	43.76	8	43.76	10	43.76	9	43.76	4
43.78	164.25	43.78	5	43.78	7	43.78	7	43.78	10	43.78	6	43.78	4	43.78	9	43.78	7	43.78	9
43.8	156	43.8	4	43.8	8	43.8	4	43.8	10	43.8	13	43.8	7	43.8	6	43.8	8	43.8	6
43.82	156.75	43.82	11	43.82	7	43.82	7	43.82	6	43.82	9	43.82	6	43.82	5	43.82	7	43.82	5
43.84	156.75	43.84	7	43.84	7	43.84	4	43.84	10	43.84	10	43.84	2	43.84	9	43.84	7	43.84	2
43.86	157.5	43.86	3	43.86	3	43.86	4	43.86	4	43.86	8	43.86	2	43.86	4	43.86	3	43.86	8
43.88	158.25	43.88	9	43.88	2	43.88	3	43.88	7	43.88	6	43.88	5	43.88	6	43.88	2	43.88	5
43.9	156	43.9	4	43.9	7	43.9	5	43.9	7	43.9	5	43.9	4	43.9	2	43.9	7	43.9	2
43.92	158.25	43.92	8	43.92	7	43.92	3	43.92	6	43.92	5	43.92	3	43.92	7	43.92	7	43.92	5
43.94	153.75	43.94	4	43.94	6	43.94	6	43.94	9	43.94	4	43.94	5	43.94	3	43.94	6	43.94	5
[truncated: 1,803 more rows]

## Sheet: Phase 2
CHZ-R (x)	CHZ-R (y)	SBZ-T160-D36-R (x)	SBZ-T160-D36-R (y)	SBZ-T150-D42-R (x)	SBZ-T150-D42-R (y)	SBZ-T170-D18-R (x)	SBZ-T170-D18-R (y)
2	10.89	4	36	4	39	4	50
2.04	8.25	4.02	60	4.02	47	4.02	41
2.08	6.6	4.04	45	4.04	31	4.04	42
2.12	6.93	4.06	44	4.06	50	4.06	54
2.16	7.59	4.08	42	4.08	40	4.08	51
2.2	7.59	4.1	49	4.1	50	4.1	58
2.24	4.62	4.12	47	4.12	49	4.12	55
2.28	6.6	4.14	42	4.14	36	4.14	65
2.32	7.26	4.16	57	4.16	36	4.16	41
2.36	5.61	4.18	47	4.18	47	4.18	53
2.4	5.94	4.2	61	4.2	43	4.2	49
2.44	6.6	4.22	56	4.22	39	4.22	52
2.48	5.61	4.24	51	4.24	31	4.24	48
2.52	6.93	4.26	45	4.26	42	4.26	33
2.56	4.62	4.28	48	4.28	37	4.28	50
2.6	3.63	4.3	47	4.3	42	4.3	46
2.64	3.63	4.32	49	4.32	49	4.32	54
2.68	6.27	4.34	41	4.34	39	4.34	65
2.72	3.63	4.36	46	4.36	42	4.36	64
2.76	5.94	4.38	37	4.38	42	4.38	57
2.8	5.28	4.4	43	4.4	35	4.4	61
2.84	5.61	4.42	50	4.42	48	4.42	54
2.88	5.94	4.44	46	4.44	56	4.44	63
2.92	3.63	4.46	43	4.46	38	4.46	56
2.96	5.61	4.48	56	4.48	40	4.48	62
3	3.63	4.5	55	4.5	44	4.5	82
3.04	4.29	4.52	74	4.52	54	4.52	59
3.08	4.95	4.54	53	4.54	42	4.54	67
3.12	2.97	4.56	38	4.56	61	4.56	62
3.16	4.62	4.58	57	4.58	50	4.58	64
3.2	4.29	4.6	51	4.6	45	4.6	79
3.24	3.96	4.62	62	4.62	46	4.62	61
3.28	6.27	4.64	60	4.64	58	4.64	60
3.32	4.62	4.66	61	4.66	49	4.66	71
3.36	3.63	4.68	58	4.68	41	4.68	78
3.4	4.29	4.7	70	4.7	32	4.7	77
3.44	3.3	4.72	62	4.72	54	4.72	57
3.48	3.3	4.74	57	4.74	55	4.74	73
3.52	4.29	4.76	60	4.76	64	4.76	79
3.56	1.98	4.78	54	4.78	45	4.78	63
3.6	2.97	4.8	50	4.8	61	4.8	70
3.64	5.28	4.82	67	4.82	57	4.82	73
3.68	4.29	4.84	74	4.84	62	4.84	88
3.72	3.96	4.86	72	4.86	57	4.86	68
3.76	2.31	4.88	65	4.88	57	4.88	79
3.8	4.95	4.9	74	4.9	64	4.9	70
3.84	3.96	4.92	80	4.92	67	4.92	67
3.88	2.97	4.94	77	4.94	83	4.94	84
3.92	6.27	4.96	76	4.96	67	4.96	91
3.96	3.3	4.98	75	4.98	55	4.98	73
4	2.97	5	74	5	67	5	71
4.04	2.31	5.02	72	5.02	66	5.02	86
4.08	5.61	5.04	75	5.04	67	5.04	93
4.12	4.62	5.06	80	5.06	61	5.06	95
4.16	3.63	5.08	98	5.08	65	5.08	72
4.2	5.28	5.1	81	5.1	81	5.1	84
4.24	1.98	5.12	86	5.12	83	5.12	101
4.28	4.29	5.14	92	5.14	79	5.14	77
4.32	3.63	5.16	70	5.16	100	5.16	75
4.36	3.96	5.18	72	5.18	88	5.18	80
4.4	2.64	5.2	59	5.2	71	5.2	86
4.44	5.28	5.22	88	5.22	67	5.22	82
4.48	4.62	5.24	80	5.24	87	5.24	72
4.52	2.31	5.26	75	5.26	98	5.26	80
4.56	6.6	5.28	72	5.28	83	5.28	73
4.6	3.3	5.3	67	5.3	77	5.3	89
4.64	0.66	5.32	80	5.32	88	5.32	81
4.68	3.63	5.34	75	5.34	85	5.34	75
4.72	3.63	5.36	88	5.36	85	5.36	76
4.76	0.99	5.38	73	5.38	72	5.38	94
4.8	3.3	5.4	80	5.4	76	5.4	70
4.84	3.96	5.42	73	5.42	86	5.42	71
4.88	2.97	5.44	70	5.44	81	5.44	73
4.92	3.63	5.46	78	5.46	83	5.46	69
4.96	3.96	5.48	68	5.48	74	5.48	71
5	3.96	5.5	66	5.5	81	5.5	65
5.04	2.64	5.52	54	5.52	81	5.52	53
5.08	3.96	5.54	71	5.54	77	5.54	56
5.12	5.28	5.56	84	5.56	96	5.56	71
5.16	4.29	5.58	63	5.58	87	5.58	67
5.2	2.31	5.6	79	5.6	68	5.6	64
5.24	3.96	5.62	64	5.62	76	5.62	48
5.28	2.97	5.64	65	5.64	79	5.64	52
5.32	3.63	5.66	62	5.66	85	5.66	55
5.36	2.31	5.68	58	5.68	74	5.68	48
5.4	1.65	5.7	61	5.7	79	5.7	47
5.44	1.98	5.72	65	5.72	73	5.72	49
5.48	2.31	5.74	52	5.74	71	5.74	42
5.52	3.63	5.76	62	5.76	78	5.76	56
5.56	3.63	5.78	55	5.78	56	5.78	52
5.6	2.31	5.8	50	5.8	56	5.8	42
5.64	3.96	5.82	73	5.82	63	5.82	51
5.68	2.31	5.84	55	5.84	52	5.84	37
5.72	2.64	5.86	48	5.86	70	5.86	39
5.76	2.31	5.88	52	5.88	65	5.88	46
5.8	5.28	5.9	40	5.9	57	5.9	41
5.84	1.65	5.92	44	5.92	47	5.92	42
5.88	2.64	5.94	39	5.94	60	5.94	54
5.92	4.29	5.96	51	5.96	60	5.96	48
5.96	2.97	5.98	44	5.98	57	5.98	35
6	3.63	6	49	6	45	6	38
6.04	1.98	6.02	44	6.02	44	6.02	48
6.08	2.97	6.04	35	6.04	33	6.04	36
6.12	1.65	6.06	31	6.06	35	6.06	39
6.16	3.96	6.08	43	6.08	53	6.08	44
6.2	2.31	6.1	43	6.1	37	6.1	41
6.24	2.64	6.12	39	6.12	37	6.12	34
6.28	2.31	6.14	37	6.14	41	6.14	42
6.32	1.65	6.16	38	6.16	32	6.16	53
6.36	3.63	6.18	44	6.18	40	6.18	51
6.4	2.97	6.2	44	6.2	40	6.2	46
6.44	1.32	6.22	37	6.22	39	6.22	37
6.48	3.3	6.24	39	6.24	42	6.24	45
6.52	2.64	6.26	40	6.26	33	6.26	42
6.56	4.62	6.28	43	6.28	36	6.28	37
6.6	3.63	6.3	26	6.3	40	6.3	46
6.64	3.96	6.32	53	6.32	36	6.32	41
6.68	3.3	6.34	40	6.34	38	6.34	50
6.72	2.64	6.36	38	6.36	36	6.36	44
6.76	4.62	6.38	36	6.38	47	6.38	35
6.8	1.98	6.4	31	6.4	37	6.4	45
6.84	3.96	6.42	33	6.42	41	6.42	42
6.88	4.95	6.44	41	6.44	36	6.44	53
6.92	6.27	6.46	46	6.46	40	6.46	35
6.96	4.29	6.48	41	6.48	37	6.48	46
7	4.95	6.5	35	6.5	41	6.5	43
7.04	4.29	6.52	38	6.52	33	6.52	37
7.08	5.94	6.54	32	6.54	32	6.54	29
7.12	5.94	6.56	35	6.56	37	6.56	40
7.16	8.58	6.58	35	6.58	38	6.58	42
7.2	7.59	6.6	41	6.6	33	6.6	38
7.24	11.55	6.62	45	6.62	41	6.62	34
7.28	13.2	6.64	40	6.64	33	6.64	33
7.32	14.19	6.66	36	6.66	31	6.66	44
7.36	17.49	6.68	37	6.68	34	6.68	34
7.4	12.21	6.7	29	6.7	20	6.7	36
7.44	16.17	6.72	38	6.72	32	6.72	38
7.48	24.09	6.74	44	6.74	29	6.74	48
7.52	34.32	6.76	23	6.76	32	6.76	54
7.56	38.28	6.78	43	6.78	31	6.78	31
7.6	42.9	6.8	39	6.8	43	6.8	33
7.64	56.76	6.82	45	6.82	25	6.82	40
7.68	81.51	6.84	39	6.84	27	6.84	43
7.72	93.39	6.86	35	6.86	31	6.86	39
7.76	120.78	6.88	34	6.88	31	6.88	41
7.8	172.59	6.9	36	6.9	28	6.9	42
7.84	219.12	6.92	36	6.92	47	6.92	42
7.88	345.84	6.94	35	6.94	33	6.94	39
7.92	498.3	6.96	29	6.96	26	6.96	42
7.96	521.07	6.98	27	6.98	29	6.98	45
8	272.91	7	32	7	38	7	41
8.04	137.94	7.02	39	7.02	26	7.02	38
8.08	52.8	7.04	29	7.04	28	7.04	53
8.12	23.76	7.06	40	7.06	44	7.06	33
8.16	14.85	7.08	32	7.08	35	7.08	39
8.2	12.21	7.1	28	7.1	28	7.1	39
8.24	12.21	7.12	30	7.12	34	7.12	42
8.28	11.55	7.14	36	7.14	22	7.14	49
8.32	15.51	7.16	35	7.16	32	7.16	37
8.36	16.5	7.18	29	7.18	35	7.18	48
8.4	20.46	7.2	35	7.2	37	7.2	42
8.44	21.78	7.22	35	7.22	37	7.22	41
8.48	29.37	7.24	39	7.24	32	7.24	46
8.52	39.6	7.26	43	7.26	34	7.26	54
8.56	49.83	7.28	38	7.28	47	7.28	44
8.6	58.08	7.3	35	7.3	47	7.3	49
8.64	80.52	7.32	28	7.32	35	7.32	51
8.68	120.78	7.34	38	7.34	36	7.34	44
8.72	154.11	7.36	57	7.36	38	7.36	40
8.76	228.69	7.38	36	7.38	28	7.38	41
8.8	305.58	7.4	39	7.4	47	7.4	61
8.84	278.85	7.42	51	7.42	38	7.42	54
8.88	233.97	7.44	50	7.44	44	7.44	52
8.92	224.4	7.46	42	7.46	39	7.46	53
8.96	122.1	7.48	41	7.48	37	7.48	63
9	65.01	7.5	53	7.5	42	7.5	58
9.04	84.81	7.52	50	7.52	47	7.52	67
9.08	97.02	7.54	61	7.54	33	7.54	70
9.12	95.37	7.56	42	7.56	42	7.56	70
9.16	58.74	7.58	51	7.58	45	7.58	76
9.2	28.38	7.6	42	7.6	44	7.6	76
9.24	11.88	7.62	51	7.62	49	7.62	94
9.28	7.59	7.64	55	7.64	48	7.64	105
9.32	4.29	7.66	52	7.66	46	7.66	98
9.36	3.96	7.68	65	7.68	47	7.68	104
9.4	3.63	7.7	63	7.7	57	7.7	142
9.44	1.65	7.72	73	7.72	50	7.72	186
9.48	3.96	7.74	69	7.74	62	7.74	216
9.52	3.96	7.76	63	7.76	56	7.76	257
9.56	1.65	7.78	80	7.78	59	7.78	303
9.6	1.65	7.8	83	7.8	59	7.8	328
9.64	2.64	7.82	103	7.82	56	7.82	373
9.68	6.6	7.84	101	7.84	75	7.84	427
9.72	4.62	7.86	124	7.86	70	7.86	491
9.76	6.27	7.88	125	7.88	72	7.88	524
9.8	8.25	7.9	116	7.9	76	7.9	594
9.84	5.94	7.92	131	7.92	88	7.92	698
9.88	9.24	7.94	170	7.94	99	7.94	761
9.92	6.27	7.96	203	7.96	93	7.96	781
9.96	2.64	7.98	225	7.98	100	7.98	846
10	3.96	8	270	8	124	8	960
10.04	2.31	8.02	299	8.02	156	8.02	995
10.08	3.63	8.04	404	8.04	160	8.04	1119
10.12	2.31	8.06	524	8.06	168	8.06	1139
10.16	2.64	8.08	629	8.08	188	8.08	968
10.2	2.97	8.1	750	8.1	210	8.1	819
10.24	4.62	8.12	865	8.12	194	8.12	619
10.28	5.61	8.14	1070	8.14	188	8.14	493
10.32	2.97	8.16	1191	8.16	199	8.16	354
10.36	2.64	8.18	1246	8.18	216	8.18	244
10.4	2.31	8.2	1149	8.2	227	8.2	194
10.44	2.64	8.22	932	8.22	237	8.22	185
10.48	3.96	8.24	668	8.24	263	8.24	144
10.52	2.31	8.26	467	8.26	286	8.26	169
10.56	2.31	8.28	318	8.28	340	8.28	126
10.6	3.3	8.3	228	8.3	338	8.3	140
10.64	4.95	8.32	201	8.32	337	8.32	141
10.68	3.96	8.34	152	8.34	396	8.34	115
10.72	2.97	8.36	144	8.36	504	8.36	158
10.76	5.61	8.38	143	8.38	535	8.38	121
10.8	5.28	8.4	140	8.4	557	8.4	142
10.84	4.29	8.42	139	8.42	567	8.42	143
10.88	4.95	8.44	156	8.44	581	8.44	130
10.92	8.25	8.46	122	8.46	550	8.46	154
10.96	5.61	8.48	135	8.48	536	8.48	156
11	7.92	8.5	135	8.5	416	8.5	131
11.04	9.24	8.52	122	8.52	380	8.52	144
11.08	4.62	8.54	121	8.54	324	8.54	170
11.12	3.96	8.56	125	8.56	239	8.56	151
11.16	3.63	8.58	116	8.58	165	8.58	200
11.2	3.96	8.6	153	8.6	157	8.6	198
11.24	2.97	8.62	134	8.62	130	8.62	238
11.28	3.3	8.64	146	8.64	120	8.64	297
11.32	3.96	8.66	120	8.66	99	8.66	249
11.36	5.28	8.68	136	8.68	117	8.68	272
11.4	5.28	8.7	145	8.7	104	8.7	339
11.44	4.95	8.72	151	8.72	115	8.72	322
11.48	3.3	8.74	157	8.74	108	8.74	363
11.52	2.31	8.76	163	8.76	101	8.76	406
11.56	3.3	8.78	152	8.78	88	8.78	447
11.6	5.61	8.8	166	8.8	121	8.8	488
11.64	4.62	8.82	201	8.82	120	8.82	524
11.68	4.62	8.84	216	8.84	124	8.84	542
11.72	6.27	8.86	224	8.86	138	8.86	619
11.76	5.94	8.88	269	8.88	127	8.88	672
11.8	3.96	8.9	287	8.9	131	8.9	634
11.84	9.9	8.92	361	8.92	124	8.92	695
11.88	12.54	8.94	406	8.94	120	8.94	711
11.92	10.89	8.96	457	8.96	120	8.96	669
11.96	8.58	8.98	529	8.98	148	8.98	641
12	7.92	9	612	9	129	9	575
12.04	5.94	9.02	653	9.02	128	9.02	551
12.08	4.62	9.04	738	9.04	150	9.04	527
12.12	3.63	9.06	683	9.06	178	9.06	434
12.16	3.63	9.08	676	9.08	169	9.08	358
12.2	3.96	9.1	574	9.1	185	9.1	297
12.24	4.95	9.12	599	9.12	229	9.12	271
12.28	2.64	9.14	592	9.14	224	9.14	257
12.32	2.64	9.16	509	9.16	260	9.16	250
12.36	3.3	9.18	427	9.18	233	9.18	265
12.4	4.95	9.2	313	9.2	309	9.2	259
12.44	4.62	9.22	278	9.22	278	9.22	273
12.48	2.97	9.24	293	9.24	337	9.24	238
12.52	10.23	9.26	249	9.26	329	9.26	208
12.56	5.94	9.28	253	9.28	348	9.28	193
12.6	4.95	9.3	274	9.3	332	9.3	149
12.64	2.31	9.32	270	9.32	357	9.32	129
12.68	4.62	9.34	243	9.34	366	9.34	111
12.72	5.61	9.36	267	9.36	357	9.36	126
12.76	3.63	9.38	245	9.38	329	9.38	103
12.8	4.29	9.4	187	9.4	300	9.4	118
12.84	4.95	9.42	173	9.42	307	9.42	98
12.88	5.28	9.44	152	9.44	249	9.44	101
12.92	4.62	9.46	138	9.46	227	9.46	93
12.96	4.95	9.48	118	9.48	220	9.48	88
13	8.25	9.5	99	9.5	184	9.5	109
13.04	11.22	9.52	134	9.52	164	9.52	93
13.08	14.19	9.54	110	9.54	158	9.54	97
13.12	22.44	9.56	108	9.56	159	9.56	108
13.16	31.35	9.58	112	9.58	166	9.58	70
13.2	49.5	9.6	110	9.6	137	9.6	80
13.24	55.11	9.62	103	9.62	143	9.62	89
13.28	35.97	9.64	103	9.64	147	9.64	98
13.32	15.18	9.66	106	9.66	135	9.66	92
13.36	5.28	9.68	104	9.68	123	9.68	91
13.4	4.95	9.7	96	9.7	113	9.7	107
13.44	3.63	9.72	97	9.72	83	9.72	86
13.48	3.3	9.74	104	9.74	99	9.74	93
13.52	5.28	9.76	96	9.76	102	9.76	84
13.56	7.92	9.78	101	9.78	65	9.78	92
13.6	3.63	9.8	104	9.8	83	9.8	82
13.64	9.57	9.82	92	9.82	74	9.82	105
13.68	6.93	9.84	93	9.84	88	9.84	89
13.72	12.54	9.86	101	9.86	58	9.86	72
13.76	20.13	9.88	89	9.88	63	9.88	87
13.8	23.76	9.9	97	9.9	71	9.9	76
13.84	27.39	9.92	78	9.92	62	9.92	91
13.88	45.87	9.94	94	9.94	73	9.94	92
13.92	63.36	9.96	98	9.96	64	9.96	83
13.96	73.59	9.98	90	9.98	69	9.98	70
14	49.5	10	96	10	57	10	97
14.04	18.15	10.02	97	10.02	72	10.02	74
14.08	7.92	10.04	85	10.04	49	10.04	83
14.12	6.6	10.06	99	10.06	64	10.06	81
14.16	3.63	10.08	85	10.08	57	10.08	57
14.2	2.64	10.1	82	10.1	60	10.1	68
14.24	4.95	10.12	89	10.12	65	10.12	60
14.28	5.28	10.14	75	10.14	65	10.14	53
14.32	6.27	10.16	90	10.16	44	10.16	60
14.36	5.61	10.18	60	10.18	69	10.18	53
14.4	4.95	10.2	55	10.2	57	10.2	53
14.44	12.21	10.22	66	10.22	55	10.22	41
14.48	9.57	10.24	37	10.24	54	10.24	55
14.52	12.87	10.26	47	10.26	51	10.26	47
14.56	17.49	10.28	54	10.28	48	10.28	59
14.6	27.39	10.3	40	10.3	62	10.3	55
14.64	37.95	10.32	57	10.32	56	10.32	49
14.68	51.81	10.34	44	10.34	57	10.34	48
14.72	79.53	10.36	44	10.36	43	10.36	37
14.76	108.57	10.38	53	10.38	50	10.38	44
14.8	112.86	10.4	37	10.4	43	10.4	50
14.84	82.83	10.42	34	10.42	35	10.42	37
14.88	37.95	10.44	37	10.44	32	10.44	36
14.92	44.22	10.46	48	10.46	31	10.46	36
14.96	47.85	10.48	53	10.48	43	10.48	36
15	29.7	10.5	38	10.5	22	10.5	39
15.04	15.51	10.52	33	10.52	36	10.52	43
15.08	8.58	10.54	39	10.54	35	10.54	40
15.12	7.92	10.56	32	10.56	42	10.56	44
15.16	7.92	10.58	31	10.58	38	10.58	41
15.2	6.6	10.6	31	10.6	41	10.6	44
15.24	8.58	10.62	37	10.62	29	10.62	34
15.28	9.24	10.64	42	10.64	32	10.64	42
15.32	11.55	10.66	37	10.66	36	10.66	42
15.36	16.83	10.68	43	10.68	31	10.68	33
15.4	25.74	10.7	40	10.7	32	10.7	30
15.44	35.31	10.72	25	10.72	30	10.72	37
15.48	54.45	10.74	36	10.74	41	10.74	32
15.52	53.46	10.76	31	10.76	26	10.76	32
15.56	45.54	10.78	37	10.78	30	10.78	51
15.6	52.8	10.8	45	10.8	33	10.8	43
15.64	46.86	10.82	48	10.82	27	10.82	25
15.68	26.73	10.84	46	10.84	35	10.84	51
15.72	22.44	10.86	42	10.86	39	10.86	42
15.76	20.13	10.88	45	10.88	28	10.88	33
15.8	36.3	10.9	30	10.9	40	10.9	36
15.84	54.12	10.92	34	10.92	39	10.92	40
15.88	78.21	10.94	45	10.94	37	10.94	41
15.92	82.17	10.96	34	10.96	28	10.96	51
15.96	46.53	10.98	32	10.98	25	10.98	33
16	41.58	11	34	11	35	11	47
16.04	34.65	11.02	39	11.02	18	11.02	40
16.08	18.48	11.04	36	11.04	39	11.04	48
16.12	6.6	11.06	34	11.06	27	11.06	41
16.16	5.94	11.08	39	11.08	37	11.08	35
16.2	5.61	11.1	33	11.1	26	11.1	51
16.24	5.61	11.12	39	11.12	29	11.12	44
16.28	6.93	11.14	39	11.14	25	11.14	30
16.32	6.93	11.16	34	11.16	34	11.16	34
16.36	10.23	11.18	42	11.18	39	11.18	40
16.4	12.21	11.2	32	11.2	33	11.2	30
16.44	15.18	11.22	55	11.22	28	11.22	39
16.48	24.42	11.24	53	11.24	28	11.24	50
16.52	21.45	11.26	50	11.26	45	11.26	22
16.56	19.14	11.28	33	11.28	36	11.28	37
16.6	18.48	11.3	38	11.3	34	11.3	43
16.64	22.44	11.32	30	11.32	36	11.32	33
16.68	12.54	11.34	52	11.34	33	11.34	35
16.72	10.23	11.36	36	11.36	29	11.36	49
16.76	6.27	11.38	40	11.38	36	11.38	50
16.8	5.28	11.4	45	11.4	27	11.4	42
16.84	3.63	11.42	45	11.42	24	11.42	40
16.88	6.6	11.44	25	11.44	36	11.44	20
16.92	4.62	11.46	44	11.46	32	11.46	35
16.96	3.96	11.48	46	11.48	23	11.48	39
17	3.3	11.5	30	11.5	22	11.5	40
17.04	6.93	11.52	29	11.52	31	11.52	33
17.08	4.62	11.54	37	11.54	38	11.54	31
17.12	6.93	11.56	29	11.56	26	11.56	29
17.16	8.58	11.58	41	11.58	36	11.58	40
17.2	9.24	11.6	38	11.6	27	11.6	39
17.24	15.84	11.62	30	11.62	31	11.62	37
17.28	17.49	11.64	47	11.64	29	11.64	36
17.32	14.85	11.66	34	11.66	36	11.66	41
17.36	9.24	11.68	34	11.68	30	11.68	32
17.4	10.23	11.7	34	11.7	32	11.7	38
17.44	7.59	11.72	33	11.72	25	11.72	26
17.48	11.55	11.74	46	11.74	21	11.74	40
17.52	13.53	11.76	36	11.76	38	11.76	48
17.56	22.11	11.78	29	11.78	37	11.78	37
17.6	36.96	11.8	32	11.8	31	11.8	45
17.64	39.27	11.82	40	11.82	33	11.82	45
17.68	33	11.84	33	11.84	35	11.84	49
17.72	23.43	11.86	39	11.86	37	11.86	43
17.76	29.04	11.88	35	11.88	39	11.88	35
17.8	51.48	11.9	37	11.9	31	11.9	40
17.84	52.8	11.92	29	11.92	20	11.92	33
17.88	36.96	11.94	46	11.94	26	11.94	42
17.92	16.5	11.96	30	11.96	27	11.96	45
17.96	6.93	11.98	41	11.98	41	11.98	42
18	4.95	12	45	12	22	12	51
18.04	6.27	12.02	38	12.02	34	12.02	47
18.08	4.62	12.04	50	12.04	27	12.04	46
18.12	7.59	12.06	36	12.06	25	12.06	55
18.16	8.91	12.08	42	12.08	32	12.08	41
18.2	5.61	12.1	60	12.1	28	12.1	47
18.24	5.61	12.12	60	12.12	31	12.12	33
18.28	8.91	12.14	60	12.14	35	12.14	48
18.32	3.3	12.16	46	12.16	28	12.16	40
18.36	3.96	12.18	41	12.18	32	12.18	39
18.4	2.64	12.2	39	12.2	29	12.2	42
18.44	5.28	12.22	37	12.22	23	12.22	38
18.48	3.96	12.24	53	12.24	40	12.24	32
18.52	3.96	12.26	45	12.26	32	12.26	30
18.56	3.63	12.28	27	12.28	46	12.28	40
18.6	5.94	12.3	32	12.3	41	12.3	29
18.64	4.95	12.32	28	12.32	33	12.32	39
18.68	5.94	12.34	24	12.34	27	12.34	36
18.72	6.6	12.36	26	12.36	25	12.36	37
18.76	7.26	12.38	29	12.38	42	12.38	41
18.8	8.91	12.4	39	12.4	34	12.4	43
18.84	7.92	12.42	38	12.42	39	12.42	44
18.88	5.94	12.44	36	12.44	32	12.44	45
18.92	3.96	12.46	35	12.46	39	12.46	31
18.96	7.92	12.48	44	12.48	33	12.48	33
19	6.6	12.5	35	12.5	33	12.5	39
19.04	7.92	12.52	30	12.52	27	12.52	40
19.08	9.9	12.54	31	12.54	35	12.54	48
19.12	13.86	12.56	43	12.56	46	12.56	38
19.16	21.12	12.58	37	12.58	25	12.58	47
19.2	29.04	12.6	36	12.6	39	12.6	41
19.24	32.34	12.62	38	12.62	33	12.62	42
19.28	31.35	12.64	38	12.64	25	12.64	50
19.32	18.15	12.66	31	12.66	30	12.66	51
19.36	17.49	12.68	39	12.68	31	12.68	54
19.4	9.24	12.7	42	12.7	25	12.7	51
19.44	7.26	12.72	32	12.72	38	12.72	46
19.48	10.89	12.74	43	12.74	34	12.74	41
19.52	8.25	12.76	45	12.76	42	12.76	44
19.56	5.61	12.78	29	12.78	37	12.78	39
19.6	10.56	12.8	35	12.8	31	12.8	38
19.64	7.59	12.82	41	12.82	28	12.82	36
19.68	6.93	12.84	43	12.84	40	12.84	42
19.72	6.6	12.86	38	12.86	32	12.86	46
19.76	6.6	12.88	37	12.88	40	12.88	37
19.8	9.9	12.9	39	12.9	30	12.9	43
19.84	8.58	12.92	41	12.92	33	12.92	34
19.88	10.23	12.94	37	12.94	29	12.94	48
19.92	10.89	12.96	39	12.96	33	12.96	44
19.96	12.87	12.98	47	12.98	33	12.98	43
20	7.26	13	34	13	35	13	52
20.04	10.56	13.02	40	13.02	32	13.02	40
20.08	7.92	13.04	34	13.04	40	13.04	46
20.12	8.58	13.06	29	13.06	39	13.06	54
20.16	8.58	13.08	30	13.08	27	13.08	51
20.2	9.9	13.1	37	13.1	30	13.1	58
20.24	15.51	13.12	49	13.12	36	13.12	52
20.28	27.72	13.14	38	13.14	27	13.14	62
20.32	32.34	13.16	38	13.16	23	13.16	63
20.36	51.81	13.18	40	13.18	40	13.18	104
20.4	50.82	13.2	41	13.2	37	13.2	84
20.44	41.58	13.22	50	13.22	28	13.22	78
20.48	28.71	13.24	56	13.24	29	13.24	67
20.52	17.49	13.26	40	13.26	33	13.26	78
20.56	13.86	13.28	72	13.28	34	13.28	91
20.6	10.56	13.3	57	13.3	30	13.3	72
20.64	12.87	13.32	53	13.32	30	13.32	99
20.68	22.11	13.34	52	13.34	40	13.34	97
20.72	38.61	13.36	78	13.36	31	13.36	91
20.76	35.97	13.38	69	13.38	36	13.38	110
20.8	54.12	13.4	68	13.4	36	13.4	97
20.84	57.75	13.42	103	13.42	24	13.42	81
20.88	80.19	13.44	99	13.44	38	13.44	93
20.92	48.18	13.46	92	13.46	45	13.46	59
20.96	34.98	13.48	100	13.48	37	13.48	55
21	18.48	13.5	101	13.5	43	13.5	40
21.04	7.26	13.52	94	13.52	33	13.52	33
21.08	5.28	13.54	65	13.54	35	13.54	47
21.12	3.96	13.56	41	13.56	48	13.56	34
21.16	5.94	13.58	53	13.58	41	13.58	55
21.2	3.63	13.6	34	13.6	65	13.6	51
21.24	2.97	13.62	42	13.62	55	13.62	45
21.28	6.27	13.64	44	13.64	59	13.64	50
21.32	5.28	13.66	38	13.66	45	13.66	46
21.36	3.96	13.68	44	13.68	58	13.68	52
21.4	7.92	13.7	40	13.7	64	13.7	55
21.44	3.3	13.72	41	13.72	51	13.72	51
21.48	7.92	13.74	45	13.74	68	13.74	56
21.52	4.62	13.76	42	13.76	53	13.76	67
21.56	5.28	13.78	39	13.78	59	13.78	57
21.6	7.59	13.8	39	13.8	46	13.8	70
21.64	10.89	13.82	56	13.82	47	13.82	69
21.68	11.55	13.84	56	13.84	58	13.84	77
21.72	21.78	13.86	45	13.86	40	13.86	68
21.76	28.71	13.88	48	13.88	36	13.88	85
21.8	22.44	13.9	43	13.9	31	13.9	76
21.84	20.79	13.92	55	13.92	41	13.92	80
21.88	12.87	13.94	50	13.94	31	13.94	106
21.92	9.57	13.96	50	13.96	44	13.96	95
21.96	6.93	13.98	74	13.98	34	13.98	91
22	11.88	14	66	14	42	14	117
22.04	12.54	14.02	74	14.02	32	14.02	110
22.08	20.13	14.04	72	14.04	34	14.04	103
22.12	29.7	14.06	84	14.06	33	14.06	117
22.16	46.53	14.08	78	14.08	36	14.08	149
22.2	37.62	14.1	110	14.1	47	14.1	122
22.24	22.44	14.12	120	14.12	35	14.12	103
22.28	22.77	14.14	129	14.14	34	14.14	116
22.32	9.24	14.16	105	14.16	27	14.16	88
22.36	8.58	14.18	146	14.18	39	14.18	88
22.4	11.88	14.2	112	14.2	45	14.2	69
22.44	8.91	14.22	114	14.22	46	14.22	38
22.48	11.88	14.24	107	14.24	48	14.24	54
22.52	13.53	14.26	90	14.26	40	14.26	52
22.56	11.88	14.28	70	14.28	44	14.28	56
22.6	13.2	14.3	72	14.3	52	14.3	52
22.64	14.52	14.32	59	14.32	48	14.32	47
22.68	13.53	14.34	41	14.34	54	14.34	39
22.72	16.17	14.36	47	14.36	52	14.36	48
22.76	20.46	14.38	62	14.38	70	14.38	39
22.8	32.67	14.4	37	14.4	61	14.4	54
22.84	58.41	14.42	43	14.42	66	14.42	46
22.88	78.54	14.44	44	14.44	74	14.44	42
22.92	119.13	14.46	35	14.46	79	14.46	51
22.96	193.71	14.48	41	14.48	60	14.48	48
23	312.51	14.5	50	14.5	63	14.5	58
23.04	498.96	14.52	40	14.52	56	14.52	60
23.08	569.58	14.54	52	14.54	44	14.54	55
23.12	403.26	14.56	30	14.56	29	14.56	58
23.16	287.76	14.58	38	14.58	31	14.58	63
23.2	228.69	14.6	32	14.6	41	14.6	84
23.24	277.2	14.62	53	14.62	42	14.62	87
23.28	251.13	14.64	49	14.64	29	14.64	87
23.32	229.68	14.66	59	14.66	33	14.66	95
23.36	248.16	14.68	34	14.68	38	14.68	87
23.4	260.7	14.7	49	14.7	43	14.7	107
23.44	172.26	14.72	46	14.72	37	14.72	104
23.48	99.33	14.74	50	14.74	32	14.74	117
23.52	68.31	14.76	57	14.76	29	14.76	147
23.56	65.01	14.78	57	14.78	35	14.78	126
23.6	87.78	14.8	69	14.8	29	14.8	139
23.64	114.84	14.82	68	14.82	40	14.82	138
23.68	152.79	14.84	88	14.84	28	14.84	171
23.72	154.77	14.86	98	14.86	28	14.86	164
23.76	183.15	14.88	91	14.88	30	14.88	162
23.8	189.42	14.9	102	14.9	22	14.9	187
23.84	205.59	14.92	129	14.92	33	14.92	198
23.88	236.28	14.94	118	14.94	40	14.94	161
23.92	305.91	14.96	149	14.96	33	14.96	165
23.96	337.26	14.98	131	14.98	40	14.98	153
24	235.62	15	168	15	39	15	138
24.04	147.18	15.02	167	15.02	44	15.02	111
24.08	71.94	15.04	163	15.04	41	15.04	97
24.12	64.02	15.06	162	15.06	43	15.06	86
24.16	66.33	15.08	118	15.08	37	15.08	86
24.2	54.78	15.1	136	15.1	68	15.1	72
24.24	61.71	15.12	102	15.12	47	15.12	78
24.28	86.46	15.14	92	15.14	59	15.14	67
24.32	103.62	15.16	92	15.16	75	15.16	64
24.36	101.64	15.18	96	15.18	71	15.18	55
24.4	72.6	15.2	68	15.2	79	15.2	63
24.44	58.74	15.22	70	15.22	95	15.22	48
24.48	63.03	15.24	77	15.24	109	15.24	44
24.52	99.99	15.26	66	15.26	88	15.26	45
24.56	107.58	15.28	58	15.28	82	15.28	53
24.6	106.59	15.3	52	15.3	93	15.3	59
24.64	67.32	15.32	48	15.32	88	15.32	49
24.68	33.66	15.34	50	15.34	78	15.34	59
24.72	23.76	15.36	44	15.36	75	15.36	55
24.76	23.43	15.38	43	15.38	50	15.38	58
24.8	19.14	15.4	41	15.4	51	15.4	73
24.84	14.19	15.42	42	15.42	51	15.42	80
24.88	11.55	15.44	38	15.44	50	15.44	71
24.92	12.54	15.46	32	15.46	42	15.46	62
24.96	5.61	15.48	41	15.48	50	15.48	75
25	6.27	15.5	43	15.5	39	15.5	70
25.04	5.61	15.52	52	15.52	41	15.52	90
25.08	7.26	15.54	39	15.54	25	15.54	82
25.12	5.28	15.56	62	15.56	35	15.56	97
25.16	6.6	15.58	62	15.58	36	15.58	91
25.2	5.94	15.6	79	15.6	31	15.6	90
25.24	6.27	15.62	62	15.62	29	15.62	111
25.28	7.92	15.64	61	15.64	32	15.64	103
25.32	8.91	15.66	68	15.66	40	15.66	112
25.36	6.93	15.68	75	15.68	28	15.68	102
25.4	11.22	15.7	82	15.7	42	15.7	96
25.44	18.15	15.72	76	15.72	41	15.72	77
25.48	24.42	15.74	82	15.74	27	15.74	102
25.52	32.34	15.76	91	15.76	35	15.76	100
25.56	38.94	15.78	95	15.78	23	15.78	123
25.6	27.39	15.8	83	15.8	37	15.8	94
25.64	24.42	15.82	88	15.82	45	15.82	91
25.68	36.3	15.84	66	15.84	31	15.84	109
25.72	43.23	15.86	65	15.86	41	15.86	93
25.76	46.2	15.88	74	15.88	29	15.88	87
25.8	51.15	15.9	82	15.9	45	15.9	84
25.84	55.44	15.92	70	15.92	46	15.92	91
25.88	51.15	15.94	78	15.94	53	15.94	88
25.92	46.2	15.96	74	15.96	61	15.96	106
25.96	66	15.98	73	15.98	49	15.98	83
26	64.68	16	73	16	48	16	98
26.04	33.66	16.02	70	16.02	57	16.02	103
26.08	33.66	16.04	84	16.04	50	16.04	127
26.12	19.8	16.06	81	16.06	72	16.06	101
26.16	23.1	16.08	101	16.08	51	16.08	96
26.2	26.07	16.1	103	16.1	50	16.1	110
26.24	23.43	16.12	92	16.12	43	16.12	94
26.28	21.45	16.14	92	16.14	63	16.14	82
26.32	18.48	16.16	117	16.16	43	16.16	54
26.36	16.17	16.18	99	16.18	55	16.18	66
26.4	16.17	16.2	108	16.2	36	16.2	60
26.44	21.45	16.22	108	16.22	44	16.22	51
26.48	31.68	16.24	79	16.24	41	16.24	50
26.52	43.89	16.26	81	16.26	57	16.26	44
26.56	56.76	16.28	45	16.28	43	16.28	36
26.6	49.17	16.3	54	16.3	58	16.3	42
26.64	35.31	16.32	45	16.32	68	16.32	47
26.68	22.11	16.34	61	16.34	70	16.34	37
26.72	23.1	16.36	43	16.36	66	16.36	44
26.76	27.72	16.38	47	16.38	60	16.38	41
26.8	29.04	16.4	37	16.4	72	16.4	38
26.84	44.22	16.42	38	16.42	70	16.42	47
26.88	60.39	16.44	33	16.44	69	16.44	47
26.92	66.66	16.46	33	16.46	56	16.46	37
26.96	74.58	16.48	37	16.48	68	16.48	42
27	84.15	16.5	24	16.5	40	16.5	51
27.04	63.36	16.52	28	16.52	40	16.52	40
27.08	44.55	16.54	36	16.54	39	16.54	60
27.12	23.76	16.56	41	16.56	33	16.56	52
27.16	15.51	16.58	46	16.58	31	16.58	56
27.2	16.83	16.6	41	16.6	35	16.6	67
27.24	16.17	16.62	46	16.62	30	16.62	62
27.28	20.13	16.64	40	16.64	32	16.64	51
27.32	25.74	16.66	52	16.66	21	16.66	61
27.36	31.35	16.68	54	16.68	22	16.68	59
27.4	36.63	16.7	62	16.7	25	16.7	55
27.44	34.98	16.72	42	16.72	27	16.72	49
27.48	26.07	16.74	51	16.74	35	16.74	59
27.52	18.15	16.76	50	16.76	37	16.76	60
27.56	10.89	16.78	47	16.78	18	16.78	52
27.6	15.84	16.8	41	16.8	33	16.8	45
27.64	21.78	16.82	46	16.82	32	16.82	30
27.68	20.13	16.84	41	16.84	30	16.84	46
27.72	13.2	16.86	46	16.86	33	16.86	43
27.76	9.9	16.88	48	16.88	34	16.88	39
27.8	7.92	16.9	50	16.9	31	16.9	35
27.84	6.93	16.92	41	16.92	36	16.92	34
27.88	9.57	16.94	50	16.94	26	16.94	36
27.92	9.57	16.96	55	16.96	27	16.96	28
27.96	8.91	16.98	28	16.98	35	16.98	22
28	13.53	17	40	17	35	17	26
28.04	14.52	17.02	27	17.02	35	17.02	35
28.08	19.47	17.04	25	17.04	38	17.04	35
28.12	21.78	17.06	26	17.06	34	17.06	40
28.16	15.51	17.08	17	17.08	35	17.08	32
28.2	13.86	17.1	24	17.1	43	17.1	43
28.24	12.21	17.12	33	17.12	31	17.12	43
28.28	13.86	17.14	23	17.14	31	17.14	42
28.32	20.46	17.16	24	17.16	19	17.16	28
28.36	19.47	17.18	30	17.18	31	17.18	45
28.4	25.41	17.2	34	17.2	31	17.2	41
28.44	19.8	17.22	28	17.22	27	17.22	38
28.48	16.17	17.24	33	17.24	25	17.24	30
28.52	14.52	17.26	34	17.26	22	17.26	26
28.56	17.82	17.28	20	17.28	20	17.28	43
28.6	15.18	17.3	21	17.3	25	17.3	44
28.64	13.53	17.32	18	17.32	32	17.32	41
28.68	11.88	17.34	30	17.34	35	17.34	39
28.72	7.92	17.36	31	17.36	26	17.36	41
28.76	10.23	17.38	27	17.38	16	17.38	47
28.8	11.22	17.4	39	17.4	19	17.4	41
28.84	9.57	17.42	39	17.42	21	17.42	51
28.88	11.22	17.44	47	17.44	26	17.44	42
28.92	7.59	17.46	38	17.46	28	17.46	40
28.96	12.21	17.48	33	17.48	24	17.48	49
29	14.85	17.5	35	17.5	30	17.5	56
29.04	17.16	17.52	43	17.52	22	17.52	51
29.08	21.45	17.54	37	17.54	29	17.54	49
29.12	35.97	17.56	46	17.56	21	17.56	46
29.16	47.19	17.58	32	17.58	20	17.58	56
29.2	56.43	17.6	21	17.6	23	17.6	52
29.24	53.46	17.62	33	17.62	21	17.62	52
29.28	49.17	17.64	41	17.64	35	17.64	50
29.32	42.57	17.66	37	17.66	18	17.66	55
29.36	47.85	17.68	29	17.68	28	17.68	60
29.4	69.3	17.7	36	17.7	20	17.7	59
29.44	50.16	17.72	43	17.72	29	17.72	68
29.48	33.33	17.74	42	17.74	25	17.74	62
29.52	24.09	17.76	41	17.76	26	17.76	86
29.56	16.5	17.78	43	17.78	29	17.78	63
29.6	13.53	17.8	55	17.8	29	17.8	82
29.64	19.14	17.82	37	17.82	33	17.82	68
29.68	22.44	17.84	44	17.84	18	17.84	64
29.72	31.02	17.86	43	17.86	24	17.86	69
29.76	42.24	17.88	69	17.88	28	17.88	55
29.8	66	17.9	66	17.9	20	17.9	73
29.84	103.29	17.92	71	17.92	23	17.92	59
29.88	156.75	17.94	69	17.94	21	17.94	59
29.92	147.18	17.96	71	17.96	16	17.96	56
29.96	113.52	17.98	65	17.98	27	17.98	67
30	79.2	18	59	18	31	18	73
30.04	44.55	18.02	48	18.02	22	18.02	63
30.08	48.18	18.04	63	18.04	21	18.04	46
30.12	60.06	18.06	58	18.06	39	18.06	62
30.16	73.26	18.08	65	18.08	40	18.08	37
30.2	76.56	18.1	57	18.1	37	18.1	43
30.24	83.82	18.12	60	18.12	43	18.12	29
30.28	66.99	18.14	53	18.14	29	18.14	36
30.32	54.78	18.16	40	18.16	36	18.16	30
30.36	35.31	18.18	38	18.18	29	18.18	29
30.4	20.13	18.2	33	18.2	32	18.2	22
30.44	12.87	18.22	31	18.22	55	18.22	29
30.48	18.15	18.24	21	18.24	38	18.24	33
30.52	23.76	18.26	23	18.26	43	18.26	39
30.56	23.1	18.28	30	18.28	46	18.28	32
30.6	25.08	18.3	20	18.3	47	18.3	36
30.64	20.13	18.32	28	18.32	37	18.32	38
30.68	15.18	18.34	34	18.34	35	18.34	22
30.72	10.89	18.36	26	18.36	35	18.36	21
30.76	11.88	18.38	35	18.38	33	18.38	27
30.8	8.58	18.4	36	18.4	32	18.4	26
30.84	8.58	18.42	27	18.42	35	18.42	27
30.88	6.93	18.44	31	18.44	25	18.44	24
30.92	7.26	18.46	28	18.46	26	18.46	29
30.96	13.2	18.48	28	18.48	24	18.48	22
31	9.9	18.5	21	18.5	13	18.5	25
31.04	10.89	18.52	26	18.52	19	18.52	27
31.08	12.87	18.54	19	18.54	24	18.54	19
31.12	19.14	18.56	33	18.56	13	18.56	22
31.16	27.72	18.58	27	18.58	29	18.58	17
31.2	29.04	18.6	25	18.6	24	18.6	23
31.24	30.69	18.62	21	18.62	27	18.62	21
31.28	31.02	18.64	22	18.64	28	18.64	30
31.32	25.74	18.66	19	18.66	11	18.66	26
31.36	20.46	18.68	19	18.68	22	18.68	18
31.4	21.12	18.7	22	18.7	26	18.7	33
31.44	17.49	18.72	31	18.72	22	18.72	21
31.48	19.47	18.74	25	18.74	27	18.74	24
31.52	18.48	18.76	19	18.76	15	18.76	29
31.56	17.16	18.78	26	18.78	30	18.78	20
31.6	14.85	18.8	19	18.8	14	18.8	29
31.64	14.52	18.82	24	18.82	22	18.82	34
31.68	13.2	18.84	26	18.84	23	18.84	24
31.72	11.22	18.86	29	18.86	23	18.86	27
31.76	13.86	18.88	19	18.88	17	18.88	27
31.8	11.88	18.9	20	18.9	14	18.9	34
31.84	13.86	18.92	16	18.92	14	18.92	25
31.88	8.58	18.94	26	18.94	14	18.94	31
31.92	7.59	18.96	23	18.96	21	18.96	29
31.96	8.91	18.98	28	18.98	19	18.98	26
32	10.23	19	27	19	15	19	29
32.04	13.86	19.02	28	19.02	19	19.02	32
32.08	19.8	19.04	26	19.04	25	19.04	32
32.12	21.78	19.06	21	19.06	14	19.06	24
32.16	20.79	19.08	29	19.08	15	19.08	48
32.2	13.86	19.1	26	19.1	18	19.1	31
32.24	12.87	19.12	29	19.12	21	19.12	30
32.28	12.87	19.14	32	19.14	15	19.14	30
32.32	11.88	19.16	28	19.16	21	19.16	40
32.36	15.51	19.18	18	19.18	21	19.18	43
32.4	14.85	19.2	32	19.2	13	19.2	37
32.44	14.52	19.22	17	19.22	19	19.22	39
32.48	14.19	19.24	19	19.24	21	19.24	52
32.52	15.51	19.26	22	19.26	28	19.26	30
32.56	15.51	19.28	25	19.28	23	19.28	46
32.6	20.46	19.3	31	19.3	19	19.3	53
32.64	25.41	19.32	21	19.32	23	19.32	40
32.68	34.32	19.34	28	19.34	16	19.34	41
32.72	42.57	19.36	36	19.36	19	19.36	46
32.76	35.31	19.38	32	19.38	21	19.38	56
32.8	40.26	19.4	42	19.4	25	19.4	45
32.84	30.03	19.42	36	19.42	23	19.42	51
32.88	32.67	19.44	50	19.44	21	19.44	49
32.92	22.77	19.46	56	19.46	20	19.46	50
32.96	22.44	19.48	40	19.48	13	19.48	39
33	14.52	19.5	45	19.5	27	19.5	34
33.04	9.57	19.52	41	19.52	17	19.52	51
33.08	11.55	19.54	50	19.54	15	19.54	38
33.12	8.25	19.56	48	19.56	15	19.56	41
33.16	9.57	19.58	42	19.58	19	19.58	30
33.2	8.91	19.6	25	19.6	20	19.6	18
33.24	10.89	19.62	32	19.62	22	19.62	29
33.28	12.54	19.64	28	19.64	24	19.64	36
33.32	10.89	19.66	25	19.66	22	19.66	32
33.36	20.79	19.68	36	19.68	37	19.68	40
33.4	24.75	19.7	33	19.7	31	19.7	39
33.44	26.4	19.72	33	19.72	33	19.72	16
33.48	20.13	19.74	27	19.74	31	19.74	25
33.52	14.19	19.76	27	19.76	31	19.76	27
33.56	11.55	19.78	22	19.78	24	19.78	34
33.6	10.89	19.8	33	19.8	43	19.8	33
33.64	12.87	19.82	27	19.82	21	19.82	32
33.68	22.11	19.84	28	19.84	28	19.84	30
33.72	20.46	19.86	18	19.86	29	19.86	42
33.76	20.46	19.88	29	19.88	30	19.88	26
33.8	21.12	19.9	22	19.9	25	19.9	33
33.84	15.51	19.92	20	19.92	19	19.92	34
33.88	15.51	19.94	19	19.94	22	19.94	32
33.92	18.81	19.96	32	19.96	19	19.96	34
33.96	15.84	19.98	21	19.98	20	19.98	25
34	14.52	20	20	20	21	20	34
34.04	12.54	20.02	29	20.02	19	20.02	31
34.08	17.49	20.04	25	20.04	15	20.04	36
34.12	10.23	20.06	29	20.06	15	20.06	35
34.16	15.84	20.08	27	20.08	19	20.08	29
34.2	18.81	20.1	29	20.1	17	20.1	32
34.24	30.03	20.12	26	20.12	24	20.12	31
34.28	35.31	20.14	34	20.14	14	20.14	43
34.32	33.33	20.16	28	20.16	21	20.16	28
34.36	29.37	20.18	27	20.18	24	20.18	21
34.4	27.72	20.2	27	20.2	16	20.2	36
34.44	24.42	20.22	27	20.22	20	20.22	41
34.48	22.11	20.24	27	20.24	19	20.24	34
34.52	30.36	20.26	36	20.26	21	20.26	38
34.56	30.03	20.28	18	20.28	25	20.28	50
34.6	32.34	20.3	18	20.3	25	20.3	53
34.64	24.09	20.32	28	20.32	16	20.32	52
34.68	27.72	20.34	20	20.34	15	20.34	49
34.72	23.76	20.36	26	20.36	17	20.36	52
34.76	19.47	20.38	34	20.38	22	20.38	61
34.8	17.82	20.4	34	20.4	25	20.4	59
34.84	22.44	20.42	23	20.42	26	20.42	63
34.88	19.47	20.44	23	20.44	22	20.44	71
34.92	24.42	20.46	42	20.46	15	20.46	65
34.96	16.83	20.48	41	20.48	13	20.48	63
35	30.69	20.5	37	20.5	24	20.5	61
35.04	29.7	20.52	46	20.52	20	20.52	55
35.08	29.37	20.54	58	20.54	20	20.54	63
35.12	33.99	20.56	68	20.56	23	20.56	54
35.16	22.77	20.58	44	20.58	16	20.58	57
35.2	19.47	20.6	61	20.6	22	20.6	54
35.24	20.46	20.62	70	20.62	12	20.62	45
35.28	10.89	20.64	62	20.64	14	20.64	57
35.32	9.9	20.66	57	20.66	22	20.66	33
35.36	12.54	20.68	65	20.68	24	20.68	43
35.4	10.89	20.7	57	20.7	17	20.7	42
35.44	9.9	20.72	52	20.72	19	20.72	51
35.48	16.5	20.74	39	20.74	19	20.74	58
35.52	14.19	20.76	43	20.76	29	20.76	57
35.56	21.12	20.78	40	20.78	37	20.78	62
35.6	28.38	20.8	26	20.8	32	20.8	56
35.64	40.92	20.82	36	20.82	40	20.82	59
35.68	38.94	20.84	26	20.84	35	20.84	76
35.72	27.72	20.86	31	20.86	34	20.86	68
35.76	27.06	20.88	29	20.88	28	20.88	69
35.8	21.78	20.9	41	20.9	28	20.9	69
35.84	13.2	20.92	55	20.92	39	20.92	65
35.88	14.85	20.94	45	20.94	36	20.94	82
35.92	15.84	20.96	55	20.96	36	20.96	81
35.96	21.12	20.98	51	20.98	32	20.98	75
36	34.32	21	77	21	24	21	91
36.04	43.89	21.02	60	21.02	26	21.02	65
36.08	56.43	21.04	58	21.04	28	21.04	60
36.12	59.4	21.06	66	21.06	25	21.06	66
36.16	50.16	21.08	91	21.08	26	21.08	71
36.2	41.91	21.1	70	21.1	27	21.1	50
36.24	41.58	21.12	70	21.12	25	21.12	34
36.28	38.94	21.14	71	21.14	15	21.14	41
36.32	42.24	21.16	57	21.16	29	21.16	43
36.36	31.35	21.18	66	21.18	30	21.18	39
36.4	28.38	21.2	49	21.2	34	21.2	34
36.44	24.75	21.22	42	21.22	25	21.22	36
36.48	23.76	21.24	45	21.24	36	21.24	22
36.52	20.13	21.26	41	21.26	47	21.26	32
36.56	21.78	21.28	26	21.28	42	21.28	23
36.6	22.11	21.3	30	21.3	40	21.3	25
36.64	17.82	21.32	22	21.32	45	21.32	22
36.68	14.85	21.34	29	21.34	50	21.34	31
36.72	16.83	21.36	27	21.36	49	21.36	21
36.76	15.18	21.38	17	21.38	37	21.38	31
36.8	15.51	21.4	27	21.4	34	21.4	22
36.84	14.52	21.42	20	21.42	31	21.42	27
36.88	14.19	21.44	23	21.44	33	21.44	34
36.92	15.51	21.46	33	21.46	32	21.46	24
36.96	16.17	21.48	18	21.48	32	21.48	30
37	14.19	21.5	27	21.5	25	21.5	19
37.04	17.16	21.52	20	21.52	16	21.52	28
37.08	13.86	21.54	18	21.54	26	21.54	24
37.12	21.78	21.56	26	21.56	19	21.56	28
37.16	34.98	21.58	26	21.58	16	21.58	22
37.2	40.59	21.6	30	21.6	15	21.6	21
37.24	34.65	21.62	18	21.62	13	21.62	28
37.28	30.69	21.64	22	21.64	21	21.64	27
37.32	27.39	21.66	21	21.66	17	21.66	29
37.36	31.68	21.68	19	21.68	12	21.68	16
37.4	36.96	21.7	21	21.7	23	21.7	25
37.44	41.25	21.72	29	21.72	18	21.72	32
37.48	34.32	21.74	21	21.74	16	21.74	39
37.52	39.6	21.76	20	21.76	17	21.76	27
37.56	43.56	21.78	26	21.78	17	21.78	34
37.6	43.56	21.8	22	21.8	24	21.8	27
37.64	36.63	21.82	33	21.82	20	21.82	38
37.68	34.65	21.84	26	21.84	20	21.84	24
37.72	30.36	21.86	29	21.86	23	21.86	36
37.76	31.35	21.88	27	21.88	14	21.88	41
37.8	20.46	21.9	30	21.9	25	21.9	37
37.84	17.82	21.92	19	21.92	9	21.92	32
37.88	17.49	21.94	33	21.94	18	21.94	34
37.92	16.5	21.96	31	21.96	26	21.96	46
37.96	13.86	21.98	35	21.98	14	21.98	44
38	12.21	22	41	22	22	22	44
38.04	12.87	22.02	25	22.02	16	22.02	31
38.08	13.53	22.04	31	22.04	19	22.04	29
38.12	13.2	22.06	31	22.06	14	22.06	37
38.16	12.54	22.08	29	22.08	22	22.08	44
38.2	13.53	22.1	38	22.1	22	22.1	34
38.24	17.16	22.12	37	22.12	11	22.12	42
38.28	13.2	22.14	28	22.14	16	22.14	37
38.32	11.55	22.16	18	22.16	21	22.16	44
38.36	11.55	22.18	29	22.18	25	22.18	40
38.4	6.93	22.2	32	22.2	19	22.2	40
38.44	9.57	22.22	29	22.22	26	22.22	44
38.48	10.23	22.24	27	22.24	23	22.24	45
38.52	10.23	22.26	24	22.26	26	22.26	36
38.56	13.2	22.28	20	22.28	27	22.28	48
38.6	15.18	22.3	26	22.3	23	22.3	36
38.64	21.78	22.32	43	22.32	24	22.32	50
38.68	22.11	22.34	36	22.34	16	22.34	58
38.72	20.13	22.36	48	22.36	21	22.36	42
38.76	14.52	22.38	35	22.38	21	22.38	47
38.8	19.47	22.4	41	22.4	17	22.4	44
38.84	20.13	22.42	41	22.42	19	22.42	48
38.88	15.18	22.44	44	22.44	16	22.44	34
38.92	14.85	22.46	38	22.46	21	22.46	39
38.96	11.22	22.48	39	22.48	19	22.48	32
39	11.55	22.5	26	22.5	29	22.5	31
39.04	13.53	22.52	35	22.52	23	22.52	26
39.08	10.23	22.54	41	22.54	24	22.54	31
39.12	11.55	22.56	30	22.56	21	22.56	32
39.16	13.2	22.58	38	22.58	24	22.58	35
39.2	15.18	22.6	26	22.6	31	22.6	37
39.24	11.22	22.62	26	22.62	28	22.62	34
39.28	14.52	22.64	35	22.64	32	22.64	36
39.32	13.53	22.66	41	22.66	25	22.66	27
39.36	13.53	22.68	41	22.68	29	22.68	27
39.4	10.23	22.7	32	22.7	31	22.7	45
39.44	11.88	22.72	28	22.72	28	22.72	40
39.48	8.25	22.74	25	22.74	18	22.74	42
39.52	10.89	22.76	31	22.76	26	22.76	50
39.56	8.58	22.78	36	22.78	21	22.78	42
39.6	11.55	22.8	27	22.8	24	22.8	50
39.64	11.88	22.82	22	22.82	22	22.82	46
39.68	8.58	22.84	30	22.84	25	22.84	48
39.72	9.9	22.86	19	22.86	14	22.86	77
39.76	10.23	22.88	28	22.88	19	22.88	96
39.8	10.56	22.9	35	22.9	27	22.9	94
39.84	7.92	22.92	31	22.92	23	22.92	118
39.88	8.25	22.94	29	22.94	27	22.94	191
39.92	6.6	22.96	30	22.96	25	22.96	170
39.96	8.25	22.98	34	22.98	23	22.98	198
40	6.27	23	40	23	25	23	224
40.04	7.26	23.02	33	23.02	22	23.02	256
40.08	7.26	23.04	43	23.04	27	23.04	262
40.12	6.93	23.06	62	23.06	27	23.06	281
40.16	7.92	23.08	59	23.08	24	23.08	300
40.2	8.58	23.1	85	23.1	23	23.1	310
40.24	9.9	23.12	96	23.12	23	23.12	359
40.28	10.89	23.14	137	23.14	25	23.14	386
40.32	8.91	23.16	175	23.16	33	23.16	417
40.36	16.5	23.18	204	23.18	28	23.18	435
40.4	16.17	23.2	242	23.2	34	23.2	436
40.44	12.87	23.22	282	23.22	28	23.22	436
40.48	14.85	23.24	308	23.24	35	23.24	452
40.52	9.57	23.26	360	23.26	22	23.26	450
40.56	13.2	23.28	388	23.28	37	23.28	476
40.6	14.85	23.3	407	23.3	56	23.3	418
40.64	15.84	23.32	401	23.32	40	23.32	375
40.68	16.5	23.34	452	23.34	48	23.34	365
40.72	11.55	23.36	399	23.36	49	23.36	297
40.76	11.55	23.38	355	23.38	73	23.38	303
40.8	14.85	23.4	319	23.4	60	23.4	255
40.84	13.2	23.42	298	23.42	77	23.42	266
40.88	12.87	23.44	299	23.44	117	23.44	264
40.92	16.83	23.46	267	23.46	131	23.46	236
40.96	18.48	23.48	263	23.48	177	23.48	255
41	15.18	23.5	259	23.5	204	23.5	240
41.04	23.76	23.52	276	23.52	226	23.52	231
41.08	29.04	23.54	247	23.54	220	23.54	221
41.12	25.41	23.56	244	23.56	222	23.56	190
41.16	21.45	23.58	230	23.58	254	23.58	176
41.2	16.5	23.6	185	23.6	212	23.6	175
41.24	10.89	23.62	228	23.62	220	23.62	174
41.28	17.16	23.64	209	23.64	194	23.64	144
41.32	17.16	23.66	190	23.66	165	23.66	152
41.36	23.1	23.68	155	23.68	183	23.68	147
41.4	26.4	23.7	138	23.7	159	23.7	147
41.44	20.79	23.72	115	23.72	154	23.72	108
41.48	21.45	23.74	95	23.74	148	23.74	154
41.52	19.47	23.76	93	23.76	140	23.76	156
41.56	22.77	23.78	92	23.78	135	23.78	166
41.6	18.15	23.8	100	23.8	139	23.8	194
41.64	24.09	23.82	101	23.82	129	23.82	202
41.68	19.8	23.84	118	23.84	143	23.84	214
41.72	18.15	23.86	98	23.86	125	23.86	231
41.76	15.51	23.88	115	23.88	134	23.88	235
41.8	14.19	23.9	140	23.9	112	23.9	234
41.84	15.18	23.92	124	23.92	80	23.92	244
41.88	8.58	23.94	136	23.94	80	23.94	237
41.92	7.92	23.96	181	23.96	68	23.96	225
41.96	6.27	23.98	165	23.98	63	23.98	235
42	9.57	24	157	24	53	24	249
42.04	13.86	24.02	173	24.02	47	24.02	240
42.08	11.22	24.04	194	24.04	57	24.04	224
42.12	7.92	24.06	197	24.06	50	24.06	228
42.16	9.24	24.08	227	24.08	59	24.08	197
42.2	5.61	24.1	218	24.1	66	24.1	239
42.24	7.92	24.12	222	24.12	60	24.12	206
42.28	8.25	24.14	264	24.14	81	24.14	208
42.32	10.56	24.16	246	24.16	48	24.16	217
42.36	9.57	24.18	253	24.18	78	24.18	157
42.4	12.21	24.2	241	24.2	91	24.2	150
42.44	15.51	24.22	223	24.22	104	24.22	137
42.48	21.78	24.24	209	24.24	82	24.24	127
42.52	18.81	24.26	184	24.26	103	24.26	107
42.56	13.86	24.28	170	24.28	104	24.28	92
42.6	17.49	24.3	138	24.3	100	24.3	108
42.64	13.86	24.32	93	24.32	91	24.32	81
42.68	10.89	24.34	98	24.34	113	24.34	115
42.72	8.91	24.36	80	24.36	115	24.36	107
42.76	9.57	24.38	82	24.38	143	24.38	87
42.8	14.52	24.4	69	24.4	140	24.4	96
42.84	14.85	24.42	78	24.42	152	24.42	105
42.88	15.84	24.44	71	24.44	132	24.44	99
42.92	18.81	24.46	76	24.46	127	24.46	115
42.96	16.83	24.48	92	24.48	100	24.48	116
43	16.5	24.5	93	24.5	118	24.5	114
43.04	16.5	24.52	96	24.52	95	24.52	104
43.08	16.17	24.54	84	24.54	87	24.54	118
43.12	21.78	24.56	100	24.56	67	24.56	114
43.16	23.1	24.58	90	24.58	73	24.58	115
43.2	17.49	24.6	94	24.6	48	24.6	98
43.24	20.46	24.62	97	24.62	53	24.62	93
43.28	22.11	24.64	79	24.64	46	24.64	92
43.32	17.16	24.66	84	24.66	44	24.66	100
43.36	16.83	24.68	76	24.68	46	24.68	78
43.4	19.47	24.7	103	24.7	38	24.7	72
43.44	19.14	24.72	83	24.72	41	24.72	95
43.48	23.1	24.74	96	24.74	55	24.74	92
43.52	21.45	24.76	74	24.76	62	24.76	68
43.56	23.43	24.78	92	24.78	62	24.78	73
43.6	23.1	24.8	79	24.8	59	24.8	69
43.64	24.42	24.82	68	24.82	58	24.82	72
43.68	18.81	24.84	80	24.84	66	24.84	56
43.72	19.14	24.86	60	24.86	46	24.86	49
43.76	14.19	24.88	81	24.88	54	24.88	34
43.8	14.85	24.9	57	24.9	63	24.9	45
43.84	13.86	24.92	49	24.92	46	24.92	42
43.88	8.91	24.94	46	24.94	52	24.94	34
43.92	14.19	24.96	58	24.96	44	24.96	43
43.96	12.54	24.98	57	24.98	48	24.98	32
44	11.88	25	32	25	39	25	39
44.04	13.86	25.02	34	25.02	47	25.02	39
44.08	13.86	25.04	31	25.04	53	25.04	25
44.12	12.21	25.06	36	25.06	44	25.06	36
44.16	14.85	25.08	28	25.08	49	25.08	28
44.2	11.22	25.1	35	25.1	51	25.1	31
44.24	11.22	25.12	32	25.12	50	25.12	33
44.28	13.53	25.14	24	25.14	47	25.14	19
44.32	12.54	25.16	28	25.16	41	25.16	32
44.36	11.55	25.18	32	25.18	28	25.18	17
44.4	13.2	25.2	22	25.2	24	25.2	20
44.44	10.56	25.22	26	25.22	37	25.22	27
44.48	9.9	25.24	17	25.24	33	25.24	24
44.52	10.56	25.26	29	25.26	28	25.26	28
44.56	10.56	25.28	23	25.28	31	25.28	32
44.6	11.88	25.3	27	25.3	25	25.3	30
44.64	11.88	25.32	22	25.32	22	25.32	31
44.68	12.87	25.34	19	25.34	28	25.34	34
44.72	17.16	25.36	20	25.36	21	25.36	26
44.76	16.5	25.38	30	25.38	22	25.38	29
44.8	18.48	25.4	24	25.4	23	25.4	21
44.84	21.45	25.42	35	25.42	26	25.42	28
44.88	26.4	25.44	19	25.44	20	25.44	36
44.92	51.15	25.46	17	25.46	17	25.46	36
44.96	71.61	25.48	25	25.48	22	25.48	46
45	103.95	25.5	16	25.5	22	25.5	19
45.04	120.12	25.52	26	25.52	25	25.52	38
45.08	119.13	25.54	24	25.54	21	25.54	35
45.12	92.73	25.56	26	25.56	22	25.56	41
45.16	91.74	25.58	34	25.58	16	25.58	34
45.2	76.89	25.6	31	25.6	11	25.6	50
45.24	59.73	25.62	30	25.62	23	25.62	36
45.28	44.88	25.64	37	25.64	17	25.64	49
45.32	47.19	25.66	47	25.66	26	25.66	61
45.36	52.14	25.68	43	25.68	32	25.68	55
45.4	44.88	25.7	35	25.7	21	25.7	47
45.44	47.19	25.72	40	25.72	28	25.72	53
45.48	65.01	25.74	45	25.74	12	25.74	48
45.52	94.05	25.76	36	25.76	20	25.76	52
45.56	109.56	25.78	39	25.78	18	25.78	59
45.6	101.64	25.8	44	25.8	14	25.8	61
45.64	89.1	25.82	47	25.82	22	25.82	54
45.68	87.45	25.84	40	25.84	24	25.84	60
45.72	67.98	25.86	46	25.86	26	25.86	65
45.76	42.9	25.88	41	25.88	22	25.88	82
45.8	41.58	25.9	50	25.9	28	25.9	62
45.84	26.73	25.92	54	25.92	27	25.92	80
45.88	25.74	25.94	41	25.94	20	25.94	69
45.92	23.76	25.96	43	25.96	26	25.96	72
45.96	21.78	25.98	60	25.98	33	25.98	74
46	23.43	26	44	26	21	26	66
46.04	25.74	26.02	49	26.02	26	26.02	73
46.08	14.85	26.04	53	26.04	26	26.04	78
46.12	16.83	26.06	59	26.06	18	26.06	67
46.16	19.47	26.08	64	26.08	34	26.08	69
46.2	19.8	26.1	48	26.1	24	26.1	71
46.24	19.47	26.12	67	26.12	37	26.12	65
46.28	18.81	26.14	64	26.14	25	26.14	51
46.32	20.79	26.16	76	26.16	27	26.16	46
46.36	24.42	26.18	67	26.18	37	26.18	46
46.4	28.71	26.2	53	26.2	30	26.2	55
46.44	43.23	26.22	57	26.22	31	26.22	58
46.48	38.28	26.24	45	26.24	28	26.24	48
46.52	33	26.26	40	26.26	31	26.26	55
46.56	32.67	26.28	52	26.28	34	26.28	47
46.6	32.67	26.3	53	26.3	26	26.3	42
46.64	34.65	26.32	49	26.32	37	26.32	54
46.68	37.29	26.34	32	26.34	37	26.34	41
46.72	24.42	26.36	32	26.36	35	26.36	44
46.76	22.11	26.38	33	26.38	32	26.38	39
46.8	22.44	26.4	37	26.4	35	26.4	31
46.84	20.46	26.42	41	26.42	41	26.42	42
46.88	16.5	26.44	40	26.44	34	26.44	35
46.92	14.85	26.46	30	26.46	43	26.46	36
46.96	13.86	26.48	46	26.48	28	26.48	37
47	12.21	26.5	30	26.5	38	26.5	52
47.04	14.52	26.52	26	26.52	31	26.52	42
47.08	15.51	26.54	31	26.54	41	26.54	45
47.12	17.16	26.56	40	26.56	33	26.56	41
47.16	27.39	26.58	32	26.58	27	26.58	44
47.2	24.42	26.6	31	26.6	25	26.6	51
47.24	31.35	26.62	39	26.62	17	26.62	43
47.28	28.71	26.64	35	26.64	24	26.64	43
47.32	33.99	26.66	36	26.66	22	26.66	48
47.36	32.01	26.68	42	26.68	31	26.68	42
47.4	39.6	26.7	42	26.7	23	26.7	44
47.44	43.89	26.72	45	26.72	27	26.72	38
47.48	40.26	26.74	49	26.74	23	26.74	48
47.52	37.29	26.76	47	26.76	27	26.76	49
47.56	43.89	26.78	44	26.78	28	26.78	54
47.6	28.05	26.8	57	26.8	30	26.8	61
47.64	22.77	26.82	48	26.82	33	26.82	61
47.68	30.36	26.84	49	26.84	19	26.84	76
47.72	25.74	26.86	53	26.86	38	26.86	55
47.76	27.39	26.88	58	26.88	19	26.88	46
47.8	18.81	26.9	51	26.9	23	26.9	50
47.84	16.5	26.92	33	26.92	33	26.92	56
47.88	23.1	26.94	55	26.94	33	26.94	57
47.92	14.52	26.96	39	26.96	24	26.96	55
47.96	12.54	26.98	37	26.98	27	26.98	67
48	8.58	27	45	27	22	27	66
48.04	13.2	27.02	49	27.02	30	27.02	64
48.08	6.27	27.04	48	27.04	30	27.04	72
48.12	7.26	27.06	42	27.06	37	27.06	69
48.16	8.25	27.08	68	27.08	30	27.08	62
48.2	12.54	27.1	59	27.1	27	27.1	55
48.24	12.54	27.12	66	27.12	23	27.12	54
48.28	15.84	27.14	70	27.14	23	27.14	55
48.32	15.84	27.16	66	27.16	27	27.16	68
48.36	18.15	27.18	73	27.18	26	27.18	59
48.4	26.07	27.2	82	27.2	29	27.2	57
48.44	37.95	27.22	57	27.22	26	27.22	55
48.48	40.92	27.24	53	27.24	29	27.24	49
48.52	39.27	27.26	69	27.26	17	27.26	56
48.56	31.02	27.28	55	27.28	30	27.28	45
48.6	28.38	27.3	46	27.3	28	27.3	49
48.64	30.36	27.32	50	27.32	23	27.32	42
48.68	24.42	27.34	43	27.34	37	27.34	44
48.72	24.09	27.36	36	27.36	30	27.36	40
48.76	24.09	27.38	28	27.38	29	27.38	44
48.8	23.43	27.4	32	27.4	39	27.4	37
48.84	30.69	27.42	33	27.42	37	27.42	38
48.88	26.07	27.44	24	27.44	33	27.44	32
48.92	36.63	27.46	22	27.46	42	27.46	30
48.96	31.35	27.48	30	27.48	39	27.48	38
49	26.73	27.5	35	27.5	34	27.5	41
49.04	20.46	27.52	32	27.52	34	27.52	43
49.08	23.76	27.54	26	27.54	31	27.54	39
49.12	11.22	27.56	29	27.56	29	27.56	53
49.16	11.88	27.58	39	27.58	33	27.58	40
49.2	15.18	27.6	35	27.6	29	27.6	39
49.24	8.58	27.62	41	27.62	20	27.62	34
49.28	8.25	27.64	37	27.64	28	27.64	36
49.32	12.21	27.66	43	27.66	30	27.66	37
49.36	17.49	27.68	34	27.68	14	27.68	34
49.4	13.53	27.7	35	27.7	13	27.7	36
49.44	12.87	27.72	31	27.72	19	27.72	27
49.48	18.81	27.74	31	27.74	22	27.74	34
49.52	23.76	27.76	34	27.76	18	27.76	35
49.56	19.8	27.78	34	27.78	22	27.78	30
49.6	16.83	27.8	39	27.8	26	27.8	24
49.64	15.18	27.82	28	27.82	27	27.82	41
49.68	19.14	27.84	22	27.84	23	27.84	30
49.72	21.45	27.86	27	27.86	26	27.86	29
49.76	18.15	27.88	27	27.88	22	27.88	36
49.8	18.81	27.9	26	27.9	21	27.9	21
49.84	21.45	27.92	28	27.92	28	27.92	21
49.88	27.06	27.94	15	27.94	20	27.94	23
49.92	20.79	27.96	26	27.96	21	27.96	15
49.96	23.76	27.98	22	27.98	24	27.98	21
50	21.78	28	25	28	29	28	26
50.04	23.1	28.02	14	28.02	23	28.02	25
50.08	20.13	28.04	16	28.04	19	28.04	21
50.12	10.56	28.06	18	28.06	14	28.06	26
50.16	15.18	28.08	18	28.08	25	28.08	21
50.2	13.2	28.1	23	28.1	21	28.1	21
50.24	10.89	28.12	14	28.12	17	28.12	25
50.28	14.19	28.14	11	28.14	18	28.14	28
50.32	14.19	28.16	22	28.16	16	28.16	25
50.36	14.85	28.18	16	28.18	23	28.18	30
50.4	10.56	28.2	19	28.2	15	28.2	20
50.44	11.22	28.22	20	28.22	18	28.22	28
50.48	14.52	28.24	28	28.24	16	28.24	39
50.52	13.53	28.26	24	28.26	24	28.26	31
50.56	15.51	28.28	21	28.28	13	28.28	17
50.6	10.23	28.3	22	28.3	12	28.3	27
50.64	16.83	28.32	28	28.32	7	28.32	41
50.68	13.53	28.34	27	28.34	14	28.34	30
50.72	13.86	28.36	16	28.36	20	28.36	25
50.76	11.88	28.38	14	28.38	12	28.38	32
50.8	14.85	28.4	20	28.4	22	28.4	35
50.84	10.56	28.42	18	28.42	18	28.42	24
50.88	17.49	28.44	22	28.44	15	28.44	36
50.92	23.1	28.46	20	28.46	21	28.46	34
50.96	18.15	28.48	19	28.48	19	28.48	36
51	19.14	28.5	20	28.5	23	28.5	29
51.04	17.82	28.52	27	28.52	16	28.52	21
51.08	16.83	28.54	24	28.54	28	28.54	26
51.12	15.84	28.56	39	28.56	20	28.56	28
51.16	15.18	28.58	24	28.58	19	28.58	22
51.2	16.5	28.6	28	28.6	16	28.6	24
51.24	23.1	28.62	31	28.62	20	28.62	20
51.28	21.12	28.64	30	28.64	20	28.64	33
51.32	19.47	28.66	36	28.66	14	28.66	33
51.36	15.51	28.68	19	28.68	27	28.68	28
51.4	16.5	28.7	26	28.7	19	28.7	21
51.44	11.22	28.72	21	28.72	14	28.72	26
51.48	18.15	28.74	20	28.74	17	28.74	34
51.52	19.14	28.76	21	28.76	21	28.76	26
51.56	22.44	28.78	25	28.78	17	28.78	24
51.6	28.38	28.8	21	28.8	17	28.8	19
51.64	26.07	28.82	25	28.82	17	28.82	28
51.68	33.33	28.84	18	28.84	21	28.84	24
51.72	27.06	28.86	30	28.86	18	28.86	26
51.76	33.66	28.88	26	28.88	25	28.88	19
51.8	32.34	28.9	25	28.9	17	28.9	19
51.84	32.67	28.92	11	28.92	23	28.92	25
51.88	31.02	28.94	22	28.94	14	28.94	31
51.92	26.07	28.96	28	28.96	19	28.96	19
51.96	27.06	28.98	24	28.98	21	28.98	31
52	22.77	29	14	29	17	29	25
52.04	21.12	29.02	16	29.02	26	29.02	33
52.08	23.76	29.04	15	29.04	16	29.04	29
52.12	22.11	29.06	23	29.06	19	29.06	32
52.16	24.09	29.08	19	29.08	21	29.08	33
52.2	26.4	29.1	19	29.1	12	29.1	31
52.24	24.09	29.12	16	29.12	13	29.12	35
52.28	37.95	29.14	21	29.14	20	29.14	36
52.32	33.33	29.16	14	29.16	13	29.16	33
52.36	39.93	29.18	26	29.18	15	29.18	46
52.4	31.35	29.2	28	29.2	19	29.2	49
52.44	26.4	29.22	21	29.22	14	29.22	43
52.48	22.77	29.24	24	29.24	18	29.24	50
52.52	17.49	29.26	25	29.26	14	29.26	47
52.56	14.52	29.28	32	29.28	24	29.28	53
52.6	11.22	29.3	35	29.3	17	29.3	49
52.64	14.85	29.32	36	29.32	11	29.32	56
52.68	13.2	29.34	42	29.34	27	29.34	43
52.72	14.19	29.36	53	29.36	21	29.36	53
52.76	13.2	29.38	54	29.38	24	29.38	58
52.8	10.89	29.4	39	29.4	10	29.4	52
52.84	9.9	29.42	47	29.42	17	29.42	45
52.88	16.17	29.44	47	29.44	20	29.44	63
52.92	10.89	29.46	57	29.46	12	29.46	52
52.96	12.87	29.48	41	29.48	13	29.48	49
53	17.49	29.5	44	29.5	14	29.5	40
53.04	14.85	29.52	53	29.52	14	29.52	44
53.08	14.85	29.54	58	29.54	21	29.54	47
53.12	11.88	29.56	42	29.56	17	29.56	54
53.16	13.53	29.58	44	29.58	25	29.58	45
53.2	16.17	29.6	45	29.6	25	29.6	55
53.24	18.48	29.62	60	29.62	31	29.62	35
53.28	18.15	29.64	59	29.64	33	29.64	29
53.32	21.45	29.66	47	29.66	34	29.66	49
53.36	16.17	29.68	26	29.68	35	29.68	39
53.4	22.11	29.7	36	29.7	31	29.7	33
53.44	21.12	29.72	34	29.72	34	29.72	34
53.48	18.15	29.74	38	29.74	34	29.74	36
53.52	17.49	29.76	27	29.76	38	29.76	48
53.56	17.49	29.78	33	29.78	27	29.78	54
53.6	14.52	29.8	21	29.8	28	29.8	38
53.64	18.15	29.82	30	29.82	31	29.82	53
53.68	18.15	29.84	26	29.84	23	29.84	67
53.72	22.11	29.86	21	29.86	29	29.86	66
53.76	23.43	29.88	32	29.88	35	29.88	77
53.8	22.11	29.9	26	29.9	27	29.9	95
53.84	12.87	29.92	36	29.92	25	29.92	100
53.88	18.48	29.94	33	29.94	26	29.94	97
53.92	18.81	29.96	37	29.96	31	29.96	84
53.96	11.88	29.98	51	29.98	24	29.98	99
54	16.5	30	57	30	27	30	75
54.04	20.46	30.02	68	30.02	15	30.02	91
54.08	16.17	30.04	64	30.04	21	30.04	77
54.12	15.84	30.06	71	30.06	21	30.06	99
54.16	13.86	30.08	82	30.08	14	30.08	92
54.2	20.13	30.1	77	30.1	24	30.1	89
54.24	16.5	30.12	92	30.12	21	30.12	86
54.28	13.2	30.14	106	30.14	18	30.14	91
54.32	11.88	30.16	83	30.16	17	30.16	83
54.36	13.2	30.18	94	30.18	27	30.18	68
54.4	14.19	30.2	78	30.2	23	30.2	68
54.44	11.22	30.22	85	30.22	37	30.22	73
54.48	12.87	30.24	66	30.24	23	30.24	69
54.52	14.19	30.26	79	30.26	40	30.26	61
54.56	10.56	30.28	62	30.28	42	30.28	70
54.6	14.19	30.3	41	30.3	34	30.3	65
54.64	14.85	30.32	52	30.32	45	30.32	59
54.68	17.16	30.34	50	30.34	60	30.34	67
54.72	27.72	30.36	54	30.36	66	30.36	72
54.76	26.07	30.38	72	30.38	71	30.38	69
54.8	39.27	30.4	54	30.4	54	30.4	66
54.84	51.48	30.42	59	30.42	55	30.42	58
54.88	61.05	30.44	63	30.44	61	30.44	52
54.92	50.82	30.46	63	30.46	47	30.46	57
54.96	66.33	30.48	48	30.48	35	30.48	39
55	81.84	30.5	55	30.5	42	30.5	50
55.04	59.07	30.52	44	30.52	43	30.52	50
55.08	59.4	30.54	49	30.54	34	30.54	35
55.12	50.82	30.56	48	30.56	33	30.56	31
55.16	73.59	30.58	34	30.58	30	30.58	30
55.2	57.42	30.6	37	30.6	43	30.6	34
55.24	53.13	30.62	32	30.62	33	30.62	28
55.28	37.62	30.64	38	30.64	39	30.64	31
55.32	41.91	30.66	22	30.66	48	30.66	34
55.36	37.29	30.68	28	30.68	41	30.68	29
55.4	26.07	30.7	26	30.7	39	30.7	18
55.44	24.75	30.72	32	30.72	44	30.72	30
55.48	25.74	30.74	37	30.74	39	30.74	21
55.52	23.43	30.76	26	30.76	31	30.76	26
55.56	26.73	30.78	29	30.78	30	30.78	24
55.6	29.7	30.8	22	30.8	26	30.8	28
55.64	35.97	30.82	26	30.82	30	30.82	29
55.68	32.67	30.84	30	30.84	24	30.84	33
55.72	38.61	30.86	25	30.86	30	30.86	28
55.76	39.93	30.88	29	30.88	19	30.88	20
55.8	39.93	30.9	25	30.9	19	30.9	19
55.84	39.93	30.92	21	30.92	19	30.92	20
55.88	34.65	30.94	23	30.94	27	30.94	20
55.92	29.7	30.96	20	30.96	19	30.96	21
55.96	26.07	30.98	15	30.98	19	30.98	23
56	28.05	31	15	31	19	31	27
56.04	27.06	31.02	19	31.02	18	31.02	20
56.08	25.08	31.04	16	31.04	13	31.04	29
56.12	21.78	31.06	13	31.06	11	31.06	24
56.16	19.8	31.08	14	31.08	24	31.08	17
56.2	18.15	31.1	24	31.1	16	31.1	21
56.24	19.8	31.12	22	31.12	13	31.12	32
56.28	17.82	31.14	20	31.14	16	31.14	33
56.32	17.16	31.16	20	31.16	14	31.16	28
56.36	17.16	31.18	22	31.18	19	31.18	33
56.4	21.45	31.2	16	31.2	19	31.2	40
56.44	21.45	31.22	12	31.22	8	31.22	25
56.48	31.35	31.24	19	31.24	22	31.24	34
56.52	29.37	31.26	20	31.26	9	31.26	28
56.56	31.02	31.28	17	31.28	19	31.28	22
56.6	25.41	31.3	30	31.3	19	31.3	30
56.64	22.11	31.32	22	31.32	15	31.32	36
56.68	20.13	31.34	25	31.34	14	31.34	30
56.72	20.46	31.36	19	31.36	10	31.36	41
56.76	18.48	31.38	36	31.38	18	31.38	36
56.8	16.83	31.4	30	31.4	10	31.4	20
56.84	12.54	31.42	33	31.42	17	31.42	45
56.88	15.51	31.44	43	31.44	9	31.44	33
56.92	16.83	31.46	31	31.46	16	31.46	37
56.96	23.1	31.48	38	31.48	16	31.48	28
57	20.13	31.5	39	31.5	13	31.5	24
57.04	21.78	31.52	30	31.52	16	31.52	43
57.08	23.43	31.54	26	31.54	18	31.54	32
57.12	18.48	31.56	21	31.56	17	31.56	20
57.16	27.06	31.58	31	31.58	6	31.58	26
57.2	25.41	31.6	24	31.6	12	31.6	24
57.24	27.39	31.62	23	31.62	15	31.62	19
57.28	33	31.64	22	31.64	22	31.64	19
57.32	29.04	31.66	29	31.66	17	31.66	26
57.36	25.08	31.68	33	31.68	24	31.68	24
57.4	21.12	31.7	26	31.7	20	31.7	25
57.44	22.11	31.72	17	31.72	26	31.72	21
57.48	16.17	31.74	21	31.74	27	31.74	16
57.52	17.16	31.76	25	31.76	19	31.76	22
57.56	16.17	31.78	24	31.78	19	31.78	30
57.6	12.54	31.8	24	31.8	22	31.8	23
57.64	16.5	31.82	27	31.82	15	31.82	28
57.68	19.14	31.84	29	31.84	17	31.84	20
57.72	17.49	31.86	21	31.86	11	31.86	29
57.76	17.16	31.88	19	31.88	16	31.88	19
57.8	16.83	31.9	25	31.9	21	31.9	20
57.84	13.86	31.92	19	31.92	16	31.92	20
57.88	12.87	31.94	19	31.94	21	31.94	22
57.92	12.21	31.96	21	31.96	11	31.96	14
57.96	15.51	31.98	19	31.98	24	31.98	30
58	16.83	32	17	32	12	32	17
58.04	16.5	32.02	32	32.02	12	32.02	15
58.08	15.51	32.04	19	32.04	14	32.04	11
58.12	13.86	32.06	19	32.06	15	32.06	15
58.16	15.51	32.08	17	32.08	14	32.08	26
58.2	15.51	32.1	19	32.1	18	32.1	29
58.24	11.88	32.12	26	32.12	10	32.12	22
58.28	13.86	32.14	19	32.14	16	32.14	18
58.32	14.19	32.16	15	32.16	16	32.16	26
58.36	20.46	32.18	15	32.18	17	32.18	25
58.4	19.47	32.2	21	32.2	7	32.2	22
58.44	14.85	32.22	24	32.22	18	32.22	33
58.48	16.17	32.24	20	32.24	18	32.24	21
58.52	11.55	32.26	20	32.26	19	32.26	32
58.56	17.49	32.28	24	32.28	15	32.28	29
58.6	13.53	32.3	28	32.3	13	32.3	28
58.64	14.85	32.32	21	32.32	12	32.32	27
58.68	14.85	32.34	23	32.34	11	32.34	19
58.72	14.52	32.36	32	32.36	11	32.36	33
58.76	20.79	32.38	23	32.38	12	32.38	31
58.8	19.47	32.4	33	32.4	9	32.4	30
58.84	20.46	32.42	22	32.42	9	32.42	23
58.88	21.12	32.44	23	32.44	16	32.44	20
58.92	26.4	32.46	20	32.46	15	32.46	19
58.96	24.75	32.48	26	32.48	15	32.48	23
59	25.74	32.5	18	32.5	15	32.5	19
59.04	24.09	32.52	21	32.52	18	32.52	18
59.08	26.07	32.54	22	32.54	12	32.54	14
59.12	33.99	32.56	25	32.56	12	32.56	31
59.16	30.69	32.58	19	32.58	16	32.58	26
59.2	25.74	32.6	22	32.6	12	32.6	23
59.24	25.08	32.62	31	32.62	15	32.62	33
59.28	25.08	32.64	17	32.64	18	32.64	29
59.32	15.18	32.66	20	32.66	17	32.66	33
59.36	21.45	32.68	17	32.68	16	32.68	27
59.4	14.52	32.7	24	32.7	25	32.7	30
59.44	14.85	32.72	18	32.72	19	32.72	34
59.48	15.84	32.74	23	32.74	17	32.74	24
59.52	11.55	32.76	18	32.76	16	32.76	40
59.56	11.22	32.78	20	32.78	11	32.78	37
59.6	10.23	32.8	20	32.8	13	32.8	32
59.64	13.2	32.82	23	32.82	14	32.82	45
59.68	14.52	32.84	30	32.84	8	32.84	39
59.72	14.19	32.86	22	32.86	12	32.86	32
59.76	16.83	32.88	27	32.88	15	32.88	38
59.8	14.52	32.9	42	32.9	15	32.9	47
59.84	17.82	32.92	27	32.92	9	32.92	37
59.88	16.5	32.94	23	32.94	19	32.94	37
59.92	14.52	32.96	23	32.96	16	32.96	36
59.96	14.52	32.98	35	32.98	15	32.98	31
60	11.88	33	39	33	15	33	30
60.04	15.18	33.02	39	33.02	24	33.02	24
60.08	14.85	33.04	38	33.04	17	33.04	36
60.12	17.49	33.06	23	33.06	15	33.06	33
60.16	15.84	33.08	27	33.08	18	33.08	22
60.2	18.15	33.1	31	33.1	17	33.1	22
60.24	19.47	33.12	30	33.12	16	33.12	30
60.28	20.46	33.14	31	33.14	14	33.14	14
60.32	13.86	33.16	31	33.16	26	33.16	26
60.36	17.49	33.18	31	33.18	25	33.18	31
60.4	13.53	33.2	22	33.2	21	33.2	25
60.44	17.49	33.22	20	33.22	28	33.22	15
60.48	21.45	33.24	20	33.24	25	33.24	17
60.52	17.82	33.26	25	33.26	23	33.26	21
60.56	19.14	33.28	16	33.28	26	33.28	13
60.6	14.52	33.3	14	33.3	23	33.3	31
60.64	19.14	33.32	24	33.32	22	33.32	14
60.68	15.18	33.34	19	33.34	25	33.34	27
60.72	16.83	33.36	30	33.36	15	33.36	29
60.76	14.19	33.38	20	33.38	28	33.38	19
60.8	16.17	33.4	17	33.4	23	33.4	18
60.84	20.46	33.42	23	33.42	13	33.42	24
60.88	18.81	33.44	14	33.44	18	33.44	30
60.92	22.77	33.46	21	33.46	14	33.46	22
60.96	24.09	33.48	22	33.48	19	33.48	28
61	24.75	33.5	25	33.5	14	33.5	30
61.04	20.79	33.52	14	33.52	18	33.52	25
61.08	19.8	33.54	23	33.54	8	33.54	26
61.12	20.79	33.56	21	33.56	18	33.56	29
61.16	22.44	33.58	20	33.58	13	33.58	27
61.2	20.13	33.6	19	33.6	11	33.6	33
61.24	16.83	33.62	21	33.62	16	33.62	31
61.28	13.86	33.64	24	33.64	9	33.64	26
61.32	12.87	33.66	19	33.66	14	33.66	29
61.36	17.49	33.68	29	33.68	12	33.68	28
61.4	14.52	33.7	17	33.7	8	33.7	25
61.44	19.8	33.72	18	33.72	16	33.72	26
61.48	19.47	33.74	27	33.74	15	33.74	26
61.52	20.79	33.76	14	33.76	15	33.76	18
61.56	20.13	33.78	18	33.78	22	33.78	32
61.6	24.75	33.8	22	33.8	10	33.8	19
61.64	24.75	33.82	16	33.82	18	33.82	26
61.68	16.17	33.84	17	33.84	19	33.84	24
61.72	17.16	33.86	20	33.86	22	33.86	21
61.76	18.81	33.88	23	33.88	21	33.88	38
61.8	24.42	33.9	18	33.9	13	33.9	34
61.84	16.83	33.92	23	33.92	14	33.92	26
61.88	22.11	33.94	18	33.94	14	33.94	25
61.92	22.44	33.96	22	33.96	13	33.96	36
61.96	23.43	33.98	20	33.98	14	33.98	23
62	30.03	34	31	34	10	34	23
62.04	28.05	34.02	27	34.02	16	34.02	26
62.08	33.99	34.04	21	34.04	12	34.04	25
62.12	45.54	34.06	15	34.06	19	34.06	21
62.16	33.33	34.08	24	34.08	16	34.08	20
62.2	27.06	34.1	25	34.1	11	34.1	18
62.24	30.03	34.12	24	34.12	13	34.12	26
62.28	27.72	34.14	24	34.14	16	34.14	20
62.32	27.06	34.16	24	34.16	18	34.16	22
62.36	34.32	34.18	22	34.18	29	34.18	14
62.4	33.99	34.2	17	34.2	16	34.2	36
62.44	31.35	34.22	20	34.22	11	34.22	25
62.48	39.6	34.24	19	34.24	14	34.24	30
62.52	45.54	34.26	20	34.26	14	34.26	35
62.56	40.26	34.28	18	34.28	25	34.28	28
62.6	42.57	34.3	20	34.3	28	34.3	31
62.64	36.3	34.32	17	34.32	18	34.32	30
62.68	46.2	34.34	21	34.34	9	34.34	26
62.72	42.9	34.36	24	34.36	15	34.36	37
62.76	34.98	34.38	20	34.38	11	34.38	23
62.8	36.63	34.4	16	34.4	11	34.4	31
62.84	27.06	34.42	25	34.42	15	34.42	31
62.88	25.41	34.44	29	34.44	11	34.44	39
62.92	24.42	34.46	25	34.46	13	34.46	31
62.96	27.39	34.48	23	34.48	11	34.48	29
63	22.11	34.5	28	34.5	20	34.5	36
63.04	21.12	34.52	32	34.52	11	34.52	22
63.08	21.45	34.54	32	34.54	19	34.54	25
63.12	28.38	34.56	38	34.56	10	34.56	35
63.16	27.39	34.58	31	34.58	21	34.58	37
63.2	27.39	34.6	32	34.6	7	34.6	32
63.24	30.36	34.62	19	34.62	17	34.62	33
63.28	25.74	34.64	23	34.64	9	34.64	25
63.32	30.03	34.66	31	34.66	12	34.66	32
63.36	33.99	34.68	28	34.68	20	34.68	32
63.4	35.31	34.7	31	34.7	9	34.7	33
63.44	52.47	34.72	33	34.72	9	34.72	29
63.48	60.06	34.74	22	34.74	16	34.74	31
63.52	82.17	34.76	29	34.76	18	34.76	39
63.56	88.77	34.78	31	34.78	24	34.78	22
63.6	86.46	34.8	38	34.8	10	34.8	23
63.64	60.06	34.82	29	34.82	23	34.82	33
63.68	52.14	34.84	22	34.84	25	34.84	26
63.72	60.06	34.86	36	34.86	17	34.86	34
63.76	68.64	34.88	23	34.88	19	34.88	33
63.8	50.82	34.9	28	34.9	24	34.9	41
63.84	35.64	34.92	29	34.92	22	34.92	29
63.88	26.07	34.94	27	34.94	22	34.94	19
63.92	31.68	34.96	26	34.96	18	34.96	18
63.96	32.01	34.98	27	34.98	17	34.98	27
64	30.36	35	30	35	19	35	35
64.04	25.08	35.02	23	35.02	16	35.02	26
64.08	27.72	35.04	17	35.04	18	35.04	21
64.12	27.72	35.06	24	35.06	26	35.06	30
64.16	29.7	35.08	30	35.08	15	35.08	32
64.2	36.96	35.1	26	35.1	19	35.1	32
64.24	50.49	35.12	21	35.12	15	35.12	29
64.28	52.8	35.14	34	35.14	14	35.14	26
64.32	46.2	35.16	26	35.16	20	35.16	37
64.36	38.61	35.18	23	35.18	19	35.18	44
64.4	51.48	35.2	34	35.2	21	35.2	35
64.44	58.41	35.22	29	35.22	17	35.22	28
64.48	56.76	35.24	32	35.24	12	35.24	24
64.52	45.54	35.26	28	35.26	17	35.26	19
64.56	37.29	35.28	28	35.28	19	35.28	24
64.6	42.9	35.3	25	35.3	18	35.3	19
64.64	38.28	35.32	23	35.32	18	35.32	31
64.68	45.54	35.34	28	35.34	21	35.34	32
64.72	50.82	35.36	31	35.36	18	35.36	29
64.76	42.57	35.38	25	35.38	19	35.38	23
64.8	36.96	35.4	26	35.4	22	35.4	22
64.84	28.05	35.42	20	35.42	14	35.42	24
64.88	32.67	35.44	26	35.44	17	35.44	21
64.92	36.96	35.46	28	35.46	17	35.46	21
64.96	36.3	35.48	20	35.48	25	35.48	24
65	30.69	35.5	27	35.5	18	35.5	26
65.04	37.62	35.52	22	35.52	19	35.52	19
65.08	26.73	35.54	19	35.54	18	35.54	22
65.12	28.05	35.56	25	35.56	16	35.56	11
65.16	26.07	35.58	24	35.58	20	35.58	17
65.2	28.38	35.6	15	35.6	23	35.6	25
65.24	30.69	35.62	13	35.62	18	35.62	14
65.28	34.98	35.64	19	35.64	13	35.64	24
65.32	45.54	35.66	15	35.66	17	35.66	36
65.36	57.42	35.68	13	35.68	8	35.68	34
65.4	52.14	35.7	20	35.7	19	35.7	27
65.44	49.17	35.72	24	35.72	14	35.72	36
65.48	43.23	35.74	21	35.74	18	35.74	28
65.52	39.6	35.76	29	35.76	11	35.76	28
65.56	31.68	35.78	21	35.78	15	35.78	35
65.6	35.31	35.8	19	35.8	17	35.8	24
65.64	29.04	35.82	34	35.82	13	35.82	31
65.68	27.72	35.84	21	35.84	11	35.84	30
65.72	24.42	35.86	28	35.86	12	35.86	24
65.76	32.01	35.88	33	35.88	12	35.88	26
65.8	43.89	35.9	29	35.9	16	35.9	36
65.84	46.53	35.92	18	35.92	15	35.92	27
65.88	35.31	35.94	30	35.94	20	35.94	25
65.92	35.31	35.96	33	35.96	16	35.96	35
65.96	35.64	35.98	22	35.98	26	35.98	28
66	34.65	36	20	36	10	36	34
66.04	44.88	36.02	18	36.02	11	36.02	18
66.08	38.61	36.04	23	36.04	13	36.04	36
66.12	35.64	36.06	26	36.06	25	36.06	32
66.16	40.92	36.08	22	36.08	12	36.08	23
66.2	40.59	36.1	16	36.1	18	36.1	38
66.24	41.58	36.12	15	36.12	20	36.12	36
66.28	32.34	36.14	30	36.14	24	36.14	32
66.32	28.05	36.16	24	36.16	18	36.16	46
66.36	31.35	36.18	27	36.18	20	36.18	38
66.4	26.07	36.2	23	36.2	16	36.2	40
66.44	32.34	36.22	30	36.22	18	36.22	39
66.48	26.4	36.24	32	36.24	19	36.24	36
66.52	26.4	36.26	29	36.26	18	36.26	46
66.56	27.39	36.28	32	36.28	16	36.28	42
66.6	22.44	36.3	36	36.3	20	36.3	46
66.64	20.13	36.32	41	36.32	16	36.32	49
66.68	21.45	36.34	32	36.34	11	36.34	41
66.72	16.83	36.36	40	36.36	21	36.36	39
66.76	20.13	36.38	43	36.38	20	36.38	32
66.8	21.45	36.4	28	36.4	15	36.4	37
66.84	24.42	36.42	38	36.42	15	36.42	35
66.88	30.36	36.44	43	36.44	23	36.44	35
66.92	36.96	36.46	27	36.46	21	36.46	20
66.96	34.98	36.48	34	36.48	19	36.48	32
67	43.89	36.5	33	36.5	21	36.5	35
67.04	49.5	36.52	31	36.52	24	36.52	36
67.08	47.52	36.54	32	36.54	18	36.54	31
67.12	52.8	36.56	40	36.56	21	36.56	19
67.16	45.87	36.58	24	36.58	29	36.58	26
67.2	54.78	36.6	31	36.6	28	36.6	29
67.24	44.22	36.62	21	36.62	26	36.62	24
67.28	41.25	36.64	30	36.64	21	36.64	39
67.32	36.63	36.66	24	36.66	23	36.66	27
67.36	30.69	36.68	23	36.68	25	36.68	31
67.4	36.3	36.7	25	36.7	26	36.7	25
67.44	36.3	36.72	25	36.72	22	36.72	27
67.48	42.9	36.74	26	36.74	17	36.74	35
67.52	30.03	36.76	31	36.76	17	36.76	15
67.56	33.66	36.78	33	36.78	23	36.78	14
67.6	33.66	36.8	25	36.8	25	36.8	24
67.64	39.6	36.82	28	36.82	22	36.82	24
67.68	32.34	36.84	19	36.84	14	36.84	24
67.72	31.02	36.86	22	36.86	21	36.86	20
67.76	26.4	36.88	18	36.88	17	36.88	31
67.8	32.34	36.9	17	36.9	22	36.9	19
67.84	29.37	36.92	15	36.92	18	36.92	27
67.88	27.06	36.94	19	36.94	23	36.94	23
67.92	24.42	36.96	26	36.96	11	36.96	14
67.96	23.43	36.98	17	36.98	13	36.98	20
68	33	37	24	37	22	37	27
68.04	22.44	37.02	17	37.02	11	37.02	22
68.08	18.81	37.04	18	37.04	16	37.04	19
68.12	21.78	37.06	17	37.06	14	37.06	26
68.16	25.08	37.08	10	37.08	17	37.08	27
68.2	25.41	37.1	18	37.1	22	37.1	18
68.24	14.52	37.12	18	37.12	12	37.12	16
68.28	16.83	37.14	16	37.14	21	37.14	24
68.32	22.77	37.16	26	37.16	12	37.16	28
68.36	19.47	37.18	18	37.18	17	37.18	24
68.4	16.83	37.2	17	37.2	20	37.2	30
68.44	18.48	37.22	23	37.22	20	37.22	27
68.48	20.13	37.24	23	37.24	27	37.24	32
68.52	16.17	37.26	16	37.26	18	37.26	37
68.56	17.49	37.28	20	37.28	14	37.28	27
68.6	16.5	37.3	30	37.3	10	37.3	27
68.64	21.45	37.32	23	37.32	12	37.32	37
68.68	18.48	37.34	26	37.34	16	37.34	36
68.72	25.08	37.36	23	37.36	15	37.36	32
68.76	15.84	37.38	23	37.38	11	37.38	34
68.8	22.77	37.4	18	37.4	12	37.4	25
68.84	27.72	37.42	26	37.42	13	37.42	38
68.88	33	37.44	31	37.44	21	37.44	35
68.92	23.76	37.46	26	37.46	20	37.46	39
68.96	21.45	37.48	37	37.48	15	37.48	43
69	18.81	37.5	28	37.5	9	37.5	39
69.04	21.78	37.52	30	37.52	17	37.52	36
69.08	27.06	37.54	29	37.54	18	37.54	40
69.12	21.12	37.56	27	37.56	18	37.56	35
69.16	19.8	37.58	35	37.58	20	37.58	38
69.2	24.42	37.6	25	37.6	27	37.6	33
69.24	20.46	37.62	30	37.62	26	37.62	32
69.28	15.84	37.64	31	37.64	13	37.64	40
69.32	18.15	37.66	36	37.66	12	37.66	35
69.36	23.43	37.68	30	37.68	12	37.68	29
69.4	19.8	37.7	37	37.7	24	37.7	24
69.44	18.48	37.72	15	37.72	13	37.72	32
69.48	20.79	37.74	28	37.74	25	37.74	24
69.52	18.81	37.76	29	37.76	15	37.76	33
69.56	18.48	37.78	31	37.78	23	37.78	27
69.6	17.82	37.8	31	37.8	18	37.8	27
69.64	15.51	37.82	27	37.82	15	37.82	36
69.68	11.88	37.84	34	37.84	20	37.84	24
69.72	18.81	37.86	30	37.86	20	37.86	24
69.76	18.48	37.88	26	37.88	17	37.88	18
69.8	22.77	37.9	25	37.9	20	37.9	16
69.84	21.12	37.92	32	37.92	20	37.92	26
69.88	20.46	37.94	22	37.94	26	37.94	23
69.92	15.51	37.96	23	37.96	22	37.96	21
69.96	18.81	37.98	29	37.98	10	37.98	28
70	17.82	38	23	38	26	38	22
70.04	21.12	38.02	19	38.02	17	38.02	24
70.08	23.43	38.04	22	38.04	28	38.04	22
70.12	15.18	38.06	31	38.06	15	38.06	27
70.16	24.75	38.08	25	38.08	20	38.08	17
70.2	23.76	38.1	16	38.1	17	38.1	17
70.24	24.75	38.12	25	38.12	20	38.12	21
70.28	24.09	38.14	22	38.14	25	38.14	19
70.32	20.46	38.16	13	38.16	19	38.16	24
70.36	29.04	38.18	17	38.18	15	38.18	14
70.4	25.41	38.2	31	38.2	16	38.2	27
70.44	23.1	38.22	13	38.22	24	38.22	26
70.48	28.71	38.24	19	38.24	21	38.24	24
70.52	21.12	38.26	14	38.26	20	38.26	20
70.56	22.44	38.28	16	38.28	21	38.28	21
70.6	22.11	38.3	19	38.3	15	38.3	22
70.64	24.09	38.32	18	38.32	21	38.32	25
70.68	20.46	38.34	13	38.34	18	38.34	22
70.72	22.44	38.36	15	38.36	11	38.36	17
70.76	18.15	38.38	24	38.38	22	38.38	25
70.8	20.46	38.4	20	38.4	9	38.4	15
70.84	20.79	38.42	23	38.42	15	38.42	22
70.88	19.8	38.44	11	38.44	13	38.44	25
70.92	21.45	38.46	12	38.46	19	38.46	21
70.96	20.46	38.48	18	38.48	12	38.48	20
71	23.1	38.5	14	38.5	15	38.5	22
71.04	21.12	38.52	15	38.52	4	38.52	32
71.08	19.14	38.54	16	38.54	15	38.54	31
71.12	19.14	38.56	16	38.56	14	38.56	29
71.16	22.11	38.58	12	38.58	8	38.58	15
71.2	18.48	38.6	13	38.6	12	38.6	20
71.24	23.76	38.62	17	38.62	14	38.62	15
71.28	26.07	38.64	17	38.64	16	38.64	17
71.32	26.4	38.66	21	38.66	12	38.66	22
71.36	24.42	38.68	19	38.68	12	38.68	24
71.4	24.42	38.7	10	38.7	15	38.7	24
71.44	25.74	38.72	17	38.72	11	38.72	19
71.48	18.15	38.74	12	38.74	16	38.74	22
71.52	14.85	38.76	11	38.76	12	38.76	16
71.56	18.48	38.78	15	38.78	18	38.78	17
71.6	19.47	38.8	14	38.8	15	38.8	19
71.64	17.16	38.82	17	38.82	16	38.82	17
71.68	15.84	38.84	22	38.84	16	38.84	17
71.72	17.49	38.86	23	38.86	15	38.86	17
71.76	14.52	38.88	21	38.88	12	38.88	13
71.8	10.89	38.9	15	38.9	15	38.9	25
71.84	14.19	38.92	19	38.92	13	38.92	29
71.88	20.13	38.94	28	38.94	7	38.94	18
71.92	16.5	38.96	20	38.96	15	38.96	19
71.96	16.83	38.98	17	38.98	14	38.98	15
72	17.16	39	16	39	16	39	16
72.04	16.17	39.02	13	39.02	15	39.02	11
72.08	16.83	39.04	20	39.04	19	39.04	18
72.12	17.49	39.06	19	39.06	12	39.06	25
72.16	19.14	39.08	19	39.08	17	39.08	21
72.2	14.52	39.1	20	39.1	15	39.1	15
72.24	17.16	39.12	14	39.12	8	39.12	18
72.28	15.84	39.14	13	39.14	7	39.14	23
72.32	14.85	39.16	16	39.16	8	39.16	14
72.36	17.16	39.18	17	39.18	13	39.18	18
72.4	15.18	39.2	13	39.2	12	39.2	12
72.44	16.83	39.22	20	39.22	18	39.22	12
72.48	17.16	39.24	17	39.24	10	39.24	18
72.52	13.2	39.26	19	39.26	10	39.26	30
72.56	14.85	39.28	17	39.28	12	39.28	15
72.6	9.9	39.3	10	39.3	13	39.3	22
72.64	14.19	39.32	18	39.32	12	39.32	14
72.68	12.87	39.34	13	39.34	9	39.34	24
72.72	10.89	39.36	18	39.36	7	39.36	20
72.76	13.2	39.38	13	39.38	9	39.38	28
72.8	13.86	39.4	12	39.4	16	39.4	19
72.84	16.5	39.42	20	39.42	15	39.42	20
72.88	11.22	39.44	14	39.44	12	39.44	23
72.92	10.56	39.46	20	39.46	12	39.46	19
72.96	13.86	39.48	14	39.48	12	39.48	17
73	11.55	39.5	22	39.5	10	39.5	12
73.04	11.22	39.52	17	39.52	11	39.52	31
73.08	14.52	39.54	13	39.54	12	39.54	12
73.12	13.2	39.56	18	39.56	14	39.56	13
73.16	16.5	39.58	13	39.58	12	39.58	24
73.2	18.48	39.6	21	39.6	17	39.6	16
73.24	13.86	39.62	9	39.62	7	39.62	20
73.28	14.85	39.64	15	39.64	15	39.64	20
73.32	18.15	39.66	16	39.66	4	39.66	16
73.36	11.88	39.68	13	39.68	12	39.68	18
73.4	16.83	39.7	13	39.7	17	39.7	23
73.44	16.83	39.72	19	39.72	7	39.72	15
73.48	23.43	39.74	17	39.74	14	39.74	16
73.52	24.42	39.76	17	39.76	10	39.76	18
73.56	25.74	39.78	11	39.78	11	39.78	13
73.6	22.44	39.8	10	39.8	7	39.8	13
73.64	21.12	39.82	15	39.82	15	39.82	21
73.68	25.41	39.84	16	39.84	9	39.84	15
73.72	25.08	39.86	13	39.86	8	39.86	16
73.76	23.1	39.88	20	39.88	10	39.88	11
73.8	28.05	39.9	12	39.9	10	39.9	18
73.84	18.15	39.92	19	39.92	9	39.92	18
73.88	15.18	39.94	20	39.94	10	39.94	18
73.92	19.14	39.96	15	39.96	7	39.96	10
73.96	16.17	39.98	14	39.98	12	39.98	12
74	19.47	40	15	40	11	40	11
74.04	15.51	40.02	12	40.02	9	40.02	14
74.08	14.19	40.04	8	40.04	11	40.04	13
74.12	16.5	40.06	12	40.06	11	40.06	12
74.16	14.52	40.08	13	40.08	10	40.08	11
74.2	14.85	40.1	19	40.1	14	40.1	19
74.24	16.17	40.12	8	40.12	8	40.12	14
74.28	13.86	40.14	19	40.14	12	40.14	12
74.32	13.86	40.16	18	40.16	16	40.16	10
74.36	19.14	40.18	10	40.18	10	40.18	12
74.4	12.21	40.2	14	40.2	20	40.2	9
74.44	21.78	40.22	8	40.22	15	40.22	22
74.48	17.16	40.24	13	40.24	18	40.24	16
74.52	20.46	40.26	12	40.26	10	40.26	14
74.56	16.83	40.28	15	40.28	13	40.28	9
74.6	21.12	40.3	18	40.3	13	40.3	15
74.64	23.1	40.32	10	40.32	6	40.32	17
74.68	25.74	40.34	12	40.34	13	40.34	20
74.72	20.79	40.36	14	40.36	13	40.36	19
74.76	22.44	40.38	11	40.38	10	40.38	18
74.8	20.79	40.4	18	40.4	10	40.4	15
74.84	18.81	40.42	11	40.42	11	40.42	13
74.88	21.45	40.44	8	40.44	12	40.44	19
74.92	26.4	40.46	17	40.46	14	40.46	16
74.96	19.8	40.48	11	40.48	10	40.48	22
75	17.82	40.5	23	40.5	11	40.5	20
75.04	21.12	40.52	17	40.52	12	40.52	10
75.08	14.52	40.54	18	40.54	7	40.54	8
75.12	19.14	40.56	22	40.56	7	40.56	22
75.16	21.12	40.58	16	40.58	8	40.58	18
75.2	28.05	40.6	14	40.6	17	40.6	28
75.24	22.11	40.62	13	40.62	13	40.62	21
75.28	23.43	40.64	10	40.64	13	40.64	24
75.32	26.4	40.66	25	40.66	14	40.66	27
75.36	23.76	40.68	21	40.68	12	40.68	15
75.4	31.68	40.7	17	40.7	8	40.7	20
75.44	33.33	40.72	22	40.72	16	40.72	20
75.48	37.95	40.74	15	40.74	11	40.74	22
75.52	37.29	40.76	15	40.76	18	40.76	22
75.56	39.27	40.78	16	40.78	11	40.78	9
75.6	29.7	40.8	15	40.8	7	40.8	14
75.64	27.06	40.82	19	40.82	9	40.82	18
75.68	28.71	40.84	16	40.84	9	40.84	21
75.72	22.11	40.86	14	40.86	7	40.86	20
75.76	25.74	40.88	17	40.88	20	40.88	18
75.8	22.77	40.9	14	40.9	10	40.9	28
75.84	23.43	40.92	18	40.92	10	40.92	22
75.88	16.5	40.94	19	40.94	15	40.94	12
75.92	18.81	40.96	23	40.96	17	40.96	22
75.96	16.5	40.98	22	40.98	19	40.98	15
76	20.13	41	16	41	7	41	22
76.04	17.16	41.02	12	41.02	12	41.02	16
76.08	20.79	41.04	18	41.04	11	41.04	22
76.12	17.49	41.06	13	41.06	13	41.06	21
76.16	22.11	41.08	20	41.08	11	41.08	18
76.2	19.14	41.1	15	41.1	12	41.1	24
76.24	16.83	41.12	20	41.12	14	41.12	20
76.28	24.09	41.14	20	41.14	12	41.14	21
76.32	16.83	41.16	23	41.16	16	41.16	22
76.36	17.49	41.18	12	41.18	16	41.18	31
76.4	22.44	41.2	33	41.2	8	41.2	24
76.44	25.08	41.22	21	41.22	14	41.22	21
76.48	27.39	41.24	23	41.24	5	41.24	22
76.52	26.4	41.26	22	41.26	9	41.26	14
76.56	28.05	41.28	13	41.28	19	41.28	16
76.6	23.43	41.3	19	41.3	14	41.3	20
76.64	26.4	41.32	23	41.32	12	41.32	20
76.68	20.79	41.34	23	41.34	16	41.34	35
76.72	22.44	41.36	22	41.36	15	41.36	25
76.76	27.72	41.38	23	41.38	18	41.38	24
76.8	27.06	41.4	20	41.4	20	41.4	22
76.84	23.43	41.42	16	41.42	11	41.42	22
76.88	20.79	41.44	26	41.44	13	41.44	38
76.92	21.78	41.46	18	41.46	14	41.46	19
76.96	14.52	41.48	23	41.48	18	41.48	23
77	26.4	41.5	7	41.5	15	41.5	23
77.04	23.76	41.52	14	41.52	20	41.52	12
77.08	30.03	41.54	14	41.54	12	41.54	16
77.12	25.08	41.56	22	41.56	10	41.56	23
77.16	23.76	41.58	29	41.58	15	41.58	16
77.2	28.71	41.6	27	41.6	10	41.6	27
77.24	30.03	41.62	21	41.62	16	41.62	31
77.28	35.64	41.64	14	41.64	11	41.64	23
77.32	28.38	41.66	16	41.66	10	41.66	31
77.36	23.43	41.68	18	41.68	13	41.68	18
77.4	23.43	41.7	20	41.7	11	41.7	16
77.44	26.73	41.72	23	41.72	16	41.72	21
77.48	25.74	41.74	29	41.74	12	41.74	19
77.52	34.98	41.76	21	41.76	13	41.76	18
77.56	31.68	41.78	14	41.78	13	41.78	16
77.6	32.67	41.8	16	41.8	14	41.8	22
77.64	23.76	41.82	18	41.82	9	41.82	22
77.68	15.51	41.84	18	41.84	16	41.84	19
77.72	24.75	41.86	19	41.86	16	41.86	24
77.76	19.47	41.88	17	41.88	20	41.88	20
77.8	24.75	41.9	20	41.9	14	41.9	21
77.84	25.08	41.92	21	41.92	7	41.92	11
77.88	20.13	41.94	17	41.94	21	41.94	15
77.92	18.81	41.96	18	41.96	10	41.96	15
77.96	16.83	41.98	13	41.98	19	41.98	22
78	18.48	42	17	42	11	42	17
78.04	12.87	42.02	13	42.02	15	42.02	14
78.08	18.48	42.04	10	42.04	19	42.04	16
78.12	21.45	42.06	16	42.06	14	42.06	20
78.16	20.46	42.08	17	42.08	22	42.08	20
78.2	22.11	42.1	22	42.1	21	42.1	17
78.24	29.7	42.12	8	42.12	11	42.12	16
78.28	20.79	42.14	21	42.14	6	42.14	19
78.32	29.37	42.16	13	42.16	14	42.16	11
78.36	36.96	42.18	19	42.18	13	42.18	18
78.4	31.68	42.2	13	42.2	10	42.2	14
78.44	40.92	42.22	15	42.22	9	42.22	17
78.48	36.63	42.24	17	42.24	6	42.24	27
78.52	37.95	42.26	18	42.26	14	42.26	12
78.56	31.68	42.28	13	42.28	8	42.28	23
78.6	24.42	42.3	9	42.3	8	42.3	14
78.64	24.75	42.32	9	42.32	11	42.32	17
78.68	32.01	42.34	16	42.34	15	42.34	6
78.72	45.54	42.36	14	42.36	8	42.36	16
78.76	48.84	42.38	14	42.38	4	42.38	9
78.8	45.54	42.4	14	42.4	11	42.4	18
78.84	55.77	42.42	17	42.42	15	42.42	14
78.88	42.24	42.44	11	42.44	12	42.44	16
78.92	40.26	42.46	14	42.46	14	42.46	15
78.96	36.96	42.48	13	42.48	16	42.48	23
79	39.93	42.5	14	42.5	6	42.5	17
79.04	40.26	42.52	12	42.52	9	42.52	28
79.08	49.17	42.54	14	42.54	14	42.54	21
79.12	43.23	42.56	9	42.56	9	42.56	13
79.16	45.54	42.58	15	42.58	8	42.58	18
79.2	33.33	42.6	15	42.6	10	42.6	17
79.24	31.02	42.62	12	42.62	15	42.62	23
79.28	32.01	42.64	21	42.64	8	42.64	15
79.32	27.06	42.66	24	42.66	7	42.66	10
79.36	35.31	42.68	8	42.68	8	42.68	22
79.4	39.93	42.7	15	42.7	13	42.7	17
79.44	30.36	42.72	17	42.72	7	42.72	30
79.48	33	42.74	19	42.74	12	42.74	16
79.52	26.4	42.76	18	42.76	6	42.76	19
79.56	30.36	42.78	23	42.78	13	42.78	13
79.6	27.39	42.8	17	42.8	10	42.8	16
79.64	23.76	42.82	18	42.82	8	42.82	18
79.68	25.08	42.84	11	42.84	9	42.84	22
79.72	29.37	42.86	10	42.86	10	42.86	16
79.76	29.04	42.88	9	42.88	6	42.88	20
79.8	26.73	42.9	18	42.9	14	42.9	20
79.84	30.36	42.92	18	42.92	12	42.92	23
79.88	32.67	42.94	18	42.94	10	42.94	13
79.92	29.37	42.96	15	42.96	8	42.96	14
79.96	21.78	42.98	17	42.98	8	42.98	23
80	28.38	43	15	43	16	43	21
--	--	43.02	14	43.02	7	43.02	22
--	--	43.04	21	43.04	14	43.04	11
--	--	43.06	11	43.06	13	43.06	19
--	--	43.08	27	43.08	7	43.08	23
--	--	43.1	21	43.1	13	43.1	15
--	--	43.12	14	43.12	10	43.12	30
--	--	43.14	20	43.14	8	43.14	20
--	--	43.16	14	43.16	8	43.16	21
--	--	43.18	24	43.18	10	43.18	18
--	--	43.2	16	43.2	10	43.2	21
--	--	43.22	26	43.22	8	43.22	17
--	--	43.24	17	43.24	11	43.24	18
--	--	43.26	21	43.26	13	43.26	19
--	--	43.28	11	43.28	11	43.28	16
--	--	43.3	15	43.3	15	43.3	24
--	--	43.32	21	43.32	6	43.32	15
--	--	43.34	12	43.34	14	43.34	18
--	--	43.36	21	43.36	15	43.36	17
--	--	43.38	19	43.38	9	43.38	21
--	--	43.4	16	43.4	15	43.4	11
--	--	43.42	19	43.42	9	43.42	26
--	--	43.44	27	43.44	8	43.44	20
--	--	43.46	11	43.46	19	43.46	24
--	--	43.48	14	43.48	14	43.48	21
--	--	43.5	21	43.5	11	43.5	30
--	--	43.52	15	43.52	11	43.52	17
--	--	43.54	13	43.54	11	43.54	18
--	--	43.56	15	43.56	7	43.56	19
--	--	43.58	27	43.58	8	43.58	24
--	--	43.6	21	43.6	19	43.6	17
--	--	43.62	24	43.62	20	43.62	33
--	--	43.64	15	43.64	21	43.64	23
--	--	43.66	25	43.66	16	43.66	23
--	--	43.68	29	43.68	12	43.68	18
--	--	43.7	22	43.7	12	43.7	34
--	--	43.72	18	43.72	16	43.72	28
--	--	43.74	22	43.74	15	43.74	17
--	--	43.76	28	43.76	10	43.76	27
--	--	43.78	22	43.78	13	43.78	24
--	--	43.8	18	43.8	15	43.8	22
--	--	43.82	16	43.82	14	43.82	13
--	--	43.84	24	43.84	10	43.84	16
--	--	43.86	22	43.86	14	43.86	26
--	--	43.88	17	43.88	11	43.88	23
--	--	43.9	18	43.9	22	43.9	27
--	--	43.92	17	43.92	20	43.92	18
--	--	43.94	13	43.94	12	43.94	18
--	--	43.96	12	43.96	12	43.96	17
[truncated: 1,302 more rows]
